# Supplementary material for: An evaluation on the alignment of drought policy and planning guidelines with the contemporary disaster risk reduction agenda
Source: Copernicus journal article supplement (doi:10.5194/nhess-2024-163), 2024-09-06
Supplement: Supplementary file 1 [file nhess-2024-163-supplement.zip]

## Sheet: EM-DAT Info
Source:	EM-DAT, CRED / UCLouvain, Brussels, Belgium
	https://www.emdat.be
Glossary:	https://doc.emdat.be/docs/data-structure-and-content/emdat-public-table/
Version:	2024-06-07
File creation:	Sat, 15 Jun 2024 21:34:29 UTC
Table type:	public_emdat_custom_request
# of records:	489

## Sheet: EM-DAT Data
DisNo.	Historic	Classification Key	Disaster Group	Disaster Subgroup	Disaster Type	Disaster Subtype	External IDs	Event Name	ISO	Country	Subregion	Region	Location	Origin	Associated Types	OFDA/BHA Response	Appeal	Declaration	AID Contribution ('000 US$)	Magnitude	Magnitude Scale	Latitude	Longitude	River Basin	Start Year	Start Month	Start Day	End Year	End Month	End Day	Total Deaths	No. Injured	No. Affected	No. Homeless	Total Affected	Reconstruction Costs ('000 US$)	Reconstruction Costs, Adjusted ('000 US$)	Insured Damage ('000 US$)	Insured Damage, Adjusted ('000 US$)	Total Damage ('000 US$)	Total Damage, Adjusted ('000 US$)	CPI	Admin Units	Entry Date	Last Update
1992-9543-NZL	Yes	nat-cli-dro-dro	Natural	Climatological	Drought	Drought			NZL	New Zealand	Australia and New Zealand	Oceania				No	No	No			Km2				1994	1		1994	8											100000	205567	48.6459		2007-05-06	2023-09-25
1994-9096-CHN	Yes	nat-cli-dro-dro	Natural	Climatological	Drought	Drought			CHN	China	Eastern Asia	Asia	Xuwen, Leizhou, Yangjiang, Maoming, Suixi, Hanwei, Chaozhou, Meizhou, Jieyang (Guangdong province)			No	No	No		100	Km2				1994	1		1994	12				82000000		82000000					13755200	28276153	48.6459		2006-09-14	2023-09-25
1994-9162-CRI	Yes	nat-cli-dro-dro	Natural	Climatological	Drought	Drought			CRI	Costa Rica	Latin America and the Caribbean	Americas				No	No	No			Km2				1994	7		1994	9											1000	2056	48.6459		2007-05-06	2023-09-25
1994-9162-GTM	Yes	nat-cli-dro-dro	Natural	Climatological	Drought	Drought			GTM	Guatemala	Latin America and the Caribbean	Americas				No	No	No			Km2				1994	7		1994	9											10000	20557	48.6459		2007-05-06	2023-09-25
1994-9162-HND	Yes	nat-cli-dro-dro	Natural	Climatological	Drought	Drought			HND	Honduras	Latin America and the Caribbean	Americas				No	No	No			Km2				1994	7		1994	9											10000	20557	48.6459		2007-05-06	2023-09-25
1994-9162-NIC	Yes	nat-cli-dro-dro	Natural	Climatological	Drought	Drought			NIC	Nicaragua	Latin America and the Caribbean	Americas	Western provinces			No	No	Yes			Km2				1994	7		1994	9				75000		75000					16000	32891	48.6459		2007-05-06	2023-09-25
1994-9162-PRI	Yes	nat-cli-dro-dro	Natural	Climatological	Drought	Drought			PRI	Puerto Rico	Latin America and the Caribbean	Americas				No	No	No			Km2				1994	7		1994	9											2000	4111	48.6459		2007-05-06	2023-09-25
1994-9162-SLV	Yes	nat-cli-dro-dro	Natural	Climatological	Drought	Drought			SLV	El Salvador	Latin America and the Caribbean	Americas				No	No	No			Km2				1994	7		1994	9											1000	2056	48.6459		2007-05-06	2023-09-25
1994-9186-CHN	Yes	nat-cli-dro-dro	Natural	Climatological	Drought	Drought			CHN	China	Eastern Asia	Asia	Anhui, Jiangsu, Sichuan Provinces			No	No	No		140000	Km2				1994	3		1995					6690000		6690000							48.6459		2006-02-13	2023-09-25
1994-9207-BRA	Yes	nat-cli-dro-dro	Natural	Climatological	Drought	Drought			BRA	Brazil	Latin America and the Caribbean	Americas				No	No	No			Km2				1994			1994														48.6459		2006-02-13	2023-09-25
1994-9223-KHM	Yes	nat-cli-dro-dro	Natural	Climatological	Drought	Drought			KHM	Cambodia	South-eastern Asia	Asia	Prey Veng, Kompong Speu, Kompong Chhnang, Takeo provinces		Famine|Flood	No	No	No		3000	Km2				1994	6		1996					5000000		5000000					100000	205567	48.6459		2006-07-12	2023-09-25
1994-9422-KEN	Yes	nat-cli-dro-dro	Natural	Climatological	Drought	Drought			KEN	Kenya	Sub-Saharan Africa	Africa	Northern & northeastern districts			Yes	No	No			Km2				1994	3		1995					1200000		1200000							48.6459		2006-02-13	2023-09-25
1994-9692-BOL	Yes	nat-cli-dro-dro	Natural	Climatological	Drought	Drought			BOL	Bolivia (Plurinational State of)	Latin America and the Caribbean	Americas	Potosi			Yes	No	No			Km2				1994	12		1994					50000		50000							48.6459		2006-02-13	2023-09-25
1995-9026-BFA	Yes	nat-cli-dro-dro	Natural	Climatological	Drought	Drought			BFA	Burkina Faso	Sub-Saharan Africa	Africa	Bam, Kadigo, Outbritenga, Oudalan, Sanmatenga, Seno, Soum, Yatenga provinces		Famine|Food shortage	No	No	No			Km2				1995	12		1996					75590		75590							50.0107		2006-11-17	2023-09-25
1995-9119-MEX	Yes	nat-cli-dro-dro	Natural	Climatological	Drought	Drought			MEX	Mexico	Latin America and the Caribbean	Americas	Coahuila, Durango, Chihuahua, Nuevo Leon			No	No	No			Km2				1995	6		1995	6											100000	199957	50.0107		2006-02-13	2023-09-25
1995-9138-CHN	Yes	nat-cli-dro-dro	Natural	Climatological	Drought	Drought			CHN	China	Eastern Asia	Asia	Nord-East provinces			No	No	No		200000	Km2				1995	1		1995	8				9060000		9060000					12800	25595	50.0107		2006-02-13	2023-09-25
1995-9268-ZMB	Yes	nat-cli-dro-dro	Natural	Climatological	Drought	Drought			ZMB	Zambia	Sub-Saharan Africa	Africa	Southern, Western, Central & Eastern Lusaka Provinces			No	No	No			Km2				1995	8		1995					1273204		1273204							50.0107		2006-02-13	2023-09-25
1995-9269-NAM	Yes	nat-cli-dro-dro	Natural	Climatological	Drought	Drought			NAM	Namibia	Sub-Saharan Africa	Africa				No	No	No			Km2				1995			1996					163200		163200							50.0107		2006-02-13	2023-09-25
1995-9436-ZAF	Yes	nat-cli-dro-dro	Natural	Climatological	Drought	Drought			ZAF	South Africa	Sub-Saharan Africa	Africa	Nebo District (Northern provinces)			No	No	No			Km2				1995	12		1995					300000		300000							50.0107		2006-02-13	2023-09-25
1996-9089-RWA	Yes	nat-cli-dro-dro	Natural	Climatological	Drought	Drought			RWA	Rwanda	Sub-Saharan Africa	Africa	Ginkongoro		Famine|Food shortage	No	Yes	No			Km2				1996	12		1997					82000		82000							51.4766		2006-03-01	2023-09-25
1996-9097-MEX	Yes	nat-cli-dro-dro	Natural	Climatological	Drought	Drought			MEX	Mexico	Latin America and the Caribbean	Americas	North			No	No	No			Km2				1996	5		1996												1200000	2331157	51.4766		2006-03-01	2023-09-25
1996-9119-DJI	Yes	nat-cli-dro-dro	Natural	Climatological	Drought	Drought			DJI	Djibouti	Sub-Saharan Africa	Africa	Gouvetto, Kabah-Kabah, Assamo, Guestir, Ali-Addeh, Hol-Hol (Ali-Sabieh dist.), Yokobi, Asseyla (Dikhil dist.), Makrassoul, Dorba, Assa-Guela, Dabnou, Adgueno, Assal, Neima, Debne-Auri, Bahlo (Tadjourah dist.), Adguenou (Obock dist.), Damerjob, Artawea	Lack rainfall		No	Yes	No	70		Km2				1996	2		1996					100000		100000							51.4766		2006-03-01	2023-09-25
1996-9220-SDN	Yes	nat-cli-dro-dro	Natural	Climatological	Drought	Drought			SDN	Sudan	Northern Africa	Africa	Beja (Red Sea state)			No	No	No			Km2				1996	12		1996					160000		160000							51.4766		2006-03-01	2023-09-25
1996-9326-KEN	Yes	nat-cli-dro-dro	Natural	Climatological	Drought	Drought			KEN	Kenya	Sub-Saharan Africa	Africa	Garissa, Isiolo, Wajir, Mandera, Turkana, Baringo, Kifili, Meru, Makueni, Marsabit/moyale, Tana river, Kitui, Mwingi, Mbere, Tharaka Nithi, Nyambene, Machakos, Taita Taveta, Muranga/Makuyu/Maragwa, Kajiado, Kilifi districts			Yes	Yes	Yes	32256		Km2				1997	1		1998					1600000		1600000							52.6799		2006-03-01	2023-09-25
1996-9326-TZA	Yes	nat-cli-dro-dro	Natural	Climatological	Drought	Drought			TZA	United Republic of Tanzania	Sub-Saharan Africa	Africa	Lake Victoria, North East, Coastal Region		Food shortage|Water shortage	No	No	No			Km2				1996			2000					3000000		3000000							51.4766		2006-03-01	2023-09-25
1996-9328-IND	Yes	nat-cli-dro-dro	Natural	Climatological	Drought	Drought			IND	India	Southern Asia	Asia	Rajasthan			No	No	No		72000	Km2				1996	3		1996	4											542400	1053683	51.4766		2008-04-02	2023-09-25
1997-9023-ECU	Yes	nat-cli-dro-dro	Natural	Climatological	Drought	Drought			ECU	Ecuador	Latin America and the Caribbean	Americas	Celica, Macara, Puyango, Pindal, Sozoranga, Zapotillo counties (Loja province), Arenillas, Las Lajas, Huaquillas counties (El Oro province)	Lack rainfall		No	No	Yes	89		Km2				1997	2		1997					34000		34000							52.6799		2006-10-26	2023-09-25
1997-9043-TCD	Yes	nat-cli-dro-dro	Natural	Climatological	Drought	Drought			TCD	Chad	Sub-Saharan Africa	Africa		Lack of rainfall	Crop failure	No	No	No			Km2				1997			1997					356000		356000							52.6799		2006-03-01	2023-09-25
1997-9074-GUY	Yes	nat-cli-dro-dro	Natural	Climatological	Drought	Drought			GUY	Guyana	Latin America and the Caribbean	Americas	Rupununi Region	El Nino		No	No	Yes	1714		Km2				1997	7		1998					607200		607200					29000	55049	52.6799		2008-01-03	2023-09-25
1997-9091-ETH	Yes	nat-cli-dro-dro	Natural	Climatological	Drought	Drought			ETH	Ethiopia	Sub-Saharan Africa	Africa	Borena, Bale (Oromiya state) South Ome zone, Somali state			No	No	No			Km2				1997	2		1997					986200		986200							52.6799		2006-03-01	2023-09-25
1997-9099-NER	Yes	nat-cli-dro-dro	Natural	Climatological	Drought	Drought			NER	Niger	Sub-Saharan Africa	Africa			Famine|Food shortage	No	Yes	No			Km2				1997	4		1998					8500		8500							52.6799		2006-03-01	2023-09-25
1997-9100-MRT	Yes	nat-cli-dro-dro	Natural	Climatological	Drought	Drought			MRT	Mauritania	Sub-Saharan Africa	Africa	Brakna, Tagant, Assaba, Adrar and Inchiri regions		Crop failure|Famine	Yes	Yes	No			Km2				1997	3		1998					21400		21400							52.6799		2006-03-01	2023-09-25
1997-9105-FRA	Yes	nat-cli-dro-dro	Natural	Climatological	Drought	Drought			FRA	France	Western Europe	Europe				No	No	No			Km2				1997	4		1997												10000	18983	52.6799		2007-05-06	2023-09-25
1997-9105-ITA	Yes	nat-cli-dro-dro	Natural	Climatological	Drought	Drought			ITA	Italy	Southern Europe	Europe				No	No	No			Km2				1997	4		1997												800000	1518605	52.6799		2007-05-06	2023-09-25
1997-9105-PRT	Yes	nat-cli-dro-dro	Natural	Climatological	Drought	Drought			PRT	Portugal	Southern Europe	Europe				No	No	No			Km2				1997	4		1997												10000	18983	52.6799		2007-05-06	2023-09-25
1997-9227-NIC	Yes	nat-cli-dro-dro	Natural	Climatological	Drought	Drought			NIC	Nicaragua	Latin America and the Caribbean	Americas	Mozonte, Ocotal, Santa Maria de Macuelito, San Lucas, Somoto, Yalaguina, Achuapa, Santa Rosa del Penon, Palacaguina, Totogalpa, San Juan de Limay, San Nicolas, Larreynaga, El Sauce, El Jicaral, San Francisco, San Pedro, Villanueva, Santo Tomas, Somototill	El Nino		No	Yes	No	164	134	Km2				1997	9		1997					290000		290000					2000	3797	52.6799		2006-10-26	2023-09-25
1997-9239-AGO	Yes	nat-cli-dro-dro	Natural	Climatological	Drought	Drought			AGO	Angola	Sub-Saharan Africa	Africa				No	No	No			Km2				1997	3		1998					105000		105000							52.6799		2006-03-01	2023-09-25
1997-9244-IDN	Yes	nat-cli-dro-dro	Natural	Climatological	Drought	Drought			IDN	Indonesia	South-eastern Asia	Asia	Irian Jaya Province	El Nino	Famine|Wildfire	No	No	No	12741	4891	Km2				1997	9		1997	11		672		1065000		1065000					88000	167047	52.6799		2007-09-12	2023-09-25
1997-9263-PNG	Yes	nat-cli-dro-dro	Natural	Climatological	Drought	Drought			PNG	Papua New Guinea	Melanesia	Oceania	Milne Bay, Morobe, Madang, East	El Nino	Wildfire	Yes	No	No	17528	452800	Km2				1997	9		1998			60		500000		500000							52.6799		2006-03-01	2023-09-25
1997-9300-SLB	Yes	nat-cli-dro-dro	Natural	Climatological	Drought	Drought			SLB	Solomon Islands	Melanesia	Oceania	Choiseul, Isabel, Western, Central provinces		Water shortage	No	No	No			Km2				1997	11		1997														52.6799		2006-03-01	2023-09-25
1997-9305-HND	Yes	nat-cli-dro-dro	Natural	Climatological	Drought	Drought			HND	Honduras	Latin America and the Caribbean	Americas	Choluteca, Valle, Francisco Morazan, El Paraíso, Comayagua departments			No	No	No	10		Km2				1997	12		1998														52.6799		2006-03-01	2023-09-25
1997-9525-VNM	Yes	nat-cli-dro-dro	Natural	Climatological	Drought	Drought			VNM	Viet Nam	South-eastern Asia	Asia	Quang Tri, Quang Binh, Quang Ngai, Quang Nam, Ha Tinh, Nghe An, Binh Dinh, Gia Lai, Kon Tun provinces		Food shortage	No	Yes	No	85		Km2				1997	12		1998	6				3000000		3000000					407000	772590	52.6799		2006-10-26	2023-09-25
1997-9557-CHN	Yes	nat-cli-dro-dro	Natural	Climatological	Drought	Drought			CHN	China	Eastern Asia	Asia	Shandong			No	No	No		60000	Km2				1997	5		1997	8											169100	320995	52.6799		2006-11-22	2023-09-25
1998-9028-NAM	Yes	nat-cli-dro-dro	Natural	Climatological	Drought	Drought			NAM	Namibia	Sub-Saharan Africa	Africa				No	No	No			Km2				1998	12		1999					25000		25000					1000	1869	53.4977		2006-03-01	2023-09-25
1998-9062-MYS	Yes	nat-cli-dro-dro	Natural	Climatological	Drought	Drought			MYS	Malaysia	South-eastern Asia	Asia	Sabah			No	No	No		30	Km2				1998	3		1998					5000		5000							53.4977		2006-03-01	2023-09-25
1998-9077-COL	Yes	nat-cli-dro-dro	Natural	Climatological	Drought	Drought			COL	Colombia	Latin America and the Caribbean	Americas		El Nino		No	No	No			Km2				1998	1		1998					100000		100000							53.4977		2006-03-01	2023-09-25
1998-9087-FSM	Yes	nat-cli-dro-dro	Natural	Climatological	Drought	Drought			FSM	Micronesia (Federated States of)	Micronesia	Oceania	Pohnpei, Chuuk, Yap states	El Nino		No	Yes	Yes			Km2				1998	3		1998					28800		28800							53.4977		2006-03-01	2023-09-25
1998-9109-PHL	Yes	nat-cli-dro-dro	Natural	Climatological	Drought	Drought			PHL	Philippines	South-eastern Asia	Asia	All country	El Nino		No	No	No			Km2				1998	4		1998			8		2600000		2600000							53.4977		2006-03-01	2023-09-25
1998-9114-BRA	Yes	nat-cli-dro-dro	Natural	Climatological	Drought	Drought			BRA	Brazil	Latin America and the Caribbean	Americas	Nord East, Piaui State	El Nino		No	No	Yes			Km2				1998	4		1999					10000000		10000000					122000	228047	53.4977		2006-03-01	2023-09-25
1998-9153-BFA	Yes	nat-cli-dro-dro	Natural	Climatological	Drought	Drought			BFA	Burkina Faso	Sub-Saharan Africa	Africa			Food shortage	No	No	No			Km2				1998	3		1998					20700		20700							53.4977		2006-03-01	2023-09-25
1998-9197-RUS	Yes	nat-cli-dro-dro	Natural	Climatological	Drought	Drought			RUS	Russian Federation	Eastern Europe	Europe	Tartarstan			No	No	No		7900	Km2				1998	7		1998														53.4977		2006-03-01	2023-09-25
1998-9210-CUB	Yes	nat-cli-dro-dro	Natural	Climatological	Drought	Drought			CUB	Cuba	Latin America and the Caribbean	Americas	Guantanamo, Las Tuna, Holguin, Santiago de Cuba, Granma, Matanzas Provinces		Food shortage	No	No	No		994	Km2				1998	1		1998					820000		820000					180000	336463	53.4977		2006-03-01	2023-09-25
1998-9216-CRI	Yes	nat-cli-dro-dro	Natural	Climatological	Drought	Drought			CRI	Costa Rica	Latin America and the Caribbean	Americas	Guarracaste, Central, South Pacific, Valle Central, Valle del Cuarco regions/provinces	El Nino		No	No	Yes		30	Km2				1998	5		1998												23000	42993	53.4977		2006-03-08	2023-09-25
1998-9216-SLV	Yes	nat-cli-dro-dro	Natural	Climatological	Drought	Drought			SLV	El Salvador	Latin America and the Caribbean	Americas				No	No	No			Km2				1998	5		1998												170000	317771	53.4977		2006-03-08	2023-09-25
1998-9223-SLB	Yes	nat-cli-dro-dro	Natural	Climatological	Drought	Drought			SLB	Solomon Islands	Melanesia	Oceania	Basakana Island	El Nino		No	No	No		1	Km2				1998	8		1998					380		380							53.4977		2006-03-01	2023-09-25
1998-9237-ETH	Yes	nat-cli-dro-dro	Natural	Climatological	Drought	Drought			ETH	Ethiopia	Sub-Saharan Africa	Africa				No	No	No			Km2				1998	7		1998												15600	29160	53.4977		2006-03-01	2023-09-25
1998-9265-UGA	Yes	nat-cli-dro-dro	Natural	Climatological	Drought	Drought			UGA	Uganda	Sub-Saharan Africa	Africa				No	No	No			Km2				1998	1		1999					126000		126000					1600	2991	53.4977		2006-03-01	2023-09-25
1998-9324-FJI	Yes	nat-cli-dro-dro	Natural	Climatological	Drought	Drought			FJI	Fiji	Melanesia	Oceania	Viti Levu, Yasawa, Vanua Levu	Lack of rain, El Nino		No	No	Yes	402	13700	Km2				1998	1		1998					263455		263455							53.4977		2008-01-03	2023-09-25
1998-9330-GIN	Yes	nat-cli-dro-dro	Natural	Climatological	Drought	Drought			GIN	Guinea	Sub-Saharan Africa	Africa			Food shortage	No	No	No			Km2				1998	2		1998	2		12											53.4977		2006-03-01	2023-09-25
1998-9346-CPV	Yes	nat-cli-dro-dro	Natural	Climatological	Drought	Drought			CPV	Cabo Verde	Sub-Saharan Africa	Africa	Praia (Santiago Isl.), Fogo Isl., San Vicente, San Nicolau and Sal.		Famine|Food shortage	No	No	No			Km2				1998	3		1998					10000		10000							53.4977		2006-03-01	2023-09-25
1998-9361-ZWE	Yes	nat-cli-dro-dro	Natural	Climatological	Drought	Drought			ZWE	Zimbabwe	Sub-Saharan Africa	Africa	Southern (Matabeleland)			No	No	Yes			Km2				1998	11		1998					55000		55000							53.4977		2006-03-01	2023-09-25
1998-9620-MOZ	Yes	nat-cli-dro-dro	Natural	Climatological	Drought	Drought			MOZ	Mozambique	Sub-Saharan Africa	Africa	Maputo, Gaza, Inhame (south)			No	No	No			Km2				1998	4		1999														53.4977		2006-03-01	2023-09-25
1998-9670-IRQ	Yes	nat-cli-dro-dro	Natural	Climatological	Drought	Drought			IRQ	Iraq	Western Asia	Asia			Water shortage	No	No	No			Km2				1998			2001														53.4977		2006-03-08	2023-09-25
1999-9037-LAO	Yes	nat-cli-dro-dro	Natural	Climatological	Drought	Drought			LAO	Lao People's Democratic Republic	South-eastern Asia	Asia				No	No	No			Km2				1999	1		1999					20000		20000							54.6682		2006-02-28	2023-09-25
1999-9037-THA	Yes	nat-cli-dro-dro	Natural	Climatological	Drought	Drought			THA	Thailand	South-eastern Asia	Asia		El Nino		No	No	No			Km2				1999	1		1999					6000000		6000000							54.6682		2006-02-13	2023-09-25
1999-9079-CHN	Yes	nat-cli-dro-dro	Natural	Climatological	Drought	Drought			CHN	China	Eastern Asia	Asia	North Region		Water shortage	No	No	No		90000	Km2				1999	3		1999					19000000		19000000							54.6682		2006-02-28	2023-09-25
1999-9084-VNM	Yes	nat-cli-dro-dro	Natural	Climatological	Drought	Drought			VNM	Viet Nam	South-eastern Asia	Asia	Central - North regions			No	No	No		1650	Km2				1999	1		1999					1400000		1400000							54.6682		2006-02-28	2023-09-25
1999-9085-URY	Yes	nat-cli-dro-dro	Natural	Climatological	Drought	Drought			URY	Uruguay	Latin America and the Caribbean	Americas	Artigas, Salto, Paysandu, Rio Negro, Cerro Largo, Tacuarembo, Rivera Departments		Food shortage|Wildfire	No	No	No			Km2				1999	6		2000												250000	457304	54.6682		2006-02-28	2023-09-25
1999-9086-KIR	Yes	nat-cli-dro-dro	Natural	Climatological	Drought	Drought			KIR	Kiribati	Micronesia	Oceania	South Tarawa, Ocean Island			No	Yes	Yes			Km2				1999	3		1999					84000		84000							54.6682		2006-02-28	2023-09-25
1999-9122-IRN	Yes	nat-cli-dro-dro	Natural	Climatological	Drought	Drought			IRN	Iran (Islamic Republic of)	Southern Asia	Asia	Fars, Buchehr, Yazd, Kerman, Sistan-Baluchestan, Kohkiluyeh Boyer-Ahmad, Hormuzgan, Khuzestan provinces	Lack of rain		No	No	No	3372	2500	Km2				1999	4		2001					37000000		37000000					3300000	6036414	54.6682		2008-01-03	2023-09-25
1999-9122-PAK	Yes	nat-cli-dro-dro	Natural	Climatological	Drought	Drought			PAK	Pakistan	Southern Asia	Asia	Thar, Kohistan, Kachoo (Sindh province), Lasbela, Kharan, Chaghi, Loralai,Zhob, Khuzdar, Kalat, Killa Saifullah, Pshin districts (Baluchistan Province)	Lack of rain	Heat wave	No	No	No	24192		Km2				1999	11		2003			143		2200000		2200000					247000	451816	54.6682		2008-01-03	2023-09-25
1999-9149-ESP	Yes	nat-cli-dro-dro	Natural	Climatological	Drought	Drought			ESP	Spain	Southern Europe	Europe	Andalousie, Estrémadure, Castille (centre), Levant (Murcie, Valence, Catalogne, Aragon			No	No	No			Km2				1999	4		1999												3200000	5853492	54.6682		2006-02-28	2023-09-25
1999-9153-ISR	Yes	nat-cli-dro-dro	Natural	Climatological	Drought	Drought			ISR	Israel	Western Asia	Asia				No	No	Yes			Km2				1999	4		1999												75000	137191	54.6682		2006-02-28	2023-09-25
1999-9153-JOR	Yes	nat-cli-dro-dro	Natural	Climatological	Drought	Drought			JOR	Jordan	Western Asia	Asia				No	No	No			Km2				1999	7		1999					180000		180000							54.6682		2006-02-13	2023-09-25
1999-9153-SYR	Yes	nat-cli-dro-dro	Natural	Climatological	Drought	Drought			SYR	Syrian Arab Republic	Western Asia	Asia				No	No	No			Km2				1999	5		2000					329000		329000							54.6682		2006-02-13	2023-09-25
1999-9171-MEX	Yes	nat-cli-dro-dro	Natural	Climatological	Drought	Drought			MEX	Mexico	Latin America and the Caribbean	Americas	Coahuila, Chichuahua, Durango, Sonora, Sinoloa State			No	No	Yes		1200	Km2				1999	5		2000					65000		65000					100000	182922	54.6682		2006-02-28	2023-09-25
1999-9212-MAR	Yes	nat-cli-dro-dro	Natural	Climatological	Drought	Drought			MAR	Morocco	Northern Africa	Africa	Tiznit			Yes	No	Yes			Km2				1999	6		2001					275000		275000					900000	1646295	54.6682		2006-02-28	2023-09-25
1999-9358-USA	Yes	nat-cli-dro-dro	Natural	Climatological	Drought	Drought			USA	United States of America	Northern America	Americas	Kentucky, Maryland, Ohio, Pennsylvania, Virginia , West Virginia			No	No	Yes			Km2				1999	7		1999												1100000	2012138	54.6682		2008-04-08	2023-09-25
1999-9388-BDI	Yes	nat-cli-dro-dro	Natural	Climatological	Drought	Drought			BDI	Burundi	Sub-Saharan Africa	Africa	Bugabira, Busoni, Kirundo, Ntega districts (Kirundo province), Gihanga district (Bubanza province), Rumonge district (Bururi province), Buganda, Rugombo districts (Cibitoke province), Gitega, Ruyigi, Karuzi, Rutana, Makamba, Muyinga, Cankuzo provinces			No	No	No			Km2				1999	10		2001			6		650000		650000							54.6682	[{"adm1_code":40546,"adm1_name":"Cankuzo"},{"adm1_code":40548,"adm1_name":"Gitega"},{"adm1_code":40549,"adm1_name":"Karuzi"},{"adm1_code":40552,"adm1_name":"Makamba"},{"adm1_code":40554,"adm1_name":"Muyinga"},{"adm1_code":40557,"adm1_name":"Rutana"},{"adm1_code":40558,"adm1_name":"Ruyigi"},{"adm2_code":48356,"adm2_name":"Gihanga"},{"adm2_code":40596,"adm2_name":"Rumonge"},{"adm2_code":40605,"adm2…	2008-11-20	2023-09-25
1999-9388-DJI	No	nat-cli-dro-dro	Natural	Climatological	Drought	Drought			DJI	Djibouti	Sub-Saharan Africa	Africa	Ali Sabieh, Dikhil, Djibouti, Obock, Tadjourah provinces			Yes	No	No	1556		Km2				2001	6		2001					100000		100000							58.1115	[{"adm1_code":1093,"adm1_name":"Ali Sabieh"},{"adm1_code":1094,"adm1_name":"Dikhil"},{"adm1_code":1095,"adm1_name":"Djibouti"},{"adm1_code":1096,"adm1_name":"Obock"},{"adm1_code":1097,"adm1_name":"Tadjourah"}]	2006-03-01	2023-09-25
1999-9388-ERI	Yes	nat-cli-dro-dro	Natural	Climatological	Drought	Drought			ERI	Eritrea	Sub-Saharan Africa	Africa	Anseba, Debubawi Keih Bahri, Semenawi Keih Bahri provinces		Food shortage	No	No	No			Km2				1999	10		2003					2300000		2300000							54.6682	[{"adm1_code":1205,"adm1_name":"Anseba"},{"adm1_code":1208,"adm1_name":"Debubawi Keih Bahri"},{"adm1_code":1211,"adm1_name":"Semenawi Keih Bahri"}]	2006-03-08	2023-09-25
1999-9388-ETH	Yes	nat-cli-dro-dro	Natural	Climatological	Drought	Drought			ETH	Ethiopia	Sub-Saharan Africa	Africa	North Wollo, South Wollo, Oromia, Wag Himra districts (Amhara province), Southern district (Tigray province), Beneshangul Gumu, Gambela, Oromia, SNNPR, Somali provinces		Food shortage	Yes	No	No			Km2				1999	9		2000	12				4900000		4900000							54.6682	[{"adm1_code":1230,"adm1_name":"Beneshangul Gumu"},{"adm1_code":1232,"adm1_name":"Gambela"},{"adm1_code":1236,"adm1_name":"SNNPR"},{"adm1_code":47678,"adm1_name":"Oromia"},{"adm1_code":47679,"adm1_name":"Somali"},{"adm2_code":40799,"adm2_name":"North Wollo"},{"adm2_code":40800,"adm2_name":"Oromia"},{"adm2_code":40803,"adm2_name":"Wag Himra"},{"adm2_code":149281,"adm2_name":"South Wollo"},{"adm2_c…	2008-11-21	2023-09-25
1999-9388-KEN	Yes	nat-cli-dro-dro	Natural	Climatological	Drought	Drought			KEN	Kenya	Sub-Saharan Africa	Africa	Nyandarua, Nyeri districts (Central province), Kilifi, Kwale, Lamu, Taita Taveta, Tana River districts (Coast province), Isiolo, Kitui, Machakos, Makueni, Marsabit, Mbeere, Moyale, Mwingi, Tharaka districts (Eastern province), Garissa, Mandera, Wajir districts (North Eastern province), Baringo, Kajiado, Keiyo, Laikipia, Marakwet, Samburu, Trans Mara, Turkana, West Pokot districts (Rift Valley pro…		Food shortage	No	Yes	Yes	6498		Km2				1999	12		2002			85		23000000		23000000							54.6682	[{"adm2_code":51337,"adm2_name":"Nyandarua"},{"adm2_code":51338,"adm2_name":"Nyeri"},{"adm2_code":51340,"adm2_name":"Kilifi"},{"adm2_code":51341,"adm2_name":"Kwale"},{"adm2_code":51342,"adm2_name":"Lamu"},{"adm2_code":51345,"adm2_name":"Taita Taveta"},{"adm2_code":51346,"adm2_name":"Tana River"},{"adm2_code":51348,"adm2_name":"Isiolo"},{"adm2_code":51349,"adm2_name":"Kitui"},{"adm2_code":51350,"a…	2008-01-03	2023-09-25
1999-9388-RWA	Yes	nat-cli-dro-dro	Natural	Climatological	Drought	Drought			RWA	Rwanda	Sub-Saharan Africa	Africa	Umutura village (Rubavu district, West/Iburengerazuba province), Kibungo village (Ngoma district, East/Iburasirazuba province), Gitamara village (Muhanga district, South/Amajyepfo province), Butare village (Huye district, South/Amajyepfo province), Gikongoro village (Nyamagabe district, South/Amajyepfo province), Kigali City/Umujyi wa Kigali province		Food shortage	No	No	No			Km2				1999	11		2000					894545		894545							54.6682	[{"adm1_code":21970,"adm1_name":"Kigali City/Umujyi wa Kigali"},{"adm2_code":21989,"adm2_name":"Ngoma"},{"adm2_code":21981,"adm2_name":"Huye"},{"adm2_code":21987,"adm2_name":"Muhanga"},{"adm2_code":21993,"adm2_name":"Nyamagabe"},{"adm2_code":21998,"adm2_name":"Rubavu"}]	2006-03-08	2023-09-25
1999-9388-SDN	No	nat-cli-dro-dro	Natural	Climatological	Drought	Drought			SDN	Sudan	Northern Africa	Africa	Northern Darfur, Northern Kordofan, Red Sea provinces		Food shortage|Water shortage	No	No	No			Km2				2000	1		2001					2000000		2000000							56.5143	[{"adm1_code":2757,"adm1_name":"Northern Darfur"},{"adm1_code":40772,"adm1_name":"Red Sea"},{"adm1_code":68784,"adm1_name":"Northern Kordofan"}]	2006-03-08	2023-09-25
1999-9388-SOM	No	nat-cli-dro-dro	Natural	Climatological	Drought	Drought			SOM	Somalia	Sub-Saharan Africa	Africa	Ceel Barde, Rab Dhuure, Tayeeglow, Xudur districts (Bakool province), Garbahaarey, Baardheere districts (Gedo province), Bay, Hiraan provinces		Food shortage	No	No	No			Km2				2000	1		2001			21		1200000		1200000							56.5143	[{"adm1_code":2691,"adm1_name":"Bay"},{"adm1_code":2695,"adm1_name":"Hiraan"},{"adm2_code":25657,"adm2_name":"Ceel Barde"},{"adm2_code":25658,"adm2_name":"Rab Dhuure"},{"adm2_code":25659,"adm2_name":"Tayeeglow"},{"adm2_code":25661,"adm2_name":"Xudur"},{"adm2_code":25678,"adm2_name":"Baardheere"},{"adm2_code":25682,"adm2_name":"Garbahaarey"}]	2006-03-08	2023-09-25
1999-9388-UGA	Yes	nat-cli-dro-dro	Natural	Climatological	Drought	Drought			UGA	Uganda	Sub-Saharan Africa	Africa	Abim, Amudat, Kaabong, Kotido, Moroto, Nakapiripirit, Napak provinces		Famine	No	No	No			Km2				1999	8		2001			115		700000		700000							54.6682	[{"adm1_code":743,"adm1_name":"Abim"},{"adm1_code":744,"adm1_name":"Amudat"},{"adm1_code":765,"adm1_name":"Kotido"},{"adm1_code":772,"adm1_name":"Moroto"},{"adm1_code":773,"adm1_name":"Nakapiripirit"},{"adm1_code":775,"adm1_name":"Napak"},{"adm1_code":47074,"adm1_name":"Kaabong"}]	2006-03-08	2023-09-25
1999-9404-PRY	Yes	nat-cli-dro-dro	Natural	Climatological	Drought	Drought			PRY	Paraguay	Latin America and the Caribbean	Americas	Concepcion, San Pedro Department, Alto Paraguay, Boqueon, Presidente Hayes	Lack of rain, extreme temperature	Cold wave	Yes	Yes	Yes	631		Km2				1999	6		2002			12		40000		40000							54.6682		2008-01-03	2023-09-25
1999-9629-MUS	Yes	nat-cli-dro-dro	Natural	Climatological	Drought	Drought			MUS	Mauritius	Sub-Saharan Africa	Africa	Nationwide		Water shortage	No	No	No			Km2				1999	1		1999	4											175000	320113	54.6682		2006-03-08	2023-09-25
2000-9138-JAM	No	nat-cli-dro-dro	Natural	Climatological	Drought	Drought			JAM	Jamaica	Latin America and the Caribbean	Americas	Clarendon, Hanover, Manchester, Portland, Saint Ann, Saint Catherine, Saint Elizabeth, Saint James, Saint Thomas, Trelawny, Westmoreland provinces			No	No	No			Km2				2000	3		2000												6000	10617	56.5143	[{"adm1_code":1636,"adm1_name":"Clarendon"},{"adm1_code":1637,"adm1_name":"Hanover"},{"adm1_code":1638,"adm1_name":"Manchester"},{"adm1_code":1639,"adm1_name":"Portland"},{"adm1_code":1641,"adm1_name":"Saint Ann"},{"adm1_code":1642,"adm1_name":"Saint Catherine"},{"adm1_code":1643,"adm1_name":"Saint Elizabeth"},{"adm1_code":1644,"adm1_name":"Saint James"},{"adm1_code":1646,"adm1_name":"Saint Thoma…	2006-02-28	2023-09-25
2000-9173-CYP	No	nat-cli-dro-dro	Natural	Climatological	Drought	Drought			CYP	Cyprus	Western Asia	Asia	Famgusta, Kyrenia, Larnaca, Limassol, Nicosia, Paphos provinces			No	No	No			Km2				2000	3		2000														56.5143	[{"adm1_code":1024,"adm1_name":"Famgusta"},{"adm1_code":1025,"adm1_name":"Kyrenia"},{"adm1_code":1026,"adm1_name":"Larnaca"},{"adm1_code":1027,"adm1_name":"Limassol"},{"adm1_code":1028,"adm1_name":"Nicosia"},{"adm1_code":1029,"adm1_name":"Paphos"}]	2006-02-28	2023-09-25
2000-9186-AFG	No	nat-cli-dro-dro	Natural	Climatological	Drought	Drought			AFG	Afghanistan	Southern Asia	Asia	Kandahar, Hilmand, Nimroz, Zabul, Uruzgan provinces (south-west), Hirat, Farah, Badghis provinces (west), Paktika, Khost, Ghazni provinces (south), Baghlan, Kunduz, Takhar, Badakhshan provinces (north-east)		Famine|Water shortage	No	Yes	No	715539		Km2				2000	5		2002			37		2580000		2580000					50	88	56.5143	[{"adm1_code":272,"adm1_name":"Badakhshan"},{"adm1_code":273,"adm1_name":"Badghis"},{"adm1_code":274,"adm1_name":"Baghlan"},{"adm1_code":277,"adm1_name":"Farah"},{"adm1_code":279,"adm1_name":"Ghazni"},{"adm1_code":281,"adm1_name":"Hilmand"},{"adm1_code":282,"adm1_name":"Hirat"},{"adm1_code":285,"adm1_name":"Kandahar"},{"adm1_code":287,"adm1_name":"Khost"},{"adm1_code":289,"adm1_name":"Kunduz"},{"…	2008-01-03	2023-09-25
2000-9186-TJK	No	nat-cli-dro-dro	Natural	Climatological	Drought	Drought			TJK	Tajikistan	Central Asia	Asia	Kabodien, Shaartuskiy, Jilikul, Ghozimalik, Kumsangirskiy, Piynjskiy districts (Khatlon province), Gorno Badakhshan Autonomous Oblast (Badakhshoni Kuni province), Leninabad Oblast (Sogd province)	Dry and hot weather		Yes	No	No	15918	2500	Km2				2000	5		2001					3000000		3000000					57000	100859	56.5143	[{"adm1_code":2847,"adm1_name":"Badakhshoni Kuni"},{"adm1_code":2849,"adm1_name":"Sogd"},{"adm2_code":37585,"adm2_name":"Ghozimalik"},{"adm2_code":37587,"adm2_name":"Jilikul"},{"adm2_code":37588,"adm2_name":"Kabodien"},{"adm2_code":37591,"adm2_name":"Kumsangirskiy"},{"adm2_code":37596,"adm2_name":"Piynjskiy"},{"adm2_code":37597,"adm2_name":"Shaartuskiy"}]	2008-01-03	2023-09-25
2000-9222-IND	No	nat-cli-dro-dro	Natural	Climatological	Drought	Drought			IND	India	Southern Asia	Asia	New Delhi city (Delhi province), Gujarat, Rajasthan, Madhya Prasdesh, Andhra Pradesh, Orissa, Maharashtra provinces		Food shortage|Heat wave	No	No	Yes	2247		Km2				2000	4		2001			20		50000000		50000000					588000	1040445	56.5143	[{"adm1_code":1485,"adm1_name":"Andhra Pradesh"},{"adm1_code":1489,"adm1_name":"Delhi"},{"adm1_code":1491,"adm1_name":"Gujarat"},{"adm1_code":1498,"adm1_name":"Maharashtra"},{"adm1_code":1504,"adm1_name":"Orissa"},{"adm1_code":1506,"adm1_name":"Rajasthan"},{"adm1_code":70079,"adm1_name":"Madhya Pradesh"}]	2008-01-03	2023-09-25
2000-9267-CHN	No	nat-cli-dro-dro	Natural	Climatological	Drought	Drought			CHN	China	Eastern Asia	Asia	Jilin Sheng, Jiangxi Sheng, Anhui Sheng provinces			No	No	No		32650	Km2				2000	4		2000					15000000		15000000					796115	1408697	56.5143	[{"adm1_code":898,"adm1_name":"Anhui Sheng"},{"adm1_code":914,"adm1_name":"Jiangxi Sheng"},{"adm1_code":915,"adm1_name":"Jilin Sheng"}]	2006-02-28	2023-09-25
2000-9309-MDG	No	nat-cli-dro-dro	Natural	Climatological	Drought	Drought			MDG	Madagascar	Sub-Saharan Africa	Africa	Ambovombe-Androy, Bekily, Beloha, Tsihombe districts (Androy province), Amboasary-Atsimo ditrict (Anosy province), Ampanihy Ouest district (Atsimo Andrefana province), Ambatatondraza, Amparafaravola, Andilamena, district (Alaotra Mangoro province), Vatomandry, Marolambo, Antanambao Manamposty districts (Atsinanana province), Antsirabe I, Antsirable II, Faratsiho, Antanifotsy, Betafo districts (Va…			No	No	No	420		Km2				2000	6		2000					231290		231290							56.5143	[{"adm2_code":154509,"adm2_name":"Ambatondrazaka"},{"adm2_code":154510,"adm2_name":"Amparafaravola"},{"adm2_code":154511,"adm2_name":"Andilamena"},{"adm2_code":154531,"adm2_name":"Ambovombe-Androy"},{"adm2_code":154532,"adm2_name":"Bekily"},{"adm2_code":154533,"adm2_name":"Beloha"},{"adm2_code":154534,"adm2_name":"Tsihombe"},{"adm2_code":154535,"adm2_name":"Amboasary-Atsimo"},{"adm2_code":154538,…	2008-01-03	2023-09-25
2000-9318-MDA	No	nat-cli-dro-dro	Natural	Climatological	Drought	Drought			MDA	Republic of Moldova	Eastern Europe	Europe	Balti, Cahul, Chisinau, Dubasari, Edinet, Gagauzia, Lapusna, Orhei, Soroca, Tighina, Ungheni provinces			No	No	No			Km2				2000	5		2000	6		2											56.5143	[{"adm1_code":2062,"adm1_name":"Balti"},{"adm1_code":2063,"adm1_name":"Cahul"},{"adm1_code":2064,"adm1_name":"Chisinau"},{"adm1_code":2066,"adm1_name":"Dubasari"},{"adm1_code":2067,"adm1_name":"Edinet"},{"adm1_code":2068,"adm1_name":"Gagauzia"},{"adm1_code":2069,"adm1_name":"Lapusna"},{"adm1_code":2070,"adm1_name":"Orhei"},{"adm1_code":2071,"adm1_name":"Soroca"},{"adm1_code":2072,"adm1_name":"Tig…	2006-09-14	2023-09-25
2000-9327-JOR	No	nat-cli-dro-dro	Natural	Climatological	Drought	Drought			JOR	Jordan	Western Asia	Asia	Ajloon, Amman, Aqaba, Balqa, Irbid, Jarash, Karak, Ma'an, Madaba, Mafraq, Tafiela, Zarqa provinces			No	No	No			Km2				2000	8		2000					150000		150000							56.5143	[{"adm1_code":1701,"adm1_name":"Ajloon"},{"adm1_code":1702,"adm1_name":"Balqa"},{"adm1_code":1703,"adm1_name":"Aqaba"},{"adm1_code":1704,"adm1_name":"Karak"},{"adm1_code":1705,"adm1_name":"Amman"},{"adm1_code":1706,"adm1_name":"Tafiela"},{"adm1_code":1707,"adm1_name":"Irbid"},{"adm1_code":1708,"adm1_name":"Jarash"},{"adm1_code":1709,"adm1_name":"Ma'an"},{"adm1_code":1710,"adm1_name":"Madaba"},{"a…	2006-02-28	2023-09-25
2000-9328-ROU	No	nat-cli-dro-dro	Natural	Climatological	Drought	Drought			ROU	Romania	Eastern Europe	Europe	Dolj, Mehedinti, Teleorman, Olt, Constanta, Braila, Vaslui, Botosani provinces			No	No	No		26000	Km2				2000	6		2000												500000	884732	56.5143	[{"adm1_code":2452,"adm1_name":"Botosani"},{"adm1_code":2453,"adm1_name":"Braila"},{"adm1_code":2460,"adm1_name":"Constanta"},{"adm1_code":2463,"adm1_name":"Dolj"},{"adm1_code":2472,"adm1_name":"Mehedinti"},{"adm1_code":2475,"adm1_name":"Olt"},{"adm1_code":2481,"adm1_name":"Teleorman"},{"adm1_code":2484,"adm1_name":"Vaslui"}]	2006-02-28	2023-09-25
2000-9339-USA	No	nat-cli-dro-dro	Natural	Climatological	Drought	Drought			USA	United States of America	Northern America	Americas	South Carolina, Georgia, Alabama, Florida, Louisiana, Texas provinces			No	No	Yes			Km2				2000	6		2002												1100000	1946410	56.5143	[{"adm1_code":3214,"adm1_name":"Alabama"},{"adm1_code":3223,"adm1_name":"Florida"},{"adm1_code":3224,"adm1_name":"Georgia"},{"adm1_code":3232,"adm1_name":"Louisiana"},{"adm1_code":3254,"adm1_name":"South Carolina"},{"adm1_code":3257,"adm1_name":"Texas"}]	2006-02-28	2023-09-25
2000-9494-UZB	No	nat-cli-dro-dro	Natural	Climatological	Drought	Drought			UZB	Uzbekistan	Central Asia	Asia	Karakalpakstan, Khorezm provinces			Yes	No	No	3	860	Km2				2000	8		2001	8				600000		600000					50000	88473	56.5143	[{"adm1_code":3287,"adm1_name":"Karakalpakstan"},{"adm1_code":3289,"adm1_name":"Khorezm"}]	2008-01-03	2023-09-25
2000-9495-ARM	No	nat-cli-dro-dro	Natural	Climatological	Drought	Drought			ARM	Armenia	Western Asia	Asia	Ararat, Armavir, Gergharkunik, Aragatsotn, Shirak, Kotayk, Tavush, Lori provinces		Heat wave	No	Yes	No	16545	1720	Km2				2000	6		2000					297000		297000					100000	176946	56.5143	[{"adm1_code":453,"adm1_name":"Aragatsotn"},{"adm1_code":454,"adm1_name":"Ararat"},{"adm1_code":455,"adm1_name":"Armavir"},{"adm1_code":456,"adm1_name":"Gergharkunik"},{"adm1_code":457,"adm1_name":"Kotayk"},{"adm1_code":458,"adm1_name":"Lori"},{"adm1_code":460,"adm1_name":"Shirak"},{"adm1_code":462,"adm1_name":"Tavush"}]	2008-01-03	2023-09-25
2000-9495-AZE	No	nat-cli-dro-dro	Natural	Climatological	Drought	Drought			AZE	Azerbaijan	Western Asia	Asia	Absheron, Aran, Daghlig Shirvan, Ganja-Gazakh, Guba-Khachmaz, Kalbajar-Lachin, Lankaran, Nakhchivan, Shaki-Zaqatala, Yukhari Garabakh provinces			No	No	No			Km2				2000	10		2000												100000	176946	56.5143	[{"adm1_code":147297,"adm1_name":"Absheron"},{"adm1_code":147298,"adm1_name":"Aran"},{"adm1_code":147299,"adm1_name":"Daghlig Shirvan"},{"adm1_code":147300,"adm1_name":"Ganja-Gazakh"},{"adm1_code":147301,"adm1_name":"Guba-Khachmaz"},{"adm1_code":147302,"adm1_name":"Kalbajar-Lachin"},{"adm1_code":147303,"adm1_name":"Lankaran"},{"adm1_code":147304,"adm1_name":"Nakhchivan"},{"adm1_code":147305,"adm1…	2006-10-26	2023-09-25
2000-9495-GEO	No	nat-cli-dro-dro	Natural	Climatological	Drought	Drought			GEO	Georgia	Western Asia	Asia	Kakheti, Kvemo Kartli, Samtskhe-Javakheti, Mtskheta-Mtianeti, Shida Kartli, Imereti provinces			Yes	No	Yes	10046		Km2				2000	8		2001					696000		696000					200000	353893	56.5143	[{"adm1_code":1299,"adm1_name":"Imereti"},{"adm1_code":1300,"adm1_name":"Kakheti"},{"adm1_code":1301,"adm1_name":"Kvemo Kartli"},{"adm1_code":1302,"adm1_name":"Mtskheta-Mtianeti"},{"adm1_code":1305,"adm1_name":"Samtskhe-Javakheti"},{"adm1_code":1306,"adm1_name":"Shida Kartli"}]	2008-01-03	2023-09-25
2000-9496-CUB	No	nat-cli-dro-dro	Natural	Climatological	Drought	Drought			CUB	Cuba	Latin America and the Caribbean	Americas	Guantanamo, Santiago De Cuba, Las Tunas, Camaguey provinces			No	No	Yes			Km2				2000	8		2001														56.5143	[{"adm1_code":1009,"adm1_name":"Camaguey"},{"adm1_code":1014,"adm1_name":"Guantanamo"},{"adm1_code":1018,"adm1_name":"Las Tunas"},{"adm1_code":1022,"adm1_name":"Santiago De Cuba"}]	2006-02-28	2023-09-25
2000-9531-CHN	No	nat-cli-dro-dro	Natural	Climatological	Drought	Drought			CHN	China	Eastern Asia	Asia	Nei Mongol Zizhiqu province			No	No	No		26000	Km2				2000	8		2000					5000000		5000000							56.5143	[{"adm1_code":917,"adm1_name":"Nei Mongol Zizhiqu"}]	2006-02-28	2023-09-25
2000-9537-BIH	No	nat-cli-dro-dro	Natural	Climatological	Drought	Drought			BIH	Bosnia and Herzegovina	Southern Europe	Europe	Federacija Bosne I Hercegovine, Republika Srpska provinces	Lack of rain	Heat wave	No	No	No			Km2				2000	8		2000												158000	279575	56.5143	[{"adm1_code":652,"adm1_name":"Federacija Bosne I Hercegovine"},{"adm1_code":653,"adm1_name":"Republika Srpska"}]	2006-02-28	2023-09-25
2000-9604-MNG	No	nat-cli-dro-dro	Natural	Climatological	Drought	Drought			MNG	Mongolia	Eastern Asia	Asia	Guulin town (Delger district, Govi-Altai province), Galshir district (Xentii province), Ider district (Zavxan province), Mo'st, Manxan, Bulgan, U'yench district (Xovd province), Bugat, Jargalan districts (Govi-Altai province), Bogd, Jinst, Baacagaan, Bayan-O'ndor districts (Bayanxongor province), Bayandelger, Tu'vshinshiree, Uulbayan, Asgat districts (Su'xbaatar province), Dornogovi, Dundgovi, O'…		Wildfire	No	No	No			Km2				2000	2		2002					450000		450000							56.5143	[{"adm1_code":2082,"adm1_name":"Dornogovi"},{"adm1_code":2083,"adm1_name":"Dundgovi"},{"adm1_code":2089,"adm1_name":"O'mnogovi"},{"adm2_code":21486,"adm2_name":"Bayan-O'ndor"},{"adm2_code":21487,"adm2_name":"Baacagaan"},{"adm2_code":21492,"adm2_name":"Bogd"},{"adm2_code":21500,"adm2_name":"Jinst"},{"adm2_code":21571,"adm2_name":"Bugat"},{"adm2_code":21574,"adm2_name":"Delger"},{"adm2_code":21578,…	2006-10-26	2023-09-25
2000-9626-CHN	No	nat-cli-dro-dro	Natural	Climatological	Drought	Drought			CHN	China	Eastern Asia	Asia	Guangdong Sheng province			No	No	No		900	Km2				2000	9		2000														56.5143	[{"adm1_code":903,"adm1_name":"Guangdong Sheng"}]	2006-02-28	2023-09-25
2000-9712-USA	No	nat-cli-dro-dro	Natural	Climatological	Drought	Drought			USA	United States of America	Northern America	Americas	Wyoming province		Wildfire	No	No	No			Km2				2000	11		2000														56.5143	[{"adm1_code":3264,"adm1_name":"Wyoming"}]	2006-02-28	2023-09-25
2000-9788-BGR	No	nat-cli-dro-dro	Natural	Climatological	Drought	Drought			BGR	Bulgaria	Eastern Europe	Europe	Blagoevgrad, Burgas, Dobrich, Gabrovo, Haskovo, Jambol, Kardzhali, Kustendil, Lovech, Montana, Pazardzhik, Pernik, Pleven, Plovdiv, Razgrad, Ruse, Shumen, Silistra, Sliven, Smoljan, Sofia, Sofia-city, Stara Zagora, Targovishte, Varna, Veliko Tarnovo, Vidin, Vratca			No	No	No			Km2				2000	3		2001														56.5143	[{"adm1_code":702,"adm1_name":"Blagoevgrad"},{"adm1_code":703,"adm1_name":"Burgas"},{"adm1_code":704,"adm1_name":"Dobrich"},{"adm1_code":705,"adm1_name":"Gabrovo"},{"adm1_code":706,"adm1_name":"Haskovo"},{"adm1_code":707,"adm1_name":"Jambol"},{"adm1_code":708,"adm1_name":"Kardzhali"},{"adm1_code":709,"adm1_name":"Kustendil"},{"adm1_code":710,"adm1_name":"Lovech"},{"adm1_code":711,"adm1_name":"Mon…	2006-02-28	2024-02-06
2000-9860-HND	No	nat-cli-dro-dro	Natural	Climatological	Drought	Drought			HND	Honduras	Latin America and the Caribbean	Americas	Montana de la Flor area (Marale district, Francisco Morazan province)		Famine	No	No	No			Km2				2000	7		2000					1125		1125							56.5143	[{"adm2_code":17308,"adm2_name":"Marale"}]	2006-02-28	2023-09-25
2000-9860-NIC	No	nat-cli-dro-dro	Natural	Climatological	Drought	Drought			NIC	Nicaragua	Latin America and the Caribbean	Americas	Atlantico Norte, Jinotega, Nueva Segovia provinces		Famine	No	No	No			Km2				2000	7		2000														56.5143	[{"adm1_code":2185,"adm1_name":"Atlantico Norte"},{"adm1_code":2193,"adm1_name":"Jinotega"},{"adm1_code":2199,"adm1_name":"Nueva Segovia"}]	2006-02-28	2023-09-25
2000-9881-BOL	No	nat-cli-dro-dro	Natural	Climatological	Drought	Drought			BOL	Bolivia (Plurinational State of)	Latin America and the Caribbean	Americas	Gran Chaco district (Tarija province)			Yes	No	No			Km2				2000	4		2000					20000		20000							56.5143	[{"adm2_code":40539,"adm2_name":"Gran Chaco"}]	2006-10-09	2023-09-25
2001-9044-BFA	No	nat-cli-dro-dro	Natural	Climatological	Drought	Drought			BFA	Burkina Faso	Sub-Saharan Africa	Africa	Plateau Central province			No	No	No			Km2				2001	4		2001														58.1115	[{"adm1_code":40286,"adm1_name":"Plateau Central"}]	2006-10-26	2023-09-25
2001-9044-MLI	No	nat-cli-dro-dro	Natural	Climatological	Drought	Drought			MLI	Mali	Sub-Saharan Africa	Africa	Bamako, Gao, Kayes, Koulikoro, Mopti, Segou, Sikasso provinces; Dire, Gourma-Rharous, Niafunke districts (Tombouctou province) (South/Sahel region)		Famine	No	No	No			Km2				2001	4		2001														58.1115	[{"adm1_code":1926,"adm1_name":"Bamako"},{"adm1_code":1927,"adm1_name":"Gao"},{"adm1_code":1928,"adm1_name":"Kayes"},{"adm1_code":1930,"adm1_name":"Koulikoro"},{"adm1_code":1931,"adm1_name":"Mopti"},{"adm1_code":1932,"adm1_name":"Segou"},{"adm1_code":1933,"adm1_name":"Sikasso"},{"adm2_code":19416,"adm2_name":"Dire"},{"adm2_code":19418,"adm2_name":"Gourma-Rharous"},{"adm2_code":19419,"adm2_name":"…	2006-10-26	2023-09-25
2001-9044-NER	No	nat-cli-dro-dro	Natural	Climatological	Drought	Drought			NER	Niger	Sub-Saharan Africa	Africa	Ibanka, Rouafi I, Rouafi II, Chinagamane villages (Filingue district, Tillaberi province), Sabara I (Dogondoutchi district, Dosso province), Sabara II (Niamey province), Ayawa (Ouallam district, Tillaberi province), Kabefo (Tillaberi district, Tillaberi province), Dinkihmi villages (not found).		Famine	No	No	Yes			Km2				2001	4		2002					3584558		3584558							58.1115	[{"adm1_code":2204,"adm1_name":"Dosso"},{"adm1_code":2206,"adm1_name":"Niamey"},{"adm1_code":2208,"adm1_name":"Tillaberi"}]	2006-10-26	2023-09-25
2001-9044-TCD	No	nat-cli-dro-dro	Natural	Climatological	Drought	Drought			TCD	Chad	Sub-Saharan Africa	Africa	Guera, Biltine, Ouaddaï, Assongha, Batha-Est, Batha-ouest provinces		Food shortage	Yes	No	No			Km2				2001	1		2001					800000		800000							58.1115	[{"adm1_code":870,"adm1_name":"Biltine"},{"adm1_code":873,"adm1_name":"Guera"},{"adm1_code":12904,"adm1_name":"Batha Est"},{"adm1_code":12905,"adm1_name":"Batha Ouest"},{"adm1_code":12926,"adm1_name":"Assongha"},{"adm1_code":12927,"adm1_name":"Ouaddai"}]	2006-10-26	2023-09-25
2001-9048-MOZ	No	nat-cli-dro-dro	Natural	Climatological	Drought	Drought			MOZ	Mozambique	Sub-Saharan Africa	Africa	Inhambane province			No	No	No			Km2				2001	1		2001					100000		100000							58.1115	[{"adm1_code":2114,"adm1_name":"Inhambane"}]	2006-02-27	2023-09-25
2001-9067-CMR	No	nat-cli-dro-dro	Natural	Climatological	Drought	Drought			CMR	Cameroon	Sub-Saharan Africa	Africa	Nord province			No	No	No			Km2				2001	1		2001														58.1115	[{"adm1_code":820,"adm1_name":"Nord"}]	2006-02-27	2023-09-25
2001-9122-MOZ	No	nat-cli-dro-dro	Natural	Climatological	Drought	Drought			MOZ	Mozambique	Sub-Saharan Africa	Africa	Maputo, Gaza, Inhambane, Sofala, Tete, Zambezia provinces			No	No	No		900	Km2				2002	3		2002			9		600000		600000							59.0331	[{"adm1_code":2113,"adm1_name":"Gaza"},{"adm1_code":2114,"adm1_name":"Inhambane"},{"adm1_code":2120,"adm1_name":"Sofala"},{"adm1_code":2121,"adm1_name":"Tete"},{"adm1_code":2122,"adm1_name":"Zambezia"},{"adm1_code":41373,"adm1_name":"Maputo"}]	2007-03-27	2023-09-25
2001-9122-SWZ	No	nat-cli-dro-dro	Natural	Climatological	Drought	Drought			SWZ	Eswatini	Sub-Saharan Africa	Africa	Lomahasha, Lugongolweni, Tikhuba districts (Lubombo province), Madlangampisi, Mhlangatane, Ndzingeni districts (Hhohho province), Dvokodvweni, Hlane, Lubuli, Mhlume, Mpolonjeni, Nkilongo, Siphofaneni, Sithobela districts (Lubombo province), Mafutseni, Mkhiweni districts (Manzini province), Lavumisa, Matsanjeni, Sigwe districts (Shiselweni province), Lobamba, Mayiwane, Ntfonjeni, Timpisini distric…	Poor agro-climaic conditions		No	No	Yes			Km2				2001			2004					970000		970000							58.1115	[{"adm2_code":25944,"adm2_name":"Lobamba"},{"adm2_code":25945,"adm2_name":"Madlangampisi"},{"adm2_code":25947,"adm2_name":"Mayiwane"},{"adm2_code":25949,"adm2_name":"Mhlangatane"},{"adm2_code":25951,"adm2_name":"Ndzingeni"},{"adm2_code":25953,"adm2_name":"Ntfonjeni"},{"adm2_code":25955,"adm2_name":"Timpisini"},{"adm2_code":25956,"adm2_name":"Dvokodvweni"},{"adm2_code":25957,"adm2_name":"Hlane"},{…	2006-03-01	2023-09-25
2001-9122-ZWE	No	nat-cli-dro-dro	Natural	Climatological	Drought	Drought			ZWE	Zimbabwe	Sub-Saharan Africa	Africa	Kwekwe, Gokwe South, Zvishavane, Shurugwi, Gweru, Mberengwa, Gokwe North districts (Midlands province), Mvuma city (Chirumhanzu district, Midlands province), Chipinge district (Manicaland province), Gwanda, Umzingwane, Matobo districts (Matabeleland South province), Chiredzi, Chivi, Masvingo districts (Masvingo province), Hwange, Tsholotsho districts (Matabeleland North province), Kariba district…			No	No	No			Km2				2001	3		2003					6000000		6000000							58.1115	[{"adm2_code":33055,"adm2_name":"Chipinge"},{"adm2_code":68808,"adm2_name":"Guruve"},{"adm2_code":33078,"adm2_name":"Kariba"},{"adm2_code":33082,"adm2_name":"Chiredzi"},{"adm2_code":33083,"adm2_name":"Chivi"},{"adm2_code":33085,"adm2_name":"Masvingo"},{"adm2_code":33097,"adm2_name":"Gwanda"},{"adm2_code":33099,"adm2_name":"Matobo"},{"adm2_code":33100,"adm2_name":"Umzingwane"},{"adm2_code":33101,"…	2006-03-01	2023-09-25
2001-9149-CHN	No	nat-cli-dro-dro	Natural	Climatological	Drought	Drought			CHN	China	Eastern Asia	Asia	Nei Mongol Zizhiqu province			No	No	No			Km2				2001	2		2001					530000		530000							58.1115	[{"adm1_code":917,"adm1_name":"Nei Mongol Zizhiqu"}]	2006-02-27	2023-09-25
2001-9152-AGO	No	nat-cli-dro-dro	Natural	Climatological	Drought	Drought			AGO	Angola	Sub-Saharan Africa	Africa	Cuanza Sul province		Famine	No	No	No			Km2				2001	1		2001			58											58.1115	[{"adm1_code":403,"adm1_name":"Cuanza Sul"}]	2006-02-27	2023-09-25
2001-9218-CHN	No	nat-cli-dro-dro	Natural	Climatological	Drought	Drought			CHN	China	Eastern Asia	Asia	Sichuan Sheng, Yunnan Sheng provinces			No	No	No		233000	Km2				2001	3		2001					15800000		15800000							58.1115	[{"adm1_code":924,"adm1_name":"Sichuan Sheng"},{"adm1_code":929,"adm1_name":"Yunnan Sheng"}]	2006-02-27	2023-09-25
2001-9383-GTM	No	nat-cli-dro-dro	Natural	Climatological	Drought	Drought			GTM	Guatemala	Latin America and the Caribbean	Americas	Chiquimula province		Famine	No	No	No			Km2				2001	9		2001			41		113596		113596					14000	24092	58.1115	[{"adm1_code":64840,"adm1_name":"Chiquimula"}]	2006-02-27	2023-09-25
2001-9383-HND	No	nat-cli-dro-dro	Natural	Climatological	Drought	Drought			HND	Honduras	Latin America and the Caribbean	Americas	Choluteca, Valle, Francisco Morazan, Paraiso, La Paz, Comayagua, Intibuca, Yoro, Lempira provinces		Food shortage	No	No	Yes		960	Km2				2001	7		2004					195000		195000							58.1115	[{"adm1_code":1421,"adm1_name":"Choluteca"},{"adm1_code":1423,"adm1_name":"Comayagua"},{"adm1_code":1426,"adm1_name":"Francisco Morazan"},{"adm1_code":1428,"adm1_name":"Intibuca"},{"adm1_code":1430,"adm1_name":"La Paz"},{"adm1_code":1431,"adm1_name":"Lempira"},{"adm1_code":1435,"adm1_name":"Paraiso"},{"adm1_code":1437,"adm1_name":"Valle"},{"adm1_code":1438,"adm1_name":"Yoro"}]	2006-02-27	2023-09-25
2001-9383-NIC	No	nat-cli-dro-dro	Natural	Climatological	Drought	Drought			NIC	Nicaragua	Latin America and the Caribbean	Americas	Nueva Segovia, Madriz, Esteli, Leon, Chinandega, Carazo, Boaco, Jinotega, Matagalpa provinces		Food shortage	No	Yes	No		1077	Km2				2001	8		2001					188000		188000							58.1115	[{"adm1_code":2187,"adm1_name":"Boaco"},{"adm1_code":2188,"adm1_name":"Carazo"},{"adm1_code":2189,"adm1_name":"Chinandega"},{"adm1_code":2191,"adm1_name":"Esteli"},{"adm1_code":2193,"adm1_name":"Jinotega"},{"adm1_code":2194,"adm1_name":"Leon"},{"adm1_code":2195,"adm1_name":"Madriz"},{"adm1_code":2198,"adm1_name":"Matagalpa"},{"adm1_code":2199,"adm1_name":"Nueva Segovia"}]	2006-02-27	2023-09-25
2001-9383-SLV	No	nat-cli-dro-dro	Natural	Climatological	Drought	Drought			SLV	El Salvador	Latin America and the Caribbean	Americas	Usulutan, San Miguel, Morazan, La Union provinces			No	No	No		450	Km2				2001	5		2001					400000		400000					22400	38547	58.1115	[{"adm1_code":1190,"adm1_name":"La Union"},{"adm1_code":1191,"adm1_name":"Morazan"},{"adm1_code":1192,"adm1_name":"San Miguel"},{"adm1_code":1197,"adm1_name":"Usulutan"}]	2006-02-27	2023-09-25
2001-9394-BRA	No	nat-cli-dro-dro	Natural	Climatological	Drought	Drought			BRA	Brazil	Latin America and the Caribbean	Americas	Pernambuco province			No	No	Yes			Km2				2001	6		2001					1000000		1000000							58.1115	[{"adm1_code":681,"adm1_name":"Pernambuco"}]	2006-02-27	2023-09-25
2001-9398-KOR	No	nat-cli-dro-dro	Natural	Climatological	Drought	Drought			KOR	Republic of Korea	Eastern Asia	Asia	Cheju-do, Chollabuk-do, Chollanam-do, Chungchongbuk-do, Chungchongnam-do, Inchon, Kang-won-do, Kwangju, Kyonggi-do, Kyongsangbuk-do, Kyongsangnam-do, Pusan, Seoul, Taegu, Taejon provinces			No	No	No			Km2				2001	6		2001														58.1115	[{"adm1_code":2431,"adm1_name":"Cheju-do"},{"adm1_code":2432,"adm1_name":"Chollabuk-do"},{"adm1_code":2433,"adm1_name":"Chollanam-do"},{"adm1_code":2434,"adm1_name":"Chungchongbuk-do"},{"adm1_code":2435,"adm1_name":"Chungchongnam-do"},{"adm1_code":2436,"adm1_name":"Inchon"},{"adm1_code":2437,"adm1_name":"Kang-won-do"},{"adm1_code":2438,"adm1_name":"Kwangju"},{"adm1_code":2439,"adm1_name":"Kyonggi…	2006-02-27	2023-09-25
2001-9409-MRT	No	nat-cli-dro-dro	Natural	Climatological	Drought	Drought			MRT	Mauritania	Sub-Saharan Africa	Africa	Assaba, Brakna, Gorgol, Tagant, Nouackchott, Inchiri, Adrar, Hodh el Gharbi, Hodh ech Chargi, Tiris-Zemmour, Dakhlet-Nouadhibou provinces		Food shortage	No	Yes	No	417		Km2				2001	4		2003					1000000		1000000							58.1115	[{"adm1_code":2004,"adm1_name":"Adrar"},{"adm1_code":2005,"adm1_name":"Assaba"},{"adm1_code":2006,"adm1_name":"Brakna"},{"adm1_code":2007,"adm1_name":"Dakhlet-Nouadhibou"},{"adm1_code":2008,"adm1_name":"Gorgol"},{"adm1_code":2010,"adm1_name":"Hodh Ech Chargi"},{"adm1_code":2011,"adm1_name":"Hodh El Gharbi"},{"adm1_code":2012,"adm1_name":"Inchiri"},{"adm1_code":2013,"adm1_name":"Nouakchott"},{"adm…	2008-01-03	2023-09-25
2001-9498-LKA	No	nat-cli-dro-dro	Natural	Climatological	Drought	Drought			LKA	Sri Lanka	Southern Asia	Asia	Hambantota district (Southern province), Kurunegala, Puttalam districts (North Western provinces), Ratnapura district (Sabaragamuwa province), Moneragala, Badulla districts (Uva province), Ampara district (Eastern province)	Lack of rain		Yes	Yes	No	478		Km2				2001	9		2002					1000000		1000000							58.1115	[{"adm2_code":25832,"adm2_name":"Ampara"},{"adm2_code":25837,"adm2_name":"Kurunegala"},{"adm2_code":25838,"adm2_name":"Puttalam"},{"adm2_code":25845,"adm2_name":"Ratnapura"},{"adm2_code":25847,"adm2_name":"Hambantota"},{"adm2_code":25849,"adm2_name":"Badulla"},{"adm2_code":25850,"adm2_name":"Moneragala"}]	2008-01-03	2023-09-25
2001-9525-KHM	No	nat-cli-dro-dro	Natural	Climatological	Drought	Drought			KHM	Cambodia	South-eastern Asia	Asia	Kampong Cham, Kampong Chhnang, Kampong Speu, Kampong Thom, Kampot, Kandal, Kep, Koh Kong, Kratie, Phnom Penh, Preah Sihanouk, Prey Veng, Pursat, Svay Rieng, Takeo provinces			No	No	No			Km2				2001	9		2001					300000		300000							58.1115	[{"adm1_code":793,"adm1_name":"Kampong Cham"},{"adm1_code":794,"adm1_name":"Kampong Chhnang"},{"adm1_code":795,"adm1_name":"Kampong Speu"},{"adm1_code":796,"adm1_name":"Kampong Thom"},{"adm1_code":797,"adm1_name":"Kampot"},{"adm1_code":798,"adm1_name":"Kandal"},{"adm1_code":799,"adm1_name":"Koh Kong"},{"adm1_code":800,"adm1_name":"Kep"},{"adm1_code":801,"adm1_name":"Kratie"},{"adm1_code":802,"adm…	2006-02-27	2023-09-25
2001-9854-NAM	No	nat-cli-dro-dro	Natural	Climatological	Drought	Drought			NAM	Namibia	Sub-Saharan Africa	Africa	Otjovanatje, Otjorute, Okapundja, Otjekwa, Okaurukwa locations (Ruacana district, Omusati province)			No	No	No			Km2				2001	1		2001														58.1115	[{"adm2_code":22320,"adm2_name":"Ruacana"}]	2006-02-27	2023-09-25
2002-9022-NAM	No	nat-cli-dro-dro	Natural	Climatological	Drought	Drought			NAM	Namibia	Sub-Saharan Africa	Africa	Otjozondjupa, Oshikoto, Oshana, Omusati, Ohangwena, Kunene, Kavango, Caprivi provinces (North)			No	No	No			Km2				2002	7		2003					345000		345000							59.0331	[{"adm1_code":2137,"adm1_name":"Caprivi"},{"adm1_code":2141,"adm1_name":"Kavango"},{"adm1_code":2143,"adm1_name":"Kunene"},{"adm1_code":2144,"adm1_name":"Ohangwena"},{"adm1_code":2146,"adm1_name":"Omusati"},{"adm1_code":2147,"adm1_name":"Oshana"},{"adm1_code":2148,"adm1_name":"Oshikoto"},{"adm1_code":2149,"adm1_name":"Otjozondjupa"}]	2006-02-22	2023-09-25
2002-9124-MWI	No	nat-cli-dro-dro	Natural	Climatological	Drought	Drought			MWI	Malawi	Sub-Saharan Africa	Africa	Balaka, Blantyre, Chikwawa, Machinga, Mangochi, Mulanje, Nsanje, Phalombe, Thyolo, Zomba districts (Southern Region Province)		Famine	No	Yes	Yes			Km2				2002	2		2002			500		2829435		2829435							59.0331	[{"adm2_code":19321,"adm2_name":"Blantyre"},{"adm2_code":19322,"adm2_name":"Chikwawa"},{"adm2_code":19325,"adm2_name":"Mangochi"},{"adm2_code":19328,"adm2_name":"Nsanje"},{"adm2_code":19329,"adm2_name":"Thyolo"},{"adm2_code":19330,"adm2_name":"Zomba"},{"adm2_code":42174,"adm2_name":"Balaka"},{"adm2_code":42175,"adm2_name":"Machinga"},{"adm2_code":42176,"adm2_name":"Mulanje"},{"adm2_code":42177,"a…	2006-10-26	2023-09-25
2002-9132-VNM	No	nat-cli-dro-dro	Natural	Climatological	Drought	Drought			VNM	Viet Nam	South-eastern Asia	Asia	An Giang, Kien Giang, Long An provinces			No	No	No			Km2				2002	5		2002					1300000		1300000					200000	338793	59.0331	[{"adm1_code":3326,"adm1_name":"An Giang"},{"adm1_code":3356,"adm1_name":"Kien Giang"},{"adm1_code":3362,"adm1_name":"Long An"}]	2006-02-22	2023-09-25
2002-9158-THA	No	nat-cli-dro-dro	Natural	Climatological	Drought	Drought			THA	Thailand	South-eastern Asia	Asia	Nakhon Sawan, Udon Thani, Khon Kaen, Satun, Phrae, Loei, Kalasin, Sukhothai, Nakhon Ratchasima provinces	El Nino		No	No	No		4500	Km2				2002	2		2002					5000000		5000000					2300	3896	59.0331	[{"adm1_code":2863,"adm1_name":"Kalasin"},{"adm1_code":2866,"adm1_name":"Khon Kaen"},{"adm1_code":2870,"adm1_name":"Loei"},{"adm1_code":2878,"adm1_name":"Nakhon Ratchasima"},{"adm1_code":2879,"adm1_name":"Nakhon Sawan"},{"adm1_code":2897,"adm1_name":"Phrae"},{"adm1_code":2910,"adm1_name":"Satun"},{"adm1_code":2914,"adm1_name":"Sukhothai"},{"adm1_code":2922,"adm1_name":"Udon Thani"}]	2006-02-22	2023-09-25
2002-9164-PHL	No	nat-cli-dro-dro	Natural	Climatological	Drought	Drought			PHL	Philippines	South-eastern Asia	Asia	Pangasinan, La Union, Ilocos Norte, Ilocos Sur districts (Region I (Ilocos region) province)			No	No	No		178	Km2				2002	3		2002	3											453	767	59.0331	[{"adm2_code":24211,"adm2_name":"Ilocos Norte"},{"adm2_code":24212,"adm2_name":"Ilocos Sur"},{"adm2_code":24213,"adm2_name":"La Union"},{"adm2_code":24214,"adm2_name":"Pangasinan"}]	2006-02-22	2023-09-25
2002-9203-CHN	No	nat-cli-dro-dro	Natural	Climatological	Drought	Drought			CHN	China	Eastern Asia	Asia	Guangdong Sheng, Fujian Sheng, Guangxi Zhuangzu Zizhiqu provinces			No	No	No		2200	Km2				2002	4		2002					60000000		60000000							59.0331	[{"adm1_code":901,"adm1_name":"Fujian Sheng"},{"adm1_code":903,"adm1_name":"Guangdong Sheng"},{"adm1_code":904,"adm1_name":"Guangxi Zhuangzu Zizhiqu"}]	2006-02-22	2023-09-25
2002-9292-MEX	No	nat-cli-dro-dro	Natural	Climatological	Drought	Drought			MEX	Mexico	Latin America and the Caribbean	Americas	Baja California, Coahuila, Tamaulipas, Veracruz, Sinaloa, Tlaxcala, Sonora, San Luis Potosi provinces			No	No	No			Km2				2002	4		2002												210000	355732	59.0331	[{"adm1_code":2029,"adm1_name":"Baja California"},{"adm1_code":2034,"adm1_name":"Coahuila"},{"adm1_code":2051,"adm1_name":"San Luis Potosi"},{"adm1_code":2052,"adm1_name":"Sinaloa"},{"adm1_code":2053,"adm1_name":"Sonora"},{"adm1_code":2055,"adm1_name":"Tamaulipas"},{"adm1_code":2056,"adm1_name":"Tlaxcala"},{"adm1_code":2057,"adm1_name":"Veracruz"}]	2006-02-22	2023-09-25
2002-9298-ITA	No	nat-cli-dro-dro	Natural	Climatological	Drought	Drought			ITA	Italy	Southern Europe	Europe	Sicilia, Basilicata, Puglia, Sardegna provinces	Lack of rain		No	No	Yes			Km2				2002	5		2002														59.0331	[{"adm1_code":1617,"adm1_name":"Basilicata"},{"adm1_code":1628,"adm1_name":"Puglia"},{"adm1_code":1629,"adm1_name":"Sardegna"},{"adm1_code":1630,"adm1_name":"Sicilia"}]	2006-02-22	2023-09-25
2002-9332-GNB	No	nat-cli-dro-dro	Natural	Climatological	Drought	Drought			GNB	Guinea-Bissau	Sub-Saharan Africa	Africa	All country: Gabu, Bafata (mainly affected provinces in North-eastern), Biombo, Bolama/bijagos, Cacheu, Oio, Quinara, Sector Autonomo De Bissau, Tombali provinces			No	No	No			Km2				2002	5		2002	5				100000		100000							59.0331	[{"adm1_code":1385,"adm1_name":"Bafata"},{"adm1_code":1386,"adm1_name":"Biombo"},{"adm1_code":1387,"adm1_name":"Bolama/bijagos"},{"adm1_code":1388,"adm1_name":"Cacheu"},{"adm1_code":1389,"adm1_name":"Gabu"},{"adm1_code":1390,"adm1_name":"Oio"},{"adm1_code":1391,"adm1_name":"Quinara"},{"adm1_code":1392,"adm1_name":"Sector Autonomo De Bissau"},{"adm1_code":1393,"adm1_name":"Tombali"}]	2006-02-22	2023-09-25
2002-9333-LSO	No	nat-cli-dro-dro	Natural	Climatological	Drought	Drought			LSO	Lesotho	Sub-Saharan Africa	Africa	Qacha's Nek, Quthing, Mohale's Hoek provinces		Famine|Food shortage	No	No	No			Km2				2002	4		2003					500000		500000							59.0331	[{"adm1_code":1808,"adm1_name":"Mohale's Hoek"},{"adm1_code":1810,"adm1_name":"Qacha's Nek"},{"adm1_code":1811,"adm1_name":"Quthing"}]	2006-02-22	2023-09-25
2002-9349-IND	No	nat-cli-dro-dro	Natural	Climatological	Drought	Drought			IND	India	Southern Asia	Asia	Uttar Pradesh, Madhya Pradesh, Rajasthan, Punjab, Haryana, Delhi, Karnataka, Kerala, Nagaland, Orissa, Chhattisgarh, Himachal Pradesh, Gujarat, Maharashtra, Andhra Pradesh, Tamil Nadu provinces	Insufficient and erratic monsoon rain		No	No	Yes	146	560000	Km2				2002	7		2002					300000000		300000000					910722	1542730	59.0331	[{"adm1_code":1485,"adm1_name":"Andhra Pradesh"},{"adm1_code":1489,"adm1_name":"Delhi"},{"adm1_code":1491,"adm1_name":"Gujarat"},{"adm1_code":1492,"adm1_name":"Haryana"},{"adm1_code":1493,"adm1_name":"Himachal Pradesh"},{"adm1_code":1494,"adm1_name":"Karnataka"},{"adm1_code":1495,"adm1_name":"Kerala"},{"adm1_code":1498,"adm1_name":"Maharashtra"},{"adm1_code":1503,"adm1_name":"Nagaland"},{"adm1_co…	2008-01-03	2023-09-25
2002-9398-CPV	No	nat-cli-dro-dro	Natural	Climatological	Drought	Drought			CPV	Cabo Verde	Sub-Saharan Africa	Africa	Santiago, Santo Antao Provinces		Food shortage	No	No	No			Km2				2002	6		2002					30000		30000							59.0331	[{"adm1_code":848,"adm1_name":"Santiago"},{"adm1_code":849,"adm1_name":"Santo Antao"}]	2006-02-22	2023-09-25
2002-9485-KHM	No	nat-cli-dro-dro	Natural	Climatological	Drought	Drought			KHM	Cambodia	South-eastern Asia	Asia	Takeo, Kampot, Kampong Speu, Kampong Chhnang, Kandal, Prey Veng, Phnom Penh,Otdar Meanchey, Banteay Meanchey, Pursat, Battambang provinces			No	No	No	210	2000	Km2				2002	1		2002	7				650000		650000					38000	64371	59.0331	[{"adm1_code":791,"adm1_name":"Banteay Meanchey"},{"adm1_code":792,"adm1_name":"Battambang"},{"adm1_code":794,"adm1_name":"Kampong Chhnang"},{"adm1_code":795,"adm1_name":"Kampong Speu"},{"adm1_code":797,"adm1_name":"Kampot"},{"adm1_code":798,"adm1_name":"Kandal"},{"adm1_code":804,"adm1_name":"Otdar Meanchey"},{"adm1_code":806,"adm1_name":"Phnom Penh"},{"adm1_code":808,"adm1_name":"Prey Veng"},{"a…	2008-01-03	2023-09-25
2002-9487-SEN	No	nat-cli-dro-dro	Natural	Climatological	Drought	Drought			SEN	Senegal	Sub-Saharan Africa	Africa	NO DATA: all country was selected: Dakar, Diourbel, Fatick, Kaffrine, Kaolack, Kedougou, Kolda, Louga, Matam, Saint Louis, Sedhiou, Tambacounda, Thies, Ziguinchor provinces			No	No	No			Km2				2002	8		2002					284000		284000							59.0331	[{"adm1_code":1373,"adm1_name":"Kaolack"},{"adm1_code":1374,"adm1_name":"Kedougou"},{"adm1_code":1375,"adm1_name":"Kolda"},{"adm1_code":1376,"adm1_name":"Sedhiou"},{"adm1_code":1377,"adm1_name":"Tambacounda"},{"adm1_code":1378,"adm1_name":"Kaffrine"},{"adm1_code":2636,"adm1_name":"Dakar"},{"adm1_code":2644,"adm1_name":"Thies"},{"adm1_code":2645,"adm1_name":"Ziguinchor"},{"adm1_code":47585,"adm1_n…	2006-02-22	2023-09-25
2002-9535-GMB	No	nat-cli-dro-dro	Natural	Climatological	Drought	Drought			GMB	Gambia	Sub-Saharan Africa	Africa	NO DATA: all country selected: Central River, Kanifing Municipal Council, Lower River, North Bank, Upper River, West Coast provinces	Insufficient rains	Food shortage	No	Yes	No			Km2				2002	5		2002														59.0331	[{"adm1_code":1285,"adm1_name":"Central River"},{"adm1_code":1287,"adm1_name":"Lower River"},{"adm1_code":1288,"adm1_name":"North Bank"},{"adm1_code":1289,"adm1_name":"Upper River"},{"adm1_code":1290,"adm1_name":"West Coast"},{"adm1_code":112869,"adm1_name":"Kanifing Municipal Council"}]	2006-02-22	2023-09-25
2002-9564-CHN	No	nat-cli-dro-dro	Natural	Climatological	Drought	Drought			CHN	China	Eastern Asia	Asia	Hebei Sheng province			No	No	No		659	Km2				2002	9		2002					900000		900000							59.0331	[{"adm1_code":907,"adm1_name":"Hebei Sheng"}]	2006-02-22	2023-09-25
2002-9605-BRA	No	nat-cli-dro-dro	Natural	Climatological	Drought	Drought			BRA	Brazil	Latin America and the Caribbean	Americas	Minas Gerais, Paraiba, Rio Grande do Norte, Pernambuco, Piaui provinces			No	No	Yes			Km2				2002	9		2002														59.0331	[{"adm1_code":677,"adm1_name":"Minas Gerais"},{"adm1_code":679,"adm1_name":"Paraiba"},{"adm1_code":681,"adm1_name":"Pernambuco"},{"adm1_code":682,"adm1_name":"Piaui"},{"adm1_code":684,"adm1_name":"Rio Grande Do Norte"}]	2006-02-22	2023-09-25
2002-9611-AUS	No	nat-cli-dro-dro	Natural	Climatological	Drought	Drought			AUS	Australia	Australia and New Zealand	Oceania	Queensland, New South Wales provinces	El Nino	Wildfire	No	No	No			Km2				2002	4		2002	11											2000000	3387927	59.0331	[{"adm1_code":470,"adm1_name":"New South Wales"},{"adm1_code":473,"adm1_name":"Queensland"}]	2006-03-08	2023-09-25
2002-9707-MDG	No	nat-cli-dro-dro	Natural	Climatological	Drought	Drought			MDG	Madagascar	Sub-Saharan Africa	Africa	Amoron I Mania, Androy, Anosy, Atsimo Andrefana, Atsimo Atsinanana, Haute Matsiatra, Ihorombe, Menabe, Vatovavy Fitovinany provinces (South regions)		Famine	No	No	No		0	Km2				2002	11		2004					600000		600000							59.0331	[{"adm1_code":41751,"adm1_name":"Amoron I Mania"},{"adm1_code":41754,"adm1_name":"Androy"},{"adm1_code":41755,"adm1_name":"Anosy"},{"adm1_code":41756,"adm1_name":"Atsimo Andrefana"},{"adm1_code":41757,"adm1_name":"Atsimo Atsinanana"},{"adm1_code":41763,"adm1_name":"Haute Matsiatra"},{"adm1_code":41764,"adm1_name":"Ihorombe"},{"adm1_code":41767,"adm1_name":"Menabe"},{"adm1_code":41771,"adm1_name":…	2006-02-22	2023-09-25
2002-9838-HND	No	nat-cli-dro-dro	Natural	Climatological	Drought	Drought			HND	Honduras	Latin America and the Caribbean	Americas	Liure, Soledad districts (Paraiso province), Orocuina, El Corpus districts (Choculeta province)			No	No	Yes		128	Km2				2002	1		2002					220000		220000							59.0331	[{"adm2_code":17220,"adm2_name":"El Corpus"},{"adm2_code":17225,"adm2_name":"Orocuina"},{"adm2_code":17440,"adm2_name":"Liure"},{"adm2_code":17447,"adm2_name":"Soledad"}]	2006-02-22	2023-09-25
2002-9843-PER	No	nat-cli-dro-dro	Natural	Climatological	Drought	Drought			PER	Peru	Latin America and the Caribbean	Americas	Amazonas, Ancash, Apurimac, Arequipa, Ayacucho, Cajamarca, Callao, Cusco, Huancavelica, Huanuco, Ica, Junin, La Libertad, Lambayeque, Lima, Loreto, Madre de Dios, Moquegua, Pasco, Piura, Puno, San Martin, Tacna, Tumbes, Ucayali provinces			No	No	No		0	Km2				2002	3		2002					21500		21500							59.0331	[{"adm1_code":2328,"adm1_name":"Amazonas"},{"adm1_code":2329,"adm1_name":"Ancash"},{"adm1_code":2330,"adm1_name":"Apurímac"},{"adm1_code":2331,"adm1_name":"Arequipa"},{"adm1_code":2332,"adm1_name":"Ayacucho"},{"adm1_code":2333,"adm1_name":"Cajamarca"},{"adm1_code":2334,"adm1_name":"Callao"},{"adm1_code":2335,"adm1_name":"Cusco"},{"adm1_code":2336,"adm1_name":"Huancavelica"},{"adm1_code":2337,"adm…	2006-02-22	2023-09-25
2002-9852-UGA	No	nat-cli-dro-dro	Natural	Climatological	Drought	Drought			UGA	Uganda	Sub-Saharan Africa	Africa	Kaabong, Kotido, Abim, Moroto, Nakapiripirit provinces (Karamoja region)		Food shortage	No	No	No		0	Km2				2002	6		2002			79		655000		655000							59.0331	[{"adm1_code":743,"adm1_name":"Abim"},{"adm1_code":765,"adm1_name":"Kotido"},{"adm1_code":772,"adm1_name":"Moroto"},{"adm1_code":773,"adm1_name":"Nakapiripirit"},{"adm1_code":47074,"adm1_name":"Kaabong"}]	2006-02-22	2023-09-25
2002-9853-USA	No	nat-cli-dro-dro	Natural	Climatological	Drought	Drought			USA	United States of America	Northern America	Americas	Illinois, Indiana, Iowa, Kansas, Michigan, Minnesota, Missouri, Nebraska, North Dakota, Ohio, South Dakota, Wisconsin provinces			No	No	No			Km2				2002	7		2002	8											3300000	5590080	59.0331	[{"adm1_code":3227,"adm1_name":"Illinois"},{"adm1_code":3228,"adm1_name":"Indiana"},{"adm1_code":3229,"adm1_name":"Iowa"},{"adm1_code":3230,"adm1_name":"Kansas"},{"adm1_code":3236,"adm1_name":"Michigan"},{"adm1_code":3237,"adm1_name":"Minnesota"},{"adm1_code":3239,"adm1_name":"Missouri"},{"adm1_code":3241,"adm1_name":"Nebraska"},{"adm1_code":3248,"adm1_name":"North Dakota"},{"adm1_code":3249,"adm…	2006-03-08	2023-09-25
2002-9854-CHN	No	nat-cli-dro-dro	Natural	Climatological	Drought	Drought			CHN	China	Eastern Asia	Asia	Shandong Sheng province			No	No	No			Km2				2002	6	1	2002	10	30			3660000		3660000					1210000	2049696	59.0331	[{"adm1_code":921,"adm1_name":"Shandong Sheng"}]	2006-07-27	2023-09-25
2003-9035-MOZ	No	nat-cli-dro-dro	Natural	Climatological	Drought	Drought			MOZ	Mozambique	Sub-Saharan Africa	Africa	Magoe, Zumbu, Cahora Bassa, Changara, Moatize, Chiuta, Mutarara districts (Tete province)			No	No	No		0	Km2				2003	1		2003	1		9		119500		119500							60.3733	[{"adm2_code":21935,"adm2_name":"Cahora Bassa"},{"adm2_code":21936,"adm2_name":"Changara"},{"adm2_code":21938,"adm2_name":"Chiuta"},{"adm2_code":21940,"adm2_name":"Magoe"},{"adm2_code":21942,"adm2_name":"Moatize"},{"adm2_code":21943,"adm2_name":"Mutarara"},{"adm2_code":21945,"adm2_name":"Zumbu"}]	2006-02-15	2023-09-25
2003-9064-CHN	No	nat-cli-dro-dro	Natural	Climatological	Drought	Drought			CHN	China	Eastern Asia	Asia	Nei Mongol Zizhiqu province			No	No	No		500000	Km2				2003	1		2003	1				48000000		48000000							60.3733	[{"adm1_code":917,"adm1_name":"Nei Mongol Zizhiqu"}]	2006-02-15	2023-09-25
2003-9360-CHN	No	nat-cli-dro-dro	Natural	Climatological	Drought	Drought			CHN	China	Eastern Asia	Asia	Hunan Sheng, Jiangxi Sheng, Zhejiang Sheng, Fujian Sheng provinces	Lack of precipation, heat wave	Fire	No	No	No		8600	Km2				2003	7		2003					3000000		3000000							60.3733	[{"adm1_code":901,"adm1_name":"Fujian Sheng"},{"adm1_code":912,"adm1_name":"Hunan Sheng"},{"adm1_code":914,"adm1_name":"Jiangxi Sheng"},{"adm1_code":930,"adm1_name":"Zhejiang Sheng"}]	2006-02-15	2023-09-25
2003-9651-BDI	No	nat-cli-dro-dro	Natural	Climatological	Drought	Drought			BDI	Burundi	Sub-Saharan Africa	Africa	Kirundo, Muyinga, Ngozi, Kayanza, Muramvya, Bujumbura Rural, Ruyigi, Gitega, Bubanza, Makamba provinces			No	No	No			Km2				2003	9		2004														60.3733	[{"adm1_code":40542,"adm1_name":"Bubanza"},{"adm1_code":40544,"adm1_name":"Bujumbura Rural"},{"adm1_code":40548,"adm1_name":"Gitega"},{"adm1_code":40550,"adm1_name":"Kayanza"},{"adm1_code":40551,"adm1_name":"Kirundo"},{"adm1_code":40552,"adm1_name":"Makamba"},{"adm1_code":40553,"adm1_name":"Muramvya"},{"adm1_code":40554,"adm1_name":"Muyinga"},{"adm1_code":40556,"adm1_name":"Ngozi"},{"adm1_code":4…	2006-02-15	2023-09-25
2003-9651-RWA	No	nat-cli-dro-dro	Natural	Climatological	Drought	Drought			RWA	Rwanda	Sub-Saharan Africa	Africa	Gatsibo, Nyagatare, Bugesera district (East/Iburasirazuba province), Kibungo city (Ngoma district, East/Iburasirazuba province), Gisagara, Huye, Nyanza, Nyamagabe, Nyaruguru, Kamonyi, Muhanga, Ruhango districts (South/Amajyepfo province)			No	No	No			Km2				2003	3		2007					1000000		1000000							60.3733	[{"adm2_code":21974,"adm2_name":"Bugesera"},{"adm2_code":21978,"adm2_name":"Gatsibo"},{"adm2_code":21989,"adm2_name":"Ngoma"},{"adm2_code":21992,"adm2_name":"Nyagatare"},{"adm2_code":21980,"adm2_name":"Gisagara"},{"adm2_code":21981,"adm2_name":"Huye"},{"adm2_code":21982,"adm2_name":"Kamonyi"},{"adm2_code":21987,"adm2_name":"Muhanga"},{"adm2_code":21993,"adm2_name":"Nyamagabe"},{"adm2_code":21995,…	2007-09-06	2023-09-25
2003-9651-TZA	No	nat-cli-dro-dro	Natural	Climatological	Drought	Drought			TZA	United Republic of Tanzania	Sub-Saharan Africa	Africa	Kaskazini Unguja, Mjini Magharibi, Kusini Unguja, Singida, Dodoma, Shinyanga, Mwanza, Tabora, Kagera, Kigoma provinces			No	No	No			Km2				2003	8		2004					1900000		1900000							60.3733	[{"adm1_code":48359,"adm1_name":"Dodoma"},{"adm1_code":48362,"adm1_name":"Kigoma"},{"adm1_code":48372,"adm1_name":"Kaskazini Unguja"},{"adm1_code":48377,"adm1_name":"Singida"},{"adm1_code":48379,"adm1_name":"Kusini Unguja"},{"adm1_code":48380,"adm1_name":"Tabora"},{"adm1_code":48382,"adm1_name":"Mjini Magharibi"},{"adm1_code":115004,"adm1_name":"Kagera"},{"adm1_code":115006,"adm1_name":"Mwanza"},…	2006-02-13	2023-09-25
2003-9758-HTI	No	nat-cli-dro-dro	Natural	Climatological	Drought	Drought			HTI	Haiti	Latin America and the Caribbean	Americas	Saint Nicolas, Bombardopolis, Baie-de-Henne, Jean Rabel towns (Mole Saint Nicolas district, Nord Ouest province)	Irregular and insufficient rainfall in 2001 and 2002	Food shortage	No	No	No			Km2				2003	2		2004					35000		35000							60.3733	[{"adm2_code":17184,"adm2_name":"Mole Saint Nicolas"}]	2006-02-15	2023-09-25
2003-9760-IDN	No	nat-cli-dro-dro	Natural	Climatological	Drought	Drought			IDN	Indonesia	South-eastern Asia	Asia	Belu, Timor Tengah Selatan, Timor Tengah Utara, Kupang districts (West Timor region, Nusatenggara Timur province)			No	No	No			Km2				2003	8		2003	9				15000		15000					1000	1656	60.3733	[{"adm2_code":18150,"adm2_name":"Belu"},{"adm2_code":18159,"adm2_name":"Timor Tengah Selatan"},{"adm2_code":18160,"adm2_name":"Timor Tengah Utara"},{"adm2_code":73765,"adm2_name":"Kupang"}]	2006-03-08	2023-09-25
2003-9772-ETH	No	nat-cli-dro-dro	Natural	Climatological	Drought	Drought			ETH	Ethiopia	Sub-Saharan Africa	Africa	Tigray, Oromia, Amhara, Somali, Afar provinces	Crop failure, lack pasture, poor/erratic long rains		No	No	No			Km2				2003			2004					12600000		12600000							60.3733	[{"adm1_code":1228,"adm1_name":"Afar"},{"adm1_code":1229,"adm1_name":"Amhara"},{"adm1_code":1237,"adm1_name":"Tigray"},{"adm1_code":47678,"adm1_name":"Oromia"},{"adm1_code":47679,"adm1_name":"Somali"}]	2006-02-15	2023-09-25
2003-9777-RUS	No	nat-cli-dro-dro	Natural	Climatological	Drought	Drought			RUS	Russian Federation	Eastern Europe	Europe	Vladisvostok city (Primorskiy Kray province)		Water shortage	No	No	No			Km2				2003			2003					1000000		1000000							60.3733	[{"adm1_code":2547,"adm1_name":"Primorskiy Kray"}]	2006-02-15	2023-09-25
2003-9784-BIH	No	nat-cli-dro-dro	Natural	Climatological	Drought	Drought			BIH	Bosnia and Herzegovina	Southern Europe	Europe	Republika Srpska province, Posavski district (Federacija Bosne I Hercegovine province), Neretvljanski district (Federacija Bosne I Hercegovine province)			No	No	No			Km2				2003	5		2003					62575		62575					140000	231891	60.3733	[{"adm1_code":653,"adm1_name":"Republika Srpska"},{"adm2_code":6242,"adm2_name":"Neretvljanski"},{"adm2_code":6243,"adm2_name":"Posavski"}]	2007-04-16	2023-09-25
2003-9784-HRV	No	nat-cli-dro-dro	Natural	Climatological	Drought	Drought			HRV	Croatia	Southern Europe	Europe	Bjelovar-bilogora, Dubrovnik-Neretva, Grad Zagreb, Istra, Karlovac, Koprivnica-krizevci, Krapina-zagorje, Lika-senj, Medimurje, Osijek-baranja, Pozega-slavonija, Primorje-gorski Kota, Šibenik, Sisak-moslavina, Slavonski Brod-posav, Split-dalmatija, Varazdin, Virovitica-podravina, Vukovar-srijem, Zadar-Knin provinces		Heat wave	No	No	No			Km2				2003	2		2003	5	21										330000	546600	60.3733	[{"adm1_code":988,"adm1_name":"Bjelovar-bilogora"},{"adm1_code":989,"adm1_name":"Dubrovnik-neretva"},{"adm1_code":990,"adm1_name":"Grad Zagreb"},{"adm1_code":991,"adm1_name":"Istra"},{"adm1_code":992,"adm1_name":"Karlovac"},{"adm1_code":993,"adm1_name":"Koprivnica-krizevci"},{"adm1_code":994,"adm1_name":"Krapina-zagorje"},{"adm1_code":995,"adm1_name":"Lika-senj"},{"adm1_code":996,"adm1_name":"Med…	2006-02-15	2023-09-25
2003-9784-HUN	No	nat-cli-dro-dro	Natural	Climatological	Drought	Drought			HUN	Hungary	Eastern Europe	Europe	Bacs-kiskun, Baranya, Bekes, Borsod-abauj-zemplen, Budapest, Csongrád, Fejér, Gyor-moson-sopron, Hadju-bihar, Heves, Jasz-nagykun-seolnok, Komarom-esztergom, Nógrád, Pest, Somogy, Szabolcs-szatmar-bereg, Tolna, Vas, Veszprém, Zala provinces	Heat wave		No	No	No			Km2				2003	7		2003	8											100000	165636	60.3733	[{"adm1_code":1440,"adm1_name":"Bacs-kiskun"},{"adm1_code":1441,"adm1_name":"Baranya"},{"adm1_code":1442,"adm1_name":"Bekes"},{"adm1_code":1443,"adm1_name":"Borsod-abauj-zemplen"},{"adm1_code":1444,"adm1_name":"Budapest"},{"adm1_code":1445,"adm1_name":"Csongrad"},{"adm1_code":1446,"adm1_name":"Fejer"},{"adm1_code":1447,"adm1_name":"Gyor-moson-sopron"},{"adm1_code":1448,"adm1_name":"Hajdu-bihar"},…	2006-03-08	2023-09-25
2003-9785-ARG	No	nat-cli-dro-dro	Natural	Climatological	Drought	Drought			ARG	Argentina	Latin America and the Caribbean	Americas	Buenos Aires, Buenos Aires D.f., Entre Rios, Santa Fe provinces			No	No	No			Km2				2003	6		2003	9											120000	198764	60.3733	[{"adm1_code":429,"adm1_name":"Buenos Aires"},{"adm1_code":430,"adm1_name":"Buenos Aires D.f."},{"adm1_code":436,"adm1_name":"Entre Rios"},{"adm1_code":449,"adm1_name":"Santa Fe"}]	2006-10-26	2023-09-25
2004-9017-ZAF	No	nat-cli-dro-dro	Natural	Climatological	Drought	Drought			ZAF	South Africa	Sub-Saharan Africa	Africa	KwaZulu-Natal, Eastern Cape, Northern Cape, Mpumalanga, North-West, Free state, Limpopo provinces			No	No	Yes			Km2				2004	1		2004					15000000		15000000							61.9896	[{"adm1_code":2707,"adm1_name":"Free State"},{"adm1_code":77310,"adm1_name":"Eastern Cape"},{"adm1_code":77311,"adm1_name":"KwaZulu-Natal"},{"adm1_code":77312,"adm1_name":"Limpopo"},{"adm1_code":77313,"adm1_name":"Mpumalanga"},{"adm1_code":77314,"adm1_name":"North West"},{"adm1_code":77315,"adm1_name":"Northern Cape"}]	2006-10-26	2023-09-25
2004-9063-PER	No	nat-cli-dro-dro	Natural	Climatological	Drought	Drought			PER	Peru	Latin America and the Caribbean	Americas	Cajamarca province		Cold wave	No	No	Yes			Km2				2004	1		2004														61.9896	[{"adm1_code":2333,"adm1_name":"Cajamarca"}]	2006-02-13	2023-09-25
2004-9085-SOM	No	nat-cli-dro-dro	Natural	Climatological	Drought	Drought			SOM	Somalia	Sub-Saharan Africa	Africa	Sool, Sanaag, Togdheer, Nugaal, Galgaduud, Hiraan, Mudug, Bari provinces		Food shortage	No	No	No			Km2				2004	1		2004	1				200000		200000							61.9896	[{"adm1_code":2690,"adm1_name":"Bari"},{"adm1_code":2693,"adm1_name":"Galgaduud"},{"adm1_code":2695,"adm1_name":"Hiraan"},{"adm1_code":2700,"adm1_name":"Mudug"},{"adm1_code":2701,"adm1_name":"Nugaal"},{"adm1_code":2702,"adm1_name":"Sanaag"},{"adm1_code":2703,"adm1_name":"Sool"},{"adm1_code":2704,"adm1_name":"Togdheer"}]	2006-02-13	2023-09-25
2004-9288-KEN	No	nat-cli-dro-dro	Natural	Climatological	Drought	Drought			KEN	Kenya	Sub-Saharan Africa	Africa	Kitui, Mbeere, Mwingi, Marsabit districts (Eastern province), Turkana, Kajiado, Narok districts (Rift Valley province), Mandera, Wajir, Garissa, Ijara districts (North Eastern province), Tana river, Kilifi, Kwale, Taita Taveta, Malindi districts (Coast province), Nyanza, Central provinces	Poor rainfall	Crop failure|Food shortage	No	No	No			Km2				2004	7		2004			80		2300000		2300000							61.9896	[{"adm1_code":51325,"adm1_name":"Central"},{"adm1_code":51330,"adm1_name":"Nyanza"},{"adm2_code":51340,"adm2_name":"Kilifi"},{"adm2_code":51341,"adm2_name":"Kwale"},{"adm2_code":51343,"adm2_name":"Malindi"},{"adm2_code":51345,"adm2_name":"Taita Taveta"},{"adm2_code":51346,"adm2_name":"Tana River"},{"adm2_code":51349,"adm2_name":"Kitui"},{"adm2_code":51352,"adm2_name":"Marsabit"},{"adm2_code":5135…	2006-02-13	2023-09-25
2004-9332-CUB	No	nat-cli-dro-dro	Natural	Climatological	Drought	Drought			CUB	Cuba	Latin America and the Caribbean	Americas	Holguin, Las Tunas, Camaguey, La Habane provinces			No	No	No			Km2				2004	8		2004												3139	5064	61.9896	[{"adm1_code":1009,"adm1_name":"Camaguey"},{"adm1_code":1015,"adm1_name":"Holguin"},{"adm1_code":1017,"adm1_name":"La Habana"},{"adm1_code":1018,"adm1_name":"Las Tunas"}]	2006-02-13	2023-09-25
2004-9363-HND	No	nat-cli-dro-dro	Natural	Climatological	Drought	Drought			HND	Honduras	Latin America and the Caribbean	Americas	Atlantida, Choluteca, Colon, Comayagua, Copan, Cortes, Francisco Morazan, Gracias A Dios, Intibuca, Islas De Bahia, La Paz, Lempira, Name Unknown, Ocotepeque, Olancho, Paraiso, Santa Barbara, Valle, Yoro provinces		Food shortage	No	No	Yes			Km2				2004	7		2004					137500		137500							61.9896	[{"adm1_code":1420,"adm1_name":"Atlantida"},{"adm1_code":1421,"adm1_name":"Choluteca"},{"adm1_code":1422,"adm1_name":"Colon"},{"adm1_code":1423,"adm1_name":"Comayagua"},{"adm1_code":1424,"adm1_name":"Copan"},{"adm1_code":1425,"adm1_name":"Cortes"},{"adm1_code":1426,"adm1_name":"Francisco Morazan"},{"adm1_code":1427,"adm1_name":"Gracias A Dios"},{"adm1_code":1428,"adm1_name":"Intibuca"},{"adm1_cod…	2006-02-13	2023-09-25
2004-9480-AGO	No	nat-cli-dro-dro	Natural	Climatological	Drought	Drought			AGO	Angola	Sub-Saharan Africa	Africa	Cunene, Cuanza-Sul provinces		Food shortage	No	No	No			Km2				2004	9		2005					25000		25000							61.9896	[{"adm1_code":403,"adm1_name":"Cuanza Sul"},{"adm1_code":404,"adm1_name":"Cunene"}]	2006-02-13	2023-09-25
2004-9576-BOL	No	nat-cli-dro-dro	Natural	Climatological	Drought	Drought			BOL	Bolivia (Plurinational State of)	Latin America and the Caribbean	Americas	Beni, Chuquisaca, Cochabamba, Santa Cruz, Tarija provinces			No	No	Yes			Km2				2004	10		2005					55000		55000							61.9896	[{"adm1_code":40443,"adm1_name":"Beni"},{"adm1_code":40444,"adm1_name":"Chuquisaca"},{"adm1_code":40445,"adm1_name":"Cochabamba"},{"adm1_code":40449,"adm1_name":"Santa Cruz"},{"adm1_code":40450,"adm1_name":"Tarija"}]	2006-02-13	2023-09-25
2004-9577-TZA	No	nat-cli-dro-dro	Natural	Climatological	Drought	Drought			TZA	United Republic of Tanzania	Sub-Saharan Africa	Africa	Arusha, Kilimanjaro, Manyara, Tanga provinces (Northern Highlands region), Pwani, Dar-es-salaam provinces (Northern Coast region).		Food shortage	No	No	No			Km2				2004	10		2004					254000		254000							61.9896	[{"adm1_code":48357,"adm1_name":"Arusha"},{"adm1_code":48358,"adm1_name":"Dar-es-salaam"},{"adm1_code":48363,"adm1_name":"Kilimanjaro"},{"adm1_code":48365,"adm1_name":"Manyara"},{"adm1_code":48373,"adm1_name":"Pwani"},{"adm1_code":48381,"adm1_name":"Tanga"}]	2006-02-13	2023-09-25
2004-9704-PRT	No	nat-cli-dro-dro	Natural	Climatological	Drought	Drought			PRT	Portugal	Southern Europe	Europe	All country: all provinces selected	Lack of rain		No	No	No			Km2				2004	9		2005												1338136	2158646	61.9896	[{"adm1_code":2386,"adm1_name":"Aveiro"},{"adm1_code":2387,"adm1_name":"Beja"},{"adm1_code":2388,"adm1_name":"Braga"},{"adm1_code":2389,"adm1_name":"Braganca"},{"adm1_code":2390,"adm1_name":"Castelo Branco"},{"adm1_code":2391,"adm1_name":"Coimbra"},{"adm1_code":2392,"adm1_name":"Evora"},{"adm1_code":2393,"adm1_name":"Faro"},{"adm1_code":2394,"adm1_name":"Guarda"},{"adm1_code":2405,"adm1_name":"Le…	2006-02-13	2023-09-25
2004-9705-BRA	No	nat-cli-dro-dro	Natural	Climatological	Drought	Drought			BRA	Brazil	Latin America and the Caribbean	Americas	Rio Grande Do Sul, Paraiba, Ceara, Piaui, Sergipe, Alagoas, Bahia, Rio Grande do Norte, Pernambuco provinces	Lack of rain		No	No	No			Km2				2004	12		2005	3											1650000	2661737	61.9896	[{"adm1_code":666,"adm1_name":"Alagoas"},{"adm1_code":669,"adm1_name":"Bahia"},{"adm1_code":670,"adm1_name":"Ceara"},{"adm1_code":679,"adm1_name":"Paraiba"},{"adm1_code":681,"adm1_name":"Pernambuco"},{"adm1_code":682,"adm1_name":"Piaui"},{"adm1_code":684,"adm1_name":"Rio Grande Do Norte"},{"adm1_code":685,"adm1_name":"Rio Grande Do Sul"},{"adm1_code":690,"adm1_name":"Sergipe"}]	2007-01-08	2023-09-25
2005-9067-BDI	No	nat-cli-dro-dro	Natural	Climatological	Drought	Drought			BDI	Burundi	Sub-Saharan Africa	Africa	Busoni, Bugabira, Ntega, Kirundo districts (Kirundo province), Ruyigi, Cankuzo, Rutana, Muyinga provinces	Lack of rain, prolonged dry season	Crop failure|Famine	No	Yes	Yes			Km2				2005	1		2006	1		120		2150000		2150000							64.0927	[{"adm1_code":40546,"adm1_name":"Cankuzo"},{"adm1_code":40554,"adm1_name":"Muyinga"},{"adm1_code":40557,"adm1_name":"Rutana"},{"adm1_code":40558,"adm1_name":"Ruyigi"},{"adm2_code":40638,"adm2_name":"Bugabira"},{"adm2_code":40639,"adm2_name":"Busoni"},{"adm2_code":40642,"adm2_name":"Kirundo"},{"adm2_code":40643,"adm2_name":"Ntega"}]	2006-02-25	2023-09-25
2005-9142-MLI	No	nat-cli-dro-dro	Natural	Climatological	Drought	Drought			MLI	Mali	Sub-Saharan Africa	Africa	Mopti, Kayes, Tombouctou, Gao provinces		Food shortage	No	No	No			Km2				2005			2006					1000000		1000000							64.0927	[{"adm1_code":1927,"adm1_name":"Gao"},{"adm1_code":1928,"adm1_name":"Kayes"},{"adm1_code":1931,"adm1_name":"Mopti"},{"adm1_code":1934,"adm1_name":"Tombouctou"}]	2007-02-14	2023-09-25
2005-9153-THA	No	nat-cli-dro-dro	Natural	Climatological	Drought	Drought			THA	Thailand	South-eastern Asia	Asia	Ang Thong, Bangkok, Buriram, Chachoengsao, Chainat, Chaiyaphum, Chanthaburi, Chiang Mai, Chiang Rai, Chonburi, Chumphon, Kalasin, Kampaeng Phet, Kanchanaburi, Khon Kaen, Krabi, Lampang, Lamphun, Loei, Lopburi, Mae Hong Son, Maha Sarakham, Mukdahan, Nakhon Nayok, Nakhon Pathom, Nakhon Phanom, Nakhon Ratchasima, Nakhon Sawan, Nakhon Si Thammarat, Nan Narathiwat, Nong Khai, Nonthaburi, Pathum Thani,…			No	No	No		21600	Km2				2005	1		2005	3											420000	655300	64.0927	[{"adm1_code":2851,"adm1_name":"Amnat Charoen"},{"adm1_code":2852,"adm1_name":"Ang Thong"},{"adm1_code":2853,"adm1_name":"Bangkok"},{"adm1_code":2854,"adm1_name":"Buriram"},{"adm1_code":2855,"adm1_name":"Chachoengsao"},{"adm1_code":2856,"adm1_name":"Chainat"},{"adm1_code":2857,"adm1_name":"Chaiyaphum"},{"adm1_code":2858,"adm1_name":"Chanthaburi"},{"adm1_code":2859,"adm1_name":"Chiang Mai"},{"adm1…	2006-03-07	2023-09-25
2005-9163-UGA	No	nat-cli-dro-dro	Natural	Climatological	Drought	Drought			UGA	Uganda	Sub-Saharan Africa	Africa	Rupa, Nadunget subcounties (Moroto province); Nyakwae subcounty (Abim province); Kalapata city (Dodoth district, Kaabong province) (Karamoja region)			No	No	No			Km2				2005	3		2006	3				600000		600000							64.0927	[{"adm1_code":743,"adm1_name":"Abim"},{"adm1_code":765,"adm1_name":"Kotido"},{"adm1_code":772,"adm1_name":"Moroto"},{"adm2_code":28453,"adm2_name":"Dodoth"}]	2006-03-09	2023-09-25
2005-9206-KHM	No	nat-cli-dro-dro	Natural	Climatological	Drought	Drought			KHM	Cambodia	South-eastern Asia	Asia	Kampong Speu province		Food shortage|Heat wave	No	No	No			Km2				2005	4		2005	4				600000		600000							64.0927	[{"adm1_code":795,"adm1_name":"Kampong Speu"}]	2005-04-19	2023-09-25
2005-9213-DJI	No	nat-cli-dro-dro	Natural	Climatological	Drought	Drought			DJI	Djibouti	Sub-Saharan Africa	Africa	Tadjourah district (Tadjourah province), Dikhil district (Dikhil province), Ali Sabieh district (Ali Sabieh province), Obock district (Obock province)	Two consecutive failed rainy seasons	Famine	No	No	Yes	2800		Km2				2005	4		2006	4				150000		150000							64.0927	[{"adm2_code":15272,"adm2_name":"Ali Sabieh"},{"adm2_code":15274,"adm2_name":"Dikhil"},{"adm2_code":15278,"adm2_name":"Obock"},{"adm2_code":15282,"adm2_name":"Tadjourah"}]	2007-02-13	2023-09-25
2005-9238-CMR	No	nat-cli-dro-dro	Natural	Climatological	Drought	Drought			CMR	Cameroon	Sub-Saharan Africa	Africa	Logone-Et-Chari disctrict (Extrème-Nord province)		Famine	No	No	No			Km2				2005	3		2005	5													64.0927	[{"adm2_code":12482,"adm2_name":"Logone - Et - Chari"}]	2005-09-05	2023-09-25
2005-9262-MOZ	No	nat-cli-dro-dro	Natural	Climatological	Drought	Drought			MOZ	Mozambique	Sub-Saharan Africa	Africa	Maputo, Gaza, Inhambane, Manica, Sofala, Zambezia, Tete provinces	Poor and erratic rainfall	Crop failure|Food shortage	No	No	No			Km2				2005	5		2006					1400000		1400000							64.0927	[{"adm1_code":2113,"adm1_name":"Gaza"},{"adm1_code":2114,"adm1_name":"Inhambane"},{"adm1_code":2115,"adm1_name":"Manica"},{"adm1_code":2120,"adm1_name":"Sofala"},{"adm1_code":2121,"adm1_name":"Tete"},{"adm1_code":2122,"adm1_name":"Zambezia"},{"adm1_code":41373,"adm1_name":"Maputo"}]	2007-02-15	2023-09-25
2005-9277-VNM	No	nat-cli-dro-dro	Natural	Climatological	Drought	Drought			VNM	Viet Nam	South-eastern Asia	Asia	Ben Tre province			No	No	No			Km2				2005	5		2005					410000		410000					42120	65717	64.0927	[{"adm1_code":3332,"adm1_name":"Ben Tre"}]	2005-03-06	2023-09-25
2005-9362-NER	No	nat-cli-dro-dro	Natural	Climatological	Drought	Drought			NER	Niger	Sub-Saharan Africa	Africa	Tillaberi, Tahoua, Diffa, Zinder, Maradi provinces	Drought and locusts infestation	Famine|Food shortage	Yes	No	No	100588		Km2				2005	7		2006	7				3000000		3000000							64.0927	[{"adm1_code":2203,"adm1_name":"Diffa"},{"adm1_code":2205,"adm1_name":"Maradi"},{"adm1_code":2207,"adm1_name":"Tahoua"},{"adm1_code":2208,"adm1_name":"Tillaberi"},{"adm1_code":2209,"adm1_name":"Zinder"}]	2007-10-04	2023-09-25
2005-9403-ZMB	No	nat-cli-dro-dro	Natural	Climatological	Drought	Drought			ZMB	Zambia	Sub-Saharan Africa	Africa	Southern, Western provinces		Food shortage	No	No	No			Km2				2005	6		2005	11				1200000		1200000							64.0927	[{"adm1_code":3433,"adm1_name":"Southern"},{"adm1_code":3434,"adm1_name":"Western"}]	2007-02-15	2023-09-25
2005-9569-BRA	No	nat-cli-dro-dro	Natural	Climatological	Drought	Drought			BRA	Brazil	Latin America and the Caribbean	Americas	Manaquiri, Atalaia Do Norte, Anori, Caapiranga districts (Amazonas province)	Lack of rain		No	No	No			Km2				2005	10		2005	10													64.0927	[{"adm2_code":6475,"adm2_name":"Anori"},{"adm2_code":6477,"adm2_name":"Atalaia Do Norte"},{"adm2_code":6486,"adm2_name":"Caapiranga"},{"adm2_code":6508,"adm2_name":"Manaquiri"}]	2005-10-17	2023-09-25
2005-9578-MWI	No	nat-cli-dro-dro	Natural	Climatological	Drought	Drought			MWI	Malawi	Sub-Saharan Africa	Africa	Southern Region, Central Region provinces	Poor rainfall and indequater supplies of fertlizer	Famine|Food shortage	No	No	No			Km2				2005	10		2006	3				5100000		5100000							64.0927	[{"adm1_code":1888,"adm1_name":"Central Region"},{"adm1_code":1890,"adm1_name":"Southern Region"}]	2007-02-13	2023-09-25
2005-9637-MDG	No	nat-cli-dro-dro	Natural	Climatological	Drought	Drought			MDG	Madagascar	Sub-Saharan Africa	Africa	Vangaindrano district (Atsimo Atsinanana province)	Locust infestation, repeated floods, pest infestation	Famine|Food shortage	No	No	No			Km2				2005	11		2006	12				14000		14000							64.0927	[{"adm2_code":154550,"adm2_name":"Vangaindrano"}]	2007-02-13	2023-09-25
2005-9719-KEN	No	nat-cli-dro-dro	Natural	Climatological	Drought	Drought			KEN	Kenya	Sub-Saharan Africa	Africa	Makueni, Kitui, Marsabit, Isiolo, Mwingi, Kitui, Moyale districts (Eastern province), Malindi, Kwale, Kilifi, Taita Taveta, Tana river districts (Coast province), Mandera, Wajir, Garissa, Ijara districts (North Eastern province), Kajiado, Turkana, Samburu, Laikipia districts (Rift Valley province).	Lack of rains	Famine	No	Yes	Yes			Km2				2005	12		2006			27		3500000		3500000							64.0927	[{"adm2_code":51340,"adm2_name":"Kilifi"},{"adm2_code":51341,"adm2_name":"Kwale"},{"adm2_code":51343,"adm2_name":"Malindi"},{"adm2_code":51345,"adm2_name":"Taita Taveta"},{"adm2_code":51346,"adm2_name":"Tana River"},{"adm2_code":51348,"adm2_name":"Isiolo"},{"adm2_code":51349,"adm2_name":"Kitui"},{"adm2_code":51351,"adm2_name":"Makueni"},{"adm2_code":51352,"adm2_name":"Marsabit"},{"adm2_code":5135…	2007-09-06	2023-09-25
2005-9722-SOM	No	nat-cli-dro-dro	Natural	Climatological	Drought	Drought			SOM	Somalia	Sub-Saharan Africa	Africa	Gedo, Bakool, Bay, Hiraan, Juba Hoose, Juba Dhexe provinces		Food shortage	No	No	No			Km2				2005			2005			2											64.0927	[{"adm1_code":2689,"adm1_name":"Bakool"},{"adm1_code":2691,"adm1_name":"Bay"},{"adm1_code":2694,"adm1_name":"Gedo"},{"adm1_code":2695,"adm1_name":"Hiraan"},{"adm1_code":2696,"adm1_name":"Juba Hoose"},{"adm1_code":2698,"adm1_name":"Juba Dhexe"}]	2006-02-02	2023-09-25
2005-9734-PRY	No	nat-cli-dro-dro	Natural	Climatological	Drought	Drought			PRY	Paraguay	Latin America and the Caribbean	Americas	Presidente Hayes, Boqueron, Alto Paraguay provinces			No	No	No			Km2				2005	10	14	2005					52990		52990							64.0927	[{"adm1_code":2311,"adm1_name":"Alto Paraguay"},{"adm1_code":2314,"adm1_name":"Boqueron"},{"adm1_code":2326,"adm1_name":"Presidente Hayes"}]	2006-01-17	2023-09-25
2005-9745-CHN	No	nat-cli-dro-dro	Natural	Climatological	Drought	Drought			CHN	China	Eastern Asia	Asia	Guangdong Sheng province		Fire	No	No	No			Km2				2005	10		2005					174000		174000							64.0927	[{"adm1_code":903,"adm1_name":"Guangdong Sheng"}]	2007-01-17	2023-09-25
2005-9746-CHN	No	nat-cli-dro-dro	Natural	Climatological	Drought	Drought			CHN	China	Eastern Asia	Asia	Shanxi Sheng, Nei Mongol Zizhiqu, Ningxia Huizu Zizhiqu, Hunan Sheng, Guizhou Sheng provinces			No	No	No			Km2				2005	7	7	2005					7600000		7600000							64.0927	[{"adm1_code":905,"adm1_name":"Guizhou Sheng"},{"adm1_code":912,"adm1_name":"Hunan Sheng"},{"adm1_code":917,"adm1_name":"Nei Mongol Zizhiqu"},{"adm1_code":918,"adm1_name":"Ningxia Huizu Zizhiqu"},{"adm1_code":923,"adm1_name":"Shanxi Sheng"}]	2006-10-19	2023-09-25
2005-9747-ETH	No	nat-cli-dro-dro	Natural	Climatological	Drought	Drought			ETH	Ethiopia	Sub-Saharan Africa	Africa	Afder, Liben districts (Somali province), Gode zones (Shabelle district, Somali province), Borena district (Oromiya province)	Successive failed rainy seasons	Food shortage	No	No	No			Km2				2005	11		2006					2600000		2600000							64.0927	[{"adm2_code":47688,"adm2_name":"Borena"},{"adm2_code":40841,"adm2_name":"Afder"},{"adm2_code":40844,"adm2_name":"Shabelle"},{"adm2_code":47709,"adm2_name":"Liben"}]	2007-02-13	2023-09-25
2006-9016-PER	No	nat-cli-dro-dro	Natural	Climatological	Drought	Drought			PER	Peru	Latin America and the Caribbean	Americas	Tumbes, Piura, Ica, Arequipa provinces			No	No	Yes			Km2				2006	1		2006	1													66.1603	[{"adm1_code":2331,"adm1_name":"Arequipa"},{"adm1_code":2338,"adm1_name":"Ica"},{"adm1_code":2347,"adm1_name":"Piura"},{"adm1_code":2351,"adm1_name":"Tumbes"}]	2006-09-18	2023-09-25
2006-9233-GNB	No	nat-cli-dro-dro	Natural	Climatological	Drought	Drought			GNB	Guinea-Bissau	Sub-Saharan Africa	Africa	Quinara, Tombali provinces, Bolama/Bijagos Isl.(=province)		Famine	No	No	No			Km2				2006	5		2006	5				32000		32000							66.1603	[{"adm1_code":1387,"adm1_name":"Bolama/bijagos"},{"adm1_code":1391,"adm1_name":"Quinara"},{"adm1_code":1393,"adm1_name":"Tombali"}]	2006-05-08	2023-09-25
2006-9411-LTU	No	nat-cli-dro-dro	Natural	Climatological	Drought	Drought			LTU	Lithuania	Northern Europe	Europe	Alytaus, Kauno, Klaipedos, Marijampoles, Panevezio, Siauliu, Taurages, Telsiu, Utenos, Vilniaus provinces		Heat wave	No	No	Yes			Km2				2006	8		2006												225573	340949	66.1603	[{"adm1_code":1866,"adm1_name":"Alytaus"},{"adm1_code":1867,"adm1_name":"Kauno"},{"adm1_code":1868,"adm1_name":"Klaipedos"},{"adm1_code":1869,"adm1_name":"Marijampoles"},{"adm1_code":1870,"adm1_name":"Panevezio"},{"adm1_code":1871,"adm1_name":"Siauliu"},{"adm1_code":1872,"adm1_name":"Taurages"},{"adm1_code":1873,"adm1_name":"Telsiu"},{"adm1_code":1874,"adm1_name":"Utenos"},{"adm1_code":1875,"adm1…	2006-08-04	2023-09-25
2006-9425-MLI	No	nat-cli-dro-dro	Natural	Climatological	Drought	Drought			MLI	Mali	Sub-Saharan Africa	Africa	Kidal province	Scarcity of rain	Famine	No	Yes	No			Km2				2006	8		2006	9				25000		25000							66.1603	[{"adm1_code":1929,"adm1_name":"Kidal"}]	2006-09-16	2023-09-25
2006-9554-AUS	No	nat-cli-dro-dro	Natural	Climatological	Drought	Drought			AUS	Australia	Australia and New Zealand	Oceania	NO DATA: all country has been selected			No	No	No			Km2				2006	10		2006														66.1603	[{"adm1_code":468,"adm1_name":"Australian Capital Territory"},{"adm1_code":469,"adm1_name":"Coral Sea Islands Territory"},{"adm1_code":470,"adm1_name":"New South Wales"},{"adm1_code":471,"adm1_name":"Northern Territory"},{"adm1_code":472,"adm1_name":"Other Territories"},{"adm1_code":473,"adm1_name":"Queensland"},{"adm1_code":474,"adm1_name":"South Australia"},{"adm1_code":475,"adm1_name":"Tasmani…	2006-10-16	2023-09-25
2006-9570-AFG	No	nat-cli-dro-dro	Natural	Climatological	Drought	Drought			AFG	Afghanistan	Southern Asia	Asia	Badakhshan, Badghis, Baghlan, Balkh, Bamyan, Daykundi, Faryab, Ghor, Jawzjan, Kunduz, Samangan, Sar-e-Pul, Takhar, Uruzgan provinces			No	No	No	73511		Km2				2006	7		2006					1900000		1900000							66.1603	[{"adm1_code":272,"adm1_name":"Badakhshan"},{"adm1_code":273,"adm1_name":"Badghis"},{"adm1_code":274,"adm1_name":"Baghlan"},{"adm1_code":275,"adm1_name":"Balkh"},{"adm1_code":276,"adm1_name":"Bamyan"},{"adm1_code":278,"adm1_name":"Faryab"},{"adm1_code":280,"adm1_name":"Ghor"},{"adm1_code":283,"adm1_name":"Jawzjan"},{"adm1_code":289,"adm1_name":"Kunduz"},{"adm1_code":298,"adm1_name":"Samangan"},{"…	2006-12-19	2023-09-25
2006-9723-NPL	No	nat-cli-dro-dro	Natural	Climatological	Drought	Drought			NPL	Nepal	Southern Asia	Asia	Mid Western, Far Western provinces	Poor rainfall		No	No	No			Km2				2006	7		2006					200000		200000							66.1603	[{"adm1_code":2154,"adm1_name":"Far Western"},{"adm1_code":2155,"adm1_name":"Mid Western"}]	2007-02-15	2023-09-25
2006-9741-CHN	No	nat-cli-dro-dro	Natural	Climatological	Drought	Drought			CHN	China	Eastern Asia	Asia	Sichuan Sheng, Chongqing Shi, Guizhou Sheng, Zhejiang Sheng, Anhui Sheng, Jiangxi Sheng, Hunan Sheng, Hubei Sheng provinces		Heat wave	No	No	No			Km2				2006	5	1	2006	9	10	134		18000000		18000000					2910000	4398406	66.1603	[{"adm1_code":898,"adm1_name":"Anhui Sheng"},{"adm1_code":900,"adm1_name":"Chongqing Shi"},{"adm1_code":905,"adm1_name":"Guizhou Sheng"},{"adm1_code":911,"adm1_name":"Hubei Sheng"},{"adm1_code":912,"adm1_name":"Hunan Sheng"},{"adm1_code":914,"adm1_name":"Jiangxi Sheng"},{"adm1_code":924,"adm1_name":"Sichuan Sheng"},{"adm1_code":930,"adm1_name":"Zhejiang Sheng"}]	2008-03-29	2023-09-25
2006-9756-TZA	No	nat-cli-dro-dro	Natural	Climatological	Drought	Drought			TZA	United Republic of Tanzania	Sub-Saharan Africa	Africa	Arusha, Manyara, Kilimanjaro provinces		Food shortage	No	No	No			Km2				2006			2006					3700000		3700000							66.1603	[{"adm1_code":48357,"adm1_name":"Arusha"},{"adm1_code":48363,"adm1_name":"Kilimanjaro"},{"adm1_code":48365,"adm1_name":"Manyara"}]	2010-02-17	2023-09-25
2007-9288-SWZ	No	nat-cli-dro-dro	Natural	Climatological	Drought	Drought			SWZ	Eswatini	Sub-Saharan Africa	Africa	Hhohho, Lubombo, Manzini, Shiselweni provinces		Famine	No	No	Yes	15251		Km2				2007	7		2007					410000		410000							68.0477	[{"adm1_code":2782,"adm1_name":"Hhohho"},{"adm1_code":2783,"adm1_name":"Lubombo"},{"adm1_code":2784,"adm1_name":"Manzini"},{"adm1_code":2785,"adm1_name":"Shiselweni"}]	2008-07-31	2023-09-25
2007-9343-MOZ	No	nat-cli-dro-dro	Natural	Climatological	Drought	Drought			MOZ	Mozambique	Sub-Saharan Africa	Africa	Gaza, Inhambane, Manica, Sofala, Maputo provinces (Centre and south of the country)	Drought, cyclone et inondations	Food shortage	No	No	No			Km2				2007	8		2007	8				520000		520000							68.0477	[{"adm1_code":2113,"adm1_name":"Gaza"},{"adm1_code":2114,"adm1_name":"Inhambane"},{"adm1_code":2115,"adm1_name":"Manica"},{"adm1_code":2120,"adm1_name":"Sofala"},{"adm1_code":41373,"adm1_name":"Maputo"}]	2007-08-09	2023-09-25
2007-9347-PHL	No	nat-cli-dro-dro	Natural	Climatological	Drought	Drought			PHL	Philippines	South-eastern Asia	Asia	La Union, Pangasinan, Ilocos Sur districts (Region I (Ilocos region) province), Isabela, Nueva Vizcaya, Quirino districts (Region II (Cagayan Valley) province)			No	No	No			Km2				2007	8		2007	8													68.0477	[{"adm2_code":24212,"adm2_name":"Ilocos Sur"},{"adm2_code":24213,"adm2_name":"La Union"},{"adm2_code":24214,"adm2_name":"Pangasinan"},{"adm2_code":24217,"adm2_name":"Isabela"},{"adm2_code":24218,"adm2_name":"Nueva Vizcaya"},{"adm2_code":24219,"adm2_name":"Quirino"}]	2007-08-10	2023-09-25
2007-9494-LSO	No	nat-cli-dro-dro	Natural	Climatological	Drought	Drought			LSO	Lesotho	Sub-Saharan Africa	Africa	Maseru, Mafeteng, Leribe, Butha Buthe, Berea, Mohale's Hoek, Quthing provinces (Lowlands region)		Food shortage	Yes	Yes	No			Km2				2007	7		2008					475000		475000							68.0477	[{"adm1_code":1803,"adm1_name":"Berea"},{"adm1_code":1804,"adm1_name":"Butha Buthe"},{"adm1_code":1805,"adm1_name":"Leribe"},{"adm1_code":1806,"adm1_name":"Mafeteng"},{"adm1_code":1807,"adm1_name":"Maseru"},{"adm1_code":1808,"adm1_name":"Mohale's Hoek"},{"adm1_code":1811,"adm1_name":"Quthing"}]	2009-05-26	2023-09-25
2007-9499-MWI	No	nat-cli-dro-dro	Natural	Climatological	Drought	Drought			MWI	Malawi	Sub-Saharan Africa	Africa	Karonga, Mzimba districts (Northern Region province), Ntchisi district (Central Region province), Mulanje district (Southern Region province)			No	No	No			Km2				2007	10		2007					520000		520000							68.0477	[{"adm2_code":19314,"adm2_name":"Ntchisi"},{"adm2_code":19317,"adm2_name":"Karonga"},{"adm2_code":19318,"adm2_name":"Mzimba"},{"adm2_code":42176,"adm2_name":"Mulanje"}]	2007-10-16	2023-09-25
2007-9514-BRA	No	nat-cli-dro-dro	Natural	Climatological	Drought	Drought			BRA	Brazil	Latin America and the Caribbean	Americas	Ceara, Piaui, Maranhao, Tocantins, Minas Gerais provinces	Lack of rain from last six months		No	No	Yes			Km2				2007	10		2007					1000000		1000000							68.0477	[{"adm1_code":670,"adm1_name":"Ceara"},{"adm1_code":674,"adm1_name":"Maranhao"},{"adm1_code":677,"adm1_name":"Minas Gerais"},{"adm1_code":682,"adm1_name":"Piaui"},{"adm1_code":691,"adm1_name":"Tocantins"}]	2007-10-19	2023-09-25
2007-9548-USA	No	nat-cli-dro-dro	Natural	Climatological	Drought	Drought			USA	United States of America	Northern America	Americas	California, Georgia, Maryland provinces	Lack of precipitation		No	No	Yes			Km2				2007	10		2009	6											300000	440867	68.0477	[{"adm1_code":3218,"adm1_name":"California"},{"adm1_code":3224,"adm1_name":"Georgia"},{"adm1_code":3234,"adm1_name":"Maryland"}]	2009-07-16	2023-09-25
2007-9650-TLS	No	nat-cli-dro-dro	Natural	Climatological	Drought	Drought			TLS	Timor-Leste	South-eastern Asia	Asia	Aileu, Ainaro, Baucau, Ermera, Liquica, Manatuto, Manufahi provinces			No	No	No			Km2				2007	2		2007	3													68.0477	[{"adm1_code":2957,"adm1_name":"Aileu"},{"adm1_code":2958,"adm1_name":"Ainaro"},{"adm1_code":2959,"adm1_name":"Baucau"},{"adm1_code":2963,"adm1_name":"Ermera"},{"adm1_code":2965,"adm1_name":"Liquica"},{"adm1_code":2966,"adm1_name":"Manatuto"},{"adm1_code":2967,"adm1_name":"Manufahi"}]	2008-01-03	2023-09-25
2007-9675-ZWE	No	nat-cli-dro-dro	Natural	Climatological	Drought	Drought	GLIDE:JT-2008-000097		ZWE	Zimbabwe	Sub-Saharan Africa	Africa	Masvingo, Matabeleland North, Matabeleland South, Midlands, Manicaland, Mashonaland Central, Mashonaland East, Mashonaland West provinces		Food shortage	No	No	No			Km2				2007	1		2009	6				2100000		2100000							68.0477	[{"adm1_code":3437,"adm1_name":"Manicaland"},{"adm1_code":3438,"adm1_name":"Mashonaland Central"},{"adm1_code":3440,"adm1_name":"Mashonaland West"},{"adm1_code":3441,"adm1_name":"Masvingo"},{"adm1_code":3443,"adm1_name":"Matabeleland South"},{"adm1_code":3444,"adm1_name":"Midlands"},{"adm1_code":69549,"adm1_name":"Matabeleland North"},{"adm1_code":69550,"adm1_name":"Mashonaland East"}]	2009-07-20	2023-09-25
2007-9676-DJI	No	nat-cli-dro-dro	Natural	Climatological	Drought	Drought			DJI	Djibouti	Sub-Saharan Africa	Africa	NO DATA: all country selected			No	No	No			Km2				2007	1		2007	1				42750		42750							68.0477	[{"adm1_code":1093,"adm1_name":"Ali Sabieh"},{"adm1_code":1094,"adm1_name":"Dikhil"},{"adm1_code":1095,"adm1_name":"Djibouti"},{"adm1_code":1096,"adm1_name":"Obock"},{"adm1_code":1097,"adm1_name":"Tadjourah"}]	2008-01-14	2023-09-25
2007-9677-MDA	No	nat-cli-dro-dro	Natural	Climatological	Drought	Drought	GLIDE:DR-2007-000175		MDA	Republic of Moldova	Eastern Europe	Europe	Dubasari province (Transnitria region)	High temperature and low rainfall	Food shortage	Yes	No	No			Km2				2007			2007					210394		210394					406000	596641	68.0477	[{"adm1_code":2066,"adm1_name":"Dubasari"}]	2009-05-27	2023-09-25
2008-9154-THA	No	nat-cli-dro-dro	Natural	Climatological	Drought	Drought			THA	Thailand	South-eastern Asia	Asia	Ang Thong, Chainat, Chaiyaphum, Chiang Rai, Kalasin, Kampaeng Phet, Khon Kaen, Lampang, Loei, Lopburi, Maha Sarakham, Mukdahan, Nakhon Phanom, Nakhon Ratchasima, Nakhon Sawan, Nan, Nong Bua Lamphu, Nong Khai, Phayao, Phichit, Phitsanulok, Phra Nakhon Si Ayudhya, Phrae, Sakon Nakhon, Saraburi, Singburi, Sukhothai, Suphanburi, Udon Thani, Uthai Thani, Uttaradit provinces			No	No	No			Km2				2008	4		2008					10000000		10000000							70.6601	[{"adm1_code":2852,"adm1_name":"Ang Thong"},{"adm1_code":2856,"adm1_name":"Chainat"},{"adm1_code":2857,"adm1_name":"Chaiyaphum"},{"adm1_code":2860,"adm1_name":"Chiang Rai"},{"adm1_code":2863,"adm1_name":"Kalasin"},{"adm1_code":2864,"adm1_name":"Kampaeng Phet"},{"adm1_code":2866,"adm1_name":"Khon Kaen"},{"adm1_code":2868,"adm1_name":"Lampang"},{"adm1_code":2870,"adm1_name":"Loei"},{"adm1_code":287…	2008-06-26	2023-09-25
2008-9200-ERI	No	nat-cli-dro-dro	Natural	Climatological	Drought	Drought	GLIDE:DR-2008-000043		ERI	Eritrea	Sub-Saharan Africa	Africa	Achipelagos, Semenawi Keih Bahri provinces (Northern Red Sea Region), Debubawi Keih Bahri province (Southern Red Sea Region), Anseba, Debub provinces			No	No	No			Km2				2008	10		2008	10				1700000		1700000							70.6601	[{"adm1_code":1205,"adm1_name":"Anseba"},{"adm1_code":1206,"adm1_name":"Archipelagos"},{"adm1_code":1207,"adm1_name":"Debub"},{"adm1_code":1208,"adm1_name":"Debubawi Keih Bahri"},{"adm1_code":1211,"adm1_name":"Semenawi Keih Bahri"}]	2008-10-22	2023-09-25
2008-9200-ETH	No	nat-cli-dro-dro	Natural	Climatological	Drought	Drought	GLIDE:DR-2008-000043		ETH	Ethiopia	Sub-Saharan Africa	Africa	Oromia, Somali, Amhara, Afar, Tigray, SNNPR provinces	Heavy drought, weak reany season, loss of animals, food shortages and increase of prices	Famine|Food shortage	No	No	No			Km2				2008	5		2009	10				6400000		6400000							70.6601	[{"adm1_code":1228,"adm1_name":"Afar"},{"adm1_code":1229,"adm1_name":"Amhara"},{"adm1_code":1236,"adm1_name":"SNNPR"},{"adm1_code":1237,"adm1_name":"Tigray"},{"adm1_code":47678,"adm1_name":"Oromia"},{"adm1_code":47679,"adm1_name":"Somali"}]	2009-10-15	2023-09-25
2008-9302-KEN	No	nat-cli-dro-dro	Natural	Climatological	Drought	Drought	GLIDE:OT-2008-000098		KEN	Kenya	Sub-Saharan Africa	Africa	Sacho, Marigat, Mukutani, Tenges, Kolowa, Tangulbei, Nginyang cities/towns (Baringo district, Rift Valley province), Samburu district (Rift valley province), Turkana, West Pokot, Administrative Unit Not Available districts (North Rift Valley province), Central, Eastern, North Eastern, Coast provinces	Poor November rain		Yes	No	No			Km2				2008	7		2009			4		3800000		3800000							70.6601	[{"adm1_code":51325,"adm1_name":"Central"},{"adm1_code":51326,"adm1_name":"Coast"},{"adm1_code":51327,"adm1_name":"Eastern"},{"adm1_code":51329,"adm1_name":"North Eastern"},{"adm2_code":51377,"adm2_name":"Baringo"},{"adm2_code":51389,"adm2_name":"Samburu"},{"adm2_code":51392,"adm2_name":"Turkana"},{"adm2_code":51394,"adm2_name":"West Pokot"},{"adm2_code":61001,"adm2_name":"Administrative unit not…	2011-11-30	2023-09-25
2008-9303-DJI	No	nat-cli-dro-dro	Natural	Climatological	Drought	Drought	GLIDE:OT-2008-000043		DJI	Djibouti	Sub-Saharan Africa	Africa	Djibouti, Arta cities (Djibouti district, Djibouti province), Ali Sabieh district (Ali Sabieh province), Obock district (Obock province), Tadjourah district (Tadjourah province), Dikhil district (Dikhil province)	Delayed and below-normal rains	Food shortage	Yes	No	No			Km2				2008	7		2009					340000		340000							70.6601	[{"adm2_code":15272,"adm2_name":"Ali Sabieh"},{"adm2_code":15274,"adm2_name":"Dikhil"},{"adm2_code":15276,"adm2_name":"Djibouti"},{"adm2_code":15278,"adm2_name":"Obock"},{"adm2_code":15282,"adm2_name":"Tadjourah"}]	2009-05-26	2023-09-25
2008-9307-UGA	No	nat-cli-dro-dro	Natural	Climatological	Drought	Drought	GLIDE:OT-2008-000164		UGA	Uganda	Sub-Saharan Africa	Africa	Nakapiripit, Kodito, Abim provinces (Karamoja region, North-East)	Lack of rains	Food shortage	Yes	No	No			Km2				2008	7		2009	10				1100000		1100000							70.6601	[{"adm1_code":743,"adm1_name":"Abim"},{"adm1_code":765,"adm1_name":"Kotido"},{"adm1_code":773,"adm1_name":"Nakapiripirit"}]	2010-08-16	2023-09-25
2008-9456-TJK	No	nat-cli-dro-dro	Natural	Climatological	Drought	Drought			TJK	Tajikistan	Central Asia	Asia	Badakhshoni Kuni, Khatlon, Sogd, Tadzhikistan Territories provinces	Severe winter storm, locust infestation, increase in food and fuel cost	Food shortage	No	No	No			Km2				2008	10		2008	10				800000		800000							70.6601	[{"adm1_code":2847,"adm1_name":"Badakhshoni Kuni"},{"adm1_code":2848,"adm1_name":"Khatlon"},{"adm1_code":2849,"adm1_name":"Sogd"},{"adm1_code":2850,"adm1_name":"Tadzhikistan Territories"}]	2008-10-07	2023-09-25
2008-9468-SOM	No	nat-cli-dro-dro	Natural	Climatological	Drought	Drought			SOM	Somalia	Sub-Saharan Africa	Africa	Matabaan city, Belet Weyne district (Hiraan province)		Food shortage	No	No	No			Km2				2008	1		2009	4				3300000		3300000							70.6601	[{"adm2_code":25684,"adm2_name":"Belet Weyne"}]	2009-05-06	2023-09-25
2008-9475-AFG	No	nat-cli-dro-dro	Natural	Climatological	Drought	Drought			AFG	Afghanistan	Southern Asia	Asia	Kunduz, Balkh, Faryab, Badghis provinces		Food shortage	No	No	No			Km2				2008	10		2008	10				280000		280000							70.6601	[{"adm1_code":273,"adm1_name":"Badghis"},{"adm1_code":275,"adm1_name":"Balkh"},{"adm1_code":278,"adm1_name":"Faryab"},{"adm1_code":289,"adm1_name":"Kunduz"}]	2009-01-07	2023-09-25
2008-9550-PRY	No	nat-cli-dro-dro	Natural	Climatological	Drought	Drought	GLIDE:DR-2008-000157		PRY	Paraguay	Latin America and the Caribbean	Americas	Filadelfia, Loma Plata, Mariscal Estigarribia towns (Mcal. Estigarribia district, Boqueron province), Alto Paraguay, Presidente Hayes provinces	Prolonged dry spelle and hig temperatures		Yes	No	Yes			Km2				2008	9		2008			4		18000		18000							70.6601	[{"adm1_code":2311,"adm1_name":"Alto Paraguay"},{"adm1_code":2326,"adm1_name":"Presidente Hayes"},{"adm2_code":23810,"adm2_name":"Mcal. Estigarribia"}]	2009-05-29	2023-09-25
2008-9590-MOZ	No	nat-cli-dro-dro	Natural	Climatological	Drought	Drought			MOZ	Mozambique	Sub-Saharan Africa	Africa	Maputo, Gaza, Inhambane, Manica, Sofala, Tete provinces	Lack of rains and increase of food prices	Food shortage	Yes	No	No			Km2				2008	12		2009					500000		500000							70.6601	[{"adm1_code":2113,"adm1_name":"Gaza"},{"adm1_code":2114,"adm1_name":"Inhambane"},{"adm1_code":2115,"adm1_name":"Manica"},{"adm1_code":2120,"adm1_name":"Sofala"},{"adm1_code":2121,"adm1_name":"Tete"},{"adm1_code":41373,"adm1_name":"Maputo"}]	2010-08-16	2023-09-25
2008-9640-BDI	No	nat-cli-dro-dro	Natural	Climatological	Drought	Drought			BDI	Burundi	Sub-Saharan Africa	Africa	Kirundo, Ngozi, Muyinga, Cankuzo, Karuzi, Ruyigi provinces		Food shortage	No	No	No			Km2				2008	9		2009	1				82500		82500							70.6601	[{"adm1_code":40546,"adm1_name":"Cankuzo"},{"adm1_code":40549,"adm1_name":"Karuzi"},{"adm1_code":40551,"adm1_name":"Kirundo"},{"adm1_code":40554,"adm1_name":"Muyinga"},{"adm1_code":40556,"adm1_name":"Ngozi"},{"adm1_code":40558,"adm1_name":"Ruyigi"}]	2009-06-09	2023-09-25
2008-9644-MDG	No	nat-cli-dro-dro	Natural	Climatological	Drought	Drought			MDG	Madagascar	Sub-Saharan Africa	Africa	Atsimo Andrefana, Androy, Anosy provinces		Food shortage	No	No	No			Km2				2008			2011					720000		720000							70.6601	[{"adm1_code":41754,"adm1_name":"Androy"},{"adm1_code":41755,"adm1_name":"Anosy"},{"adm1_code":41756,"adm1_name":"Atsimo Andrefana"}]	2011-04-04	2023-09-25
2008-9661-BOL	No	nat-cli-dro-dro	Natural	Climatological	Drought	Drought			BOL	Bolivia (Plurinational State of)	Latin America and the Caribbean	Americas	La Paz, Oruro, Tarija, Chuquisaca, Santa Cruz provinces	El Nino, dry ecosystem, high temperatures and lon period withoit rainfall		No	No	Yes			Km2				2008	12		2009					27500		27500							70.6601	[{"adm1_code":40444,"adm1_name":"Chuquisaca"},{"adm1_code":40446,"adm1_name":"La Paz"},{"adm1_code":40447,"adm1_name":"Oruro"},{"adm1_code":40449,"adm1_name":"Santa Cruz"},{"adm1_code":40450,"adm1_name":"Tarija"}]	2010-01-19	2023-09-25
2008-9662-CHN	No	nat-cli-dro-dro	Natural	Climatological	Drought	Drought			CHN	China	Eastern Asia	Asia	Henan Sheng, Anhui Sheng, Shanxi Sheng, Shaanxi Sheng, Shandong Sheng, Hubei Sheng, Gansu Sheng, Hebei Sheng, Jiangsu Sheng provinces			No	No	Yes			Km2				2008	11		2009	2				3700000		3700000					234000	331163	70.6601	[{"adm1_code":898,"adm1_name":"Anhui Sheng"},{"adm1_code":902,"adm1_name":"Gansu Sheng"},{"adm1_code":907,"adm1_name":"Hebei Sheng"},{"adm1_code":909,"adm1_name":"Henan Sheng"},{"adm1_code":911,"adm1_name":"Hubei Sheng"},{"adm1_code":913,"adm1_name":"Jiangsu Sheng"},{"adm1_code":920,"adm1_name":"Shaanxi Sheng"},{"adm1_code":921,"adm1_name":"Shandong Sheng"},{"adm1_code":923,"adm1_name":"Shanxi Sh…	2010-03-07	2023-09-25
2008-9755-SYR	No	nat-cli-dro-dro	Natural	Climatological	Drought	Drought	GLIDE:DR-2009-000149		SYR	Syrian Arab Republic	Western Asia	Asia	Damascus, Homs, Hama, Raqqah, Dayr_Az_Zor, Hassakeh provinces			No	No	No	17240		Km2				2008			2010					1300000		1300000							70.6601	[{"adm1_code":2837,"adm1_name":"Damascus"},{"adm1_code":2839,"adm1_name":"Dayr_Az_Zor"},{"adm1_code":2840,"adm1_name":"Hama"},{"adm1_code":2841,"adm1_name":"Hassakeh"},{"adm1_code":2842,"adm1_name":"Homs"},{"adm1_code":2845,"adm1_name":"Raqqa"}]	2010-12-13	2023-09-25
2009-9055-ARG	No	nat-cli-dro-dro	Natural	Climatological	Drought	Drought			ARG	Argentina	Latin America and the Caribbean	Americas	Río Negro, La Pampa, Córdoba, Buenos Aires, Entre Ríos, Santa Fe, Corrientes, Chaco, Formosa, Santiago del Estero provinces	Lack of rain	Wildfire	No	No	Yes			Km2				2009	1		2009														70.4089	[{"adm1_code":429,"adm1_name":"Buenos Aires"},{"adm1_code":432,"adm1_name":"Chaco"},{"adm1_code":434,"adm1_name":"Cordoba"},{"adm1_code":435,"adm1_name":"Corrientes"},{"adm1_code":436,"adm1_name":"Entre Rios"},{"adm1_code":437,"adm1_name":"Formosa"},{"adm1_code":439,"adm1_name":"La Pampa"},{"adm1_code":444,"adm1_name":"Rio Negro"},{"adm1_code":449,"adm1_name":"Santa Fe"},{"adm1_code":450,"adm1_na…	2010-01-10	2023-09-25
2009-9210-PRY	No	nat-cli-dro-dro	Natural	Climatological	Drought	Drought	GLIDE:DR-2009-000104		PRY	Paraguay	Latin America and the Caribbean	Americas	Boqueron, Presidente Hayes, Alto Paraguay, Concepción, Neembucú provinces	La Nina and El Nino, deforestation		No	No	Yes			Km2				2009	1		2009	11				200000		200000							70.4089	[{"adm1_code":2311,"adm1_name":"Alto Paraguay"},{"adm1_code":2314,"adm1_name":"Boqueron"},{"adm1_code":2319,"adm1_name":"Concepcion"},{"adm1_code":2324,"adm1_name":"Neembucu"},{"adm1_code":2326,"adm1_name":"Presidente Hayes"}]	2009-12-12	2023-09-25
2009-9283-CHN	No	nat-cli-dro-dro	Natural	Climatological	Drought	Drought			CHN	China	Eastern Asia	Asia	Chaiyang, Fuxin, Jinzhou, Huludao districts (Liaoning Sheng province)			No	No	No			Km2				2009	6		2009	7				160000		160000							70.4089	[{"adm2_code":13183,"adm2_name":"Jinzhou"},{"adm2_code":13185,"adm2_name":"Fuxin"},{"adm2_code":13189,"adm2_name":"Chaoyang"},{"adm2_code":13190,"adm2_name":"Huludao"}]	2009-12-03	2023-09-25
2009-9323-BGD	No	nat-cli-dro-dro	Natural	Climatological	Drought	Drought			BGD	Bangladesh	Southern Asia	Asia	Barisal, Chittagong, Dhaka, Khulna, Rajshahi, Rangpur, Sylhet provinces			No	No	No			Km2				2009	7		2009	8													70.4089	[{"adm1_code":575,"adm1_name":"Barisal"},{"adm1_code":576,"adm1_name":"Chittagong"},{"adm1_code":577,"adm1_name":"Dhaka"},{"adm1_code":578,"adm1_name":"Khulna"},{"adm1_code":580,"adm1_name":"Sylhet"},{"adm1_code":61362,"adm1_name":"Rajshahi"},{"adm1_code":61363,"adm1_name":"Rangpur"}]	2009-12-08	2023-09-25
2009-9323-IND	No	nat-cli-dro-dro	Natural	Climatological	Drought	Drought			IND	India	Southern Asia	Asia	Bongaigaon, Cachar, Dhuburi, Goalpara, Golaghat, Hailakandi, Jorhat, Kamrup, Karbi Anglong, Kokrajhar, Lakhimpur, Marigaon, Nagaon, Sibsagar, Barpeta, Darrang, Dhemaji, Dibrugarh, Karimganj, Nalbari, North Cachar Hills, Sonitpur, Tinsukia districts (Assam province), Bilaspur, Chamba, Hamirpur, Kangra, Kinnaur, Kullu, Lahaul and Spiti, Mandi, Shimla, Sirmaur, Solan, Una districts (Himachal Pradesh…			No	No	Yes			Km2				2009	7		2009	8													70.4089	[{"adm2_code":17576,"adm2_name":"Barpeta"},{"adm2_code":17577,"adm2_name":"Cachar"},{"adm2_code":17578,"adm2_name":"Darrang"},{"adm2_code":17579,"adm2_name":"Dhuburi"},{"adm2_code":17580,"adm2_name":"Dibrugarh"},{"adm2_code":17581,"adm2_name":"Goalpara"},{"adm2_code":17582,"adm2_name":"Golaghat"},{"adm2_code":17583,"adm2_name":"Kamrup"},{"adm2_code":17584,"adm2_name":"Karbi Anglong"},{"adm2_code"…	2009-12-08	2023-09-25
2009-9415-ECU	No	nat-cli-dro-dro	Natural	Climatological	Drought	Drought	GLIDE:OT-2009-000169		ECU	Ecuador	Latin America and the Caribbean	Americas	Manabi, Los Rios, Cotopaxi, Bolivar, Chimborazo, Tungurahua provinces	Poor rainy season, El NIno		No	No	Yes			Km2				2009	11		2010					107500		107500					1700	2414	70.4089	[{"adm1_code":1136,"adm1_name":"Bolivar"},{"adm1_code":1139,"adm1_name":"Chimborazo"},{"adm1_code":1140,"adm1_name":"Cotopaxi"},{"adm1_code":1147,"adm1_name":"Los Rios"},{"adm1_code":1148,"adm1_name":"Manabi"},{"adm1_code":1155,"adm1_name":"Tungurahua"}]	2010-04-26	2023-09-25
2009-9415-GTM	No	nat-cli-dro-dro	Natural	Climatological	Drought	Drought	GLIDE:OT-2009-000169		GTM	Guatemala	Latin America and the Caribbean	Americas	Baja Verapaz, El Progreso, Zacapa, Jalapa, Chiquimula, Santa Rosa, Jutiapa, Quiché provinces	El Nino	Food shortage	No	No	Yes	777		Km2				2009	3		2009	12				2500000		2500000							70.4089	[{"adm1_code":64822,"adm1_name":"El Progreso"},{"adm1_code":64826,"adm1_name":"Santa Rosa"},{"adm1_code":64834,"adm1_name":"Quiché"},{"adm1_code":64835,"adm1_name":"Baja Verapaz"},{"adm1_code":64839,"adm1_name":"Zacapa"},{"adm1_code":64840,"adm1_name":"Chiquimula"},{"adm1_code":64841,"adm1_name":"Jalapa"},{"adm1_code":64842,"adm1_name":"Jutiapa"}]	2010-02-09	2023-09-25
2009-9415-SLV	No	nat-cli-dro-dro	Natural	Climatological	Drought	Drought	GLIDE:OT-2009-000169		SLV	El Salvador	Latin America and the Caribbean	Americas	Ahuachapan, Cabanas, Chalatenango, Cuscatlan, La Libertad, La Paz, La Union, Morazan, San Miguel, San Salvador, San Vicente, Santa Ana, Sonsonate, Usulutan provinces	Lack of rain		No	No	No			Km2				2009		12	2009												27000	38347	70.4089	[{"adm1_code":1184,"adm1_name":"Ahuachapan"},{"adm1_code":1185,"adm1_name":"Cabanas"},{"adm1_code":1186,"adm1_name":"Chalatenango"},{"adm1_code":1187,"adm1_name":"Cuscatlan"},{"adm1_code":1188,"adm1_name":"La Libertad"},{"adm1_code":1189,"adm1_name":"La Paz"},{"adm1_code":1190,"adm1_name":"La Union"},{"adm1_code":1191,"adm1_name":"Morazan"},{"adm1_code":1192,"adm1_name":"San Miguel"},{"adm1_code"…	2010-04-26	2023-09-25
2009-9415-VEN	No	nat-cli-dro-dro	Natural	Climatological	Drought	Drought	GLIDE:OT-2009-000169		VEN	Venezuela (Bolivarian Republic of)	Latin America and the Caribbean	Americas	Amazonas, Anzoategui, Apure, Aragua, Barinas, Bolivar, Carabobo, Cojedes, Delta Amacuro, Dependencias Federales, Falcon, Guarico, Lara, Merida, Miranda, Monagas, Nueva Esparta, Portuguesa, Sucre, Tachira, Trujillo, Yaracuy, Zulia, Vargas, Distrito Capital provinces			No	No	Yes			Km2				2009	11		2010														70.4089	[{"adm1_code":3302,"adm1_name":"Amazonas"},{"adm1_code":3303,"adm1_name":"Anzoategui"},{"adm1_code":3304,"adm1_name":"Apure"},{"adm1_code":3305,"adm1_name":"Aragua"},{"adm1_code":3306,"adm1_name":"Barinas"},{"adm1_code":3307,"adm1_name":"Bolivar"},{"adm1_code":3308,"adm1_name":"Carabobo"},{"adm1_code":3309,"adm1_name":"Cojedes"},{"adm1_code":3310,"adm1_name":"Delta Amacuro"},{"adm1_code":3311,"ad…	2010-02-10	2023-09-25
2009-9559-HND	No	nat-cli-dro-dro	Natural	Climatological	Drought	Drought			HND	Honduras	Latin America and the Caribbean	Americas	Paraiso, Francisco Morazan, Yoro, Choluteca, Valle, Intibuca provinces	La Nina	Food shortage	No	No	Yes			Km2				2009	11		2011	2				45000		45000							70.4089	[{"adm1_code":1421,"adm1_name":"Choluteca"},{"adm1_code":1426,"adm1_name":"Francisco Morazan"},{"adm1_code":1428,"adm1_name":"Intibuca"},{"adm1_code":1435,"adm1_name":"Paraiso"},{"adm1_code":1437,"adm1_name":"Valle"},{"adm1_code":1438,"adm1_name":"Yoro"}]	2011-04-20	2023-09-25
2009-9615-ETH	No	nat-cli-dro-dro	Natural	Climatological	Drought	Drought	GLIDE:OT-2010-000016		ETH	Ethiopia	Sub-Saharan Africa	Africa	Somali, Oromia, Afar, Tigray, Amhara, SNNP, Gambela provinces	Poor rainfall	Food shortage	No	No	No			Km2				2009	1		2010	8				6200000		6200000							70.4089	[{"adm1_code":1228,"adm1_name":"Afar"},{"adm1_code":1229,"adm1_name":"Amhara"},{"adm1_code":1232,"adm1_name":"Gambela"},{"adm1_code":1236,"adm1_name":"SNNPR"},{"adm1_code":1237,"adm1_name":"Tigray"},{"adm1_code":47678,"adm1_name":"Oromia"},{"adm1_code":47679,"adm1_name":"Somali"}]	2010-08-26	2023-09-25
2009-9633-SSD	No	nat-cli-dro-dro	Natural	Climatological	Drought	Drought			SSD	South Sudan	Sub-Saharan Africa	Africa	Unity, Northern Bahr Ghazal, Jonglei, Upper Nile, Eastern Equatoria, Warab provinces	Bad distibution of rain, conflict and bad recolt	Food shortage	No	No	No			Km2				2009			2010					4300000		4300000							70.4089	[{"adm1_code":2747,"adm1_name":"Unity"},{"adm1_code":2750,"adm1_name":"Eastern Equatoria"},{"adm1_code":2751,"adm1_name":"Jonglei"},{"adm1_code":2754,"adm1_name":"Northern Bahr El Ghazal"},{"adm1_code":2765,"adm1_name":"Warab"},{"adm1_code":37021,"adm1_name":"Upper Nile"}]	2010-02-04	2023-09-25
2009-9634-BDI	No	nat-cli-dro-dro	Natural	Climatological	Drought	Drought			BDI	Burundi	Sub-Saharan Africa	Africa	Kirundo, Bugabira, Busoni districts (Kirundo province)	Failed rains	Food shortage	No	No	No			Km2				2009	12		2010	2				180000		180000							70.4089	[{"adm2_code":40638,"adm2_name":"Bugabira"},{"adm2_code":40639,"adm2_name":"Busoni"},{"adm2_code":40642,"adm2_name":"Kirundo"}]	2010-02-24	2023-09-25
2009-9651-NER	No	nat-cli-dro-dro	Natural	Climatological	Drought	Drought	GLIDE:OT-2010-000028		NER	Niger	Sub-Saharan Africa	Africa	Agadez, Diffa, Dosso, Maradi, Tahoua, Tillaberi, Zinder, Niamey provinces	Irregular rain	Food shortage	Yes	No	No			Km2				2009	9		2010	3				7900000		7900000							70.4089	[{"adm1_code":2202,"adm1_name":"Agadez"},{"adm1_code":2203,"adm1_name":"Diffa"},{"adm1_code":2204,"adm1_name":"Dosso"},{"adm1_code":2205,"adm1_name":"Maradi"},{"adm1_code":2206,"adm1_name":"Niamey"},{"adm1_code":2207,"adm1_name":"Tahoua"},{"adm1_code":2208,"adm1_name":"Tillaberi"},{"adm1_code":2209,"adm1_name":"Zinder"}]	2014-07-28	2023-09-25
2009-9654-TCD	No	nat-cli-dro-dro	Natural	Climatological	Drought	Drought	GLIDE:OT-2010-000056		TCD	Chad	Sub-Saharan Africa	Africa	Kanem, Barl El Gazal, Lac, Batha Est, Batha Ouest, Guera, Sila, Salamat, Ouaddai, Hadjer Lamis provinces	Poor, irregular, dispersed and eraly cessation of rainfall	Food shortage	Yes	No	No			Km2				2009	12		2010	7				2400000		2400000							70.4089	[{"adm1_code":873,"adm1_name":"Guera"},{"adm1_code":875,"adm1_name":"Lac"},{"adm1_code":881,"adm1_name":"Salamat"},{"adm1_code":12904,"adm1_name":"Batha Est"},{"adm1_code":12905,"adm1_name":"Batha Ouest"},{"adm1_code":12912,"adm1_name":"Hadjer Lamis"},{"adm1_code":12914,"adm1_name":"Barl El Gazal"},{"adm1_code":12915,"adm1_name":"Kanem"},{"adm1_code":12927,"adm1_name":"Ouaddai"},{"adm1_code":1292…	2014-07-28	2023-09-25
2009-9655-CHN	No	nat-cli-dro-dro	Natural	Climatological	Drought	Drought			CHN	China	Eastern Asia	Asia	Yunnan Sheng, Guizhou Sheng, Sichuan Sheng, Guangxi Zhuangzu Zizhiqu, Chongqing Shi provinces	Low precipitations	Water shortage	No	No	No			Km2				2009	10		2010	5				60000000		60000000					3600000	5112993	70.4089	[{"adm1_code":900,"adm1_name":"Chongqing Shi"},{"adm1_code":904,"adm1_name":"Guangxi Zhuangzu Zizhiqu"},{"adm1_code":905,"adm1_name":"Guizhou Sheng"},{"adm1_code":924,"adm1_name":"Sichuan Sheng"},{"adm1_code":929,"adm1_name":"Yunnan Sheng"}]	2011-01-10	2023-09-25
2009-9660-NPL	No	nat-cli-dro-dro	Natural	Climatological	Drought	Drought			NPL	Nepal	Southern Asia	Asia	Far Western, Mid Western provinces		Food shortage	Yes	No	No			Km2				2009			2009					303000		303000							70.4089	[{"adm1_code":2154,"adm1_name":"Far Western"},{"adm1_code":2155,"adm1_name":"Mid Western"}]	2010-08-16	2023-09-25
2009-9661-KGZ	No	nat-cli-dro-dro	Natural	Climatological	Drought	Drought			KGZ	Kyrgyzstan	Central Asia	Asia	Batken, Bishkek, Jalal-Abad, Naryn, Osh, Talas, Ysyk-Kol provinces		Food shortage	Yes	No	No			Km2				2009			2009					2000000		2000000							70.4089	[{"adm1_code":1746,"adm1_name":"Batken"},{"adm1_code":1748,"adm1_name":"Jalal-Abad"},{"adm1_code":1749,"adm1_name":"Naryn"},{"adm1_code":1750,"adm1_name":"Osh"},{"adm1_code":1751,"adm1_name":"Talas"},{"adm1_code":1752,"adm1_name":"Ysyk-Kol"},{"adm1_code":147293,"adm1_name":"Bishkek"}]	2010-08-16	2023-09-25
2010-9077-BRB	No	nat-cli-dro-dro	Natural	Climatological	Drought	Drought	GLIDE:DR-2010-000029		BRB	Barbados	Latin America and the Caribbean	Americas	Christ Church, St. Andrew, St. George, St. James, St. John, St. Joseph, St. Lucy, St. Michael, St. Peter, St. Phillip, St. Tomas provinces	Extremely dry conditipns		No	No	No			Km2				2010	1		2010	6													71.5636	[{"adm2_code":5825,"adm2_name":"Administrative unit not available"},{"adm2_code":5826,"adm2_name":"Administrative unit not available"},{"adm2_code":5827,"adm2_name":"Administrative unit not available"},{"adm2_code":5828,"adm2_name":"Administrative unit not available"},{"adm2_code":5829,"adm2_name":"Administrative unit not available"},{"adm2_code":5830,"adm2_name":"Administrative unit not availabl…	2010-07-13	2023-09-25
2010-9077-GRD	No	nat-cli-dro-dro	Natural	Climatological	Drought	Drought	GLIDE:DR-2010-000029		GRD	Grenada	Latin America and the Caribbean	Americas	St. Patrick's, Name Unknown, St. George's provinces	Severe dry conditions	Wildfire	No	No	No			Km2				2010	1		2010	6													71.5636	[{"adm1_code":1352,"adm1_name":"Name Unknown"},{"adm1_code":1354,"adm1_name":"St. George's"},{"adm2_code":16735,"adm2_name":"Administrative unit not available"}]	2010-07-13	2023-09-25
2010-9077-GUY	No	nat-cli-dro-dro	Natural	Climatological	Drought	Drought	GLIDE:DR-2010-000029		GUY	Guyana	Latin America and the Caribbean	Americas	Barima Waini (region N°1), Cuyuni/mazaruni (region N°7), Pomeroon/supenaam (region N°2), Potaro/siparuni (region N°8), Upper Takutu/upper Essequibo (region N°9) provinces	El Nino		No	No	No			Km2				2010	1		2010	6											14700	20541	71.5636	[{"adm1_code":1398,"adm1_name":"Barima Waini (region N°1)"},{"adm1_code":1399,"adm1_name":"Cuyuni/mazaruni (region N°7)"},{"adm1_code":1404,"adm1_name":"Pomeroon/supenaam (region N°2"},{"adm1_code":1405,"adm1_name":"Potaro/siparuni (region N°8)"},{"adm1_code":1407,"adm1_name":"Upper Takutu/upper Essequibo (region N°9)"}]	2010-07-13	2023-09-25
2010-9077-LCA	No	nat-cli-dro-dro	Natural	Climatological	Drought	Drought	GLIDE:DR-2010-000029		LCA	Saint Lucia	Latin America and the Caribbean	Americas	Area Under National Administration, Region Number 1 - 8 provinces		Water shortage	No	No	No			Km2				2010	1		2010	6													71.5636	[{"adm1_code":2607,"adm1_name":"Area Under National Administra"},{"adm1_code":2608,"adm1_name":"Region Number 1"},{"adm1_code":2609,"adm1_name":"Region Number 2"},{"adm1_code":2610,"adm1_name":"Region Number 3"},{"adm1_code":2611,"adm1_name":"Region Number 4"},{"adm1_code":2612,"adm1_name":"Region Number 5"},{"adm1_code":2613,"adm1_name":"Region Number 6"},{"adm1_code":2614,"adm1_name":"Region Nu…	2010-07-13	2023-09-25
2010-9077-TTO	No	nat-cli-dro-dro	Natural	Climatological	Drought	Drought	GLIDE:DR-2010-000029		TTO	Trinidad and Tobago	Latin America and the Caribbean	Americas	Arima, Chaguanas, Couva/Tabaquite/Talparo, Diego Martin, Penal/Debe, Point Fortin, Port Of Spain, Princes Town, Rio Claro/Mayaro, San Fernando, San Juan/Laventille, Sangre Grande, Siparia, Tobago, Tunapuna/Piarco provinces		Water shortage	No	No	Yes			Km2				2010	1		2010	6													71.5636	[{"adm1_code":2977,"adm1_name":"Arima"},{"adm1_code":2978,"adm1_name":"Chaguanas"},{"adm1_code":2979,"adm1_name":"Couva/Tabaquite/Talparo"},{"adm1_code":2980,"adm1_name":"Diego Martin"},{"adm1_code":2981,"adm1_name":"Penal/Debe"},{"adm1_code":2982,"adm1_name":"Point Fortin"},{"adm1_code":2983,"adm1_name":"Port Of Spain"},{"adm1_code":2984,"adm1_name":"Princes Town"},{"adm1_code":2985,"adm1_name":…	2010-07-13	2023-09-25
2010-9077-VCT	No	nat-cli-dro-dro	Natural	Climatological	Drought	Drought	GLIDE:DR-2010-000029		VCT	Saint Vincent and the Grenadines	Latin America and the Caribbean	Americas	Carriacou, Petite Martinique islands (Grenadines province)			No	No	No			Km2				2010	1		2010	6													71.5636	[{"adm2_code":61291,"adm2_name":"Administrative unit not available"}]	2016-05-26	2023-09-25
2010-9082-BDI	No	nat-cli-dro-dro	Natural	Climatological	Drought	Drought	GLIDE:DR-2011-000029		BDI	Burundi	Sub-Saharan Africa	Africa	Kayanza, Ngozi provinces (North region), Cankuzo, Kirundo, Muyinga provinces (North-Eastern region), Bururi, Makamba, Rutana provinces (Southern region)	Rainfall deficit in October December 2010		No	No	No			Km2				2011			2011														73.8228	[{"adm1_code":40545,"adm1_name":"Bururi"},{"adm1_code":40546,"adm1_name":"Cankuzo"},{"adm1_code":40550,"adm1_name":"Kayanza"},{"adm1_code":40551,"adm1_name":"Kirundo"},{"adm1_code":40552,"adm1_name":"Makamba"},{"adm1_code":40554,"adm1_name":"Muyinga"},{"adm1_code":40556,"adm1_name":"Ngozi"},{"adm1_code":40557,"adm1_name":"Rutana"}]	2014-07-28	2023-09-25
2010-9082-DJI	No	nat-cli-dro-dro	Natural	Climatological	Drought	Drought	GLIDE:DR-2011-000029		DJI	Djibouti	Sub-Saharan Africa	Africa	Ali Sabieh district (Ali Sabieh province), Dikhil, Yoboki districts (Dikhil province), Alaili Dadda, Obock districts (Obock province), Balha, Dorra districts (Tadjourah province)			No	No	No			Km2				2010	11		2011	7				200258		200258							71.5636	[{"adm2_code":15272,"adm2_name":"Ali Sabieh"},{"adm2_code":15274,"adm2_name":"Dikhil"},{"adm2_code":15275,"adm2_name":"Yoboki"},{"adm2_code":15277,"adm2_name":"Alaili Dadda"},{"adm2_code":15278,"adm2_name":"Obock"},{"adm2_code":15279,"adm2_name":"Balha"},{"adm2_code":15280,"adm2_name":"Dorra"}]	2012-04-10	2023-09-25
2010-9082-ETH	No	nat-cli-dro-dro	Natural	Climatological	Drought	Drought	GLIDE:DR-2011-000029		ETH	Ethiopia	Sub-Saharan Africa	Africa	Somali, Oromia, Afar, Tigray, Amhara provinces	La Nina		Yes	No	No			Km2				2011	1		2012	1				4805679		4805679							73.8228	[{"adm1_code":1228,"adm1_name":"Afar"},{"adm1_code":1229,"adm1_name":"Amhara"},{"adm1_code":1237,"adm1_name":"Tigray"},{"adm1_code":47678,"adm1_name":"Oromia"},{"adm1_code":47679,"adm1_name":"Somali"}]	2014-07-28	2023-09-25
2010-9082-KEN	No	nat-cli-dro-dro	Natural	Climatological	Drought	Drought	GLIDE:DR-2011-000029		KEN	Kenya	Sub-Saharan Africa	Africa	Marsabit, Isiolo, Moyale districts (Eastern province); Mandera, Wajir, Ijara, Garissa (North Eastern province); West Pokot, Turkana, Samburu district (Rift Valley Province); Tana River, Lamu, Kwale (Coast province)	La Nina	Famine	Yes	No	No			Km2				2011	1		2011	1				4300000		4300000							73.8228	[{"adm2_code":51341,"adm2_name":"Kwale"},{"adm2_code":51342,"adm2_name":"Lamu"},{"adm2_code":51346,"adm2_name":"Tana River"},{"adm2_code":51348,"adm2_name":"Isiolo"},{"adm2_code":51352,"adm2_name":"Marsabit"},{"adm2_code":51357,"adm2_name":"Moyale"},{"adm2_code":51361,"adm2_name":"Garissa"},{"adm2_code":51362,"adm2_name":"Ijara"},{"adm2_code":51363,"adm2_name":"Mandera"},{"adm2_code":51364,"adm2_…	2014-07-28	2023-09-25
2010-9082-SOM	No	nat-cli-dro-dro	Natural	Climatological	Drought	Drought	GLIDE:DR-2011-000029		SOM	Somalia	Sub-Saharan Africa	Africa	Bakool, Shabelle Hoose, Shabelle Dhexe, Bay, Galgaduud, Gedo, Hiraan, Juba Dhexe, Juba Hoose, Mudug, Sanaag, Sool, Togdheer, Woqooyi Galbeed, Awdal, Bari, Nugaal province	Failure of Gu and Deyr rain y seasons in 2009	Famine	No	Yes	Yes			Km2				2010	2		2011	11		20000		4000000		4000000							71.5636	[{"adm1_code":2688,"adm1_name":"Awdal"},{"adm1_code":2689,"adm1_name":"Bakool"},{"adm1_code":2690,"adm1_name":"Bari"},{"adm1_code":2691,"adm1_name":"Bay"},{"adm1_code":2693,"adm1_name":"Galgaduud"},{"adm1_code":2694,"adm1_name":"Gedo"},{"adm1_code":2695,"adm1_name":"Hiraan"},{"adm1_code":2696,"adm1_name":"Juba Hoose"},{"adm1_code":2697,"adm1_name":"Shabelle Hoose"},{"adm1_code":2698,"adm1_name":"…	2014-07-22	2023-09-25
2010-9082-UGA	No	nat-cli-dro-dro	Natural	Climatological	Drought	Drought	GLIDE:DR-2011-000029		UGA	Uganda	Sub-Saharan Africa	Africa	Kaabong, Kotido, Abim, Moroto, Nakapiripirit provinces (Karamoja region)			No	No	No			Km2				2011	3		2011					669000		669000							73.8228	[{"adm1_code":743,"adm1_name":"Abim"},{"adm1_code":765,"adm1_name":"Kotido"},{"adm1_code":772,"adm1_name":"Moroto"},{"adm1_code":773,"adm1_name":"Nakapiripirit"},{"adm1_code":47074,"adm1_name":"Kaabong"}]	2011-06-14	2023-09-25
2010-9132-THA	No	nat-cli-dro-dro	Natural	Climatological	Drought	Drought			THA	Thailand	South-eastern Asia	Asia	Ang Thong, Chainat, Chaiyaphum, Chiang Rai, Kalasin, Kampaeng Phet, Khon Kaen, Lampang, Loei, Lopburi, Maha Sarakham, Mukdahan, Nakhon Phanom, Nakhon Ratchasima, Nakhon Sawan, Nan, Nong Bua Lamphu, Nong Khai, Phayao, Phichit, Phitsanulok, Phra Nakhon Si Ayudhya, Phrae, Sakon Nakhon, Saraburi, Singburi, Sukhothai, Suphanburi, Udon Thani, Uthai Thani, Uttaradit provinces			No	No	Yes			Km2				2010	3		2011	3				6482602		6482602							71.5636	[{"adm1_code":2852,"adm1_name":"Ang Thong"},{"adm1_code":2856,"adm1_name":"Chainat"},{"adm1_code":2857,"adm1_name":"Chaiyaphum"},{"adm1_code":2860,"adm1_name":"Chiang Rai"},{"adm1_code":2863,"adm1_name":"Kalasin"},{"adm1_code":2864,"adm1_name":"Kampaeng Phet"},{"adm1_code":2866,"adm1_name":"Khon Kaen"},{"adm1_code":2868,"adm1_name":"Lampang"},{"adm1_code":2870,"adm1_name":"Loei"},{"adm1_code":287…	2011-04-21	2023-09-25
2010-9181-ZWE	No	nat-cli-dro-dro	Natural	Climatological	Drought	Drought			ZWE	Zimbabwe	Sub-Saharan Africa	Africa	Manicaland, Mashonaland Central, Mashonaland East, Mashonaland West, Masvingo, Matabeleland North, Matabeleland South, Midlands provinces		Food shortage	No	No	No			Km2				2010	5		2013					1667618		1667618							71.5636	[{"adm1_code":3437,"adm1_name":"Manicaland"},{"adm1_code":3438,"adm1_name":"Mashonaland Central"},{"adm1_code":3440,"adm1_name":"Mashonaland West"},{"adm1_code":3441,"adm1_name":"Masvingo"},{"adm1_code":3443,"adm1_name":"Matabeleland South"},{"adm1_code":3444,"adm1_name":"Midlands"},{"adm1_code":69549,"adm1_name":"Matabeleland North"},{"adm1_code":69550,"adm1_name":"Mashonaland East"}]	2013-11-26	2023-09-25
2010-9249-MLI	No	nat-cli-dro-dro	Natural	Climatological	Drought	Drought			MLI	Mali	Sub-Saharan Africa	Africa	Kayes, Tombouctou, Kidal, Gao provinces			No	No	No			Km2				2010	6		2010					600000		600000							71.5636	[{"adm1_code":1927,"adm1_name":"Gao"},{"adm1_code":1928,"adm1_name":"Kayes"},{"adm1_code":1929,"adm1_name":"Kidal"},{"adm1_code":1934,"adm1_name":"Tombouctou"}]	2010-07-22	2023-09-25
2010-9253-BOL	No	nat-cli-dro-dro	Natural	Climatological	Drought	Drought			BOL	Bolivia (Plurinational State of)	Latin America and the Caribbean	Americas	Santa Cruz, Tarija, Chuquisaca provinces			No	No	Yes			Km2				2010	6		2010	9				62500		62500					100000	139736	71.5636	[{"adm1_code":40444,"adm1_name":"Chuquisaca"},{"adm1_code":40449,"adm1_name":"Santa Cruz"},{"adm1_code":40450,"adm1_name":"Tarija"}]	2010-09-22	2023-09-25
2010-9290-MOZ	No	nat-cli-dro-dro	Natural	Climatological	Drought	Drought			MOZ	Mozambique	Sub-Saharan Africa	Africa	Maputo, Inhambane, Gaza provinces (South)		Food shortage	No	No	No			Km2				2010	3		2010					460000		460000							71.5636	[{"adm1_code":2113,"adm1_name":"Gaza"},{"adm1_code":2114,"adm1_name":"Inhambane"},{"adm1_code":41373,"adm1_name":"Maputo"}]	2010-07-15	2023-09-25
2010-9292-MRT	No	nat-cli-dro-dro	Natural	Climatological	Drought	Drought			MRT	Mauritania	Sub-Saharan Africa	Africa	Assaba, Brakna, Gorgol, Guidimakha, Hodh Ech Gharbi, Nouakchott, Tagant, Trarza provinces; Amourj, Bassikounou, Djigueni, Nema, Timbedra districts (Hodh Ech Chargi province) (Southern Mauritania/Sahel region)	Seasonal rain above the average in 2010 and 2011	Food shortage	No	Yes	No			Km2				2010			2011					838000		838000							71.5636	[{"adm1_code":2005,"adm1_name":"Assaba"},{"adm1_code":2006,"adm1_name":"Brakna"},{"adm1_code":2008,"adm1_name":"Gorgol"},{"adm1_code":2009,"adm1_name":"Guidimakha"},{"adm1_code":2011,"adm1_name":"Hodh El Gharbi"},{"adm1_code":2013,"adm1_name":"Nouakchott"},{"adm1_code":2014,"adm1_name":"Tagant"},{"adm1_code":2016,"adm1_name":"Trarza"},{"adm2_code":19511,"adm2_name":"Amourj"},{"adm2_code":19512,"a…	2012-01-04	2023-09-25
2010-9318-RUS	No	nat-cli-dro-dro	Natural	Climatological	Drought	Drought			RUS	Russian Federation	Eastern Europe	Europe	Adygeya Rep., Astrakhanskaya Oblast, Bashkortostan Rep., Belgorodskaya Oblast, Bryanskaya Oblast, Chelyabinskaya Oblast, Ivanovskaya Oblast, Kalmykiya Rep., Kaluzhskaya Oblast, Krasnodarskiy Kray, Kurskaya Oblast, Lipetskaya Oblast, Moskovskaya Oblast, Moskva, Name Unknown, Orenburgskaya Oblast, Orlovskaya Oblast, Penzenskaya Oblast, Rostovskaya Oblast, Ryazanskaya Oblast, Samarskaya Oblast, Sara…		Heat wave|Wildfire	No	No	Yes			Km2				2010	4	1	2010	8	20										1400000	1956302	71.5636	[{"adm1_code":2487,"adm1_name":"Adygeya Rep."},{"adm1_code":2493,"adm1_name":"Astrakhanskaya Oblast"},{"adm1_code":2494,"adm1_name":"Bashkortostan Rep."},{"adm1_code":2495,"adm1_name":"Belgorodskaya Oblast"},{"adm1_code":2496,"adm1_name":"Bryanskaya Oblast"},{"adm1_code":2499,"adm1_name":"Chelyabinskaya Oblast"},{"adm1_code":2507,"adm1_name":"Ivanovskaya Oblast"},{"adm1_code":2510,"adm1_name":"Ka…	2010-08-23	2023-09-25
2010-9556-BRA	No	nat-cli-dro-dro	Natural	Climatological	Drought	Drought			BRA	Brazil	Latin America and the Caribbean	Americas	Amazonas province			No	No	Yes			Km2				2010	10		2010					62000		62000							71.5636	[{"adm1_code":668,"adm1_name":"Amazonas"}]	2010-11-05	2023-09-25
2010-9701-CHN	No	nat-cli-dro-dro	Natural	Climatological	Drought	Drought			CHN	China	Eastern Asia	Asia	Anhui Sheng, Gansu Sheng, Henan Sheng, Hebei Sheng, Jiangsu Sheng, Shaanxi Sheng, Shandong Sheng, Shanxi Sheng provinces		Water shortage	No	No	No			Km2				2010	12		2011	5				35000000		35000000					2370000	3311740	71.5636	[{"adm1_code":898,"adm1_name":"Anhui Sheng"},{"adm1_code":902,"adm1_name":"Gansu Sheng"},{"adm1_code":907,"adm1_name":"Hebei Sheng"},{"adm1_code":909,"adm1_name":"Henan Sheng"},{"adm1_code":913,"adm1_name":"Jiangsu Sheng"},{"adm1_code":920,"adm1_name":"Shaanxi Sheng"},{"adm1_code":921,"adm1_name":"Shandong Sheng"},{"adm1_code":923,"adm1_name":"Shanxi Sheng"}]	2012-04-05	2023-09-25
2011-9207-THA	No	nat-cli-dro-dro	Natural	Climatological	Drought	Drought			THA	Thailand	South-eastern Asia	Asia	Chians Rai, Nan, Phrae, Loei, Nong Khai, Ubon Ratchathani, Mukdahan, Sakon Nakhon, Si Saket, Surin, Chaiyaphum, Amnat Charoen, Kalasin, Nakhon Ratchasima, Buriram, Yasothon provinces (North); Sukhothai, Phetchabun, Phichit provinces (Central); Prachuap Khilikhan, Phetchaburi, Kanchanaburi provinces (West)			No	No	Yes			Km2				2011	6		2011														73.8228	[{"adm1_code":2851,"adm1_name":"Amnat Charoen"},{"adm1_code":2854,"adm1_name":"Buriram"},{"adm1_code":2857,"adm1_name":"Chaiyaphum"},{"adm1_code":2860,"adm1_name":"Chiang Rai"},{"adm1_code":2863,"adm1_name":"Kalasin"},{"adm1_code":2865,"adm1_name":"Kanchanaburi"},{"adm1_code":2870,"adm1_name":"Loei"},{"adm1_code":2874,"adm1_name":"Mukdahan"},{"adm1_code":2878,"adm1_name":"Nakhon Ratchasima"},{"ad…	2011-06-10	2023-09-25
2011-9312-AFG	No	nat-cli-dro-dro	Natural	Climatological	Drought	Drought			AFG	Afghanistan	Southern Asia	Asia	Balkh, Samangan, Takhar, Sar-e-Pul, Hirat, Badghis, Faryab, Jawzjan, Baghlan, Kunduz, Badakshan, Bamyan, Daykundi, Ghor provinces	Limited snowfall and rainfall	Food shortage	No	No	No			Km2				2011	1		2011	8				1750000		1750000					142000	192353	73.8228	[{"adm1_code":272,"adm1_name":"Badakhshan"},{"adm1_code":273,"adm1_name":"Badghis"},{"adm1_code":274,"adm1_name":"Baghlan"},{"adm1_code":275,"adm1_name":"Balkh"},{"adm1_code":276,"adm1_name":"Bamyan"},{"adm1_code":278,"adm1_name":"Faryab"},{"adm1_code":280,"adm1_name":"Ghor"},{"adm1_code":282,"adm1_name":"Hirat"},{"adm1_code":283,"adm1_name":"Jawzjan"},{"adm1_code":289,"adm1_name":"Kunduz"},{"adm…	2012-04-05	2023-09-25
2011-9363-MEX	No	nat-cli-dro-dro	Natural	Climatological	Drought	Drought			MEX	Mexico	Latin America and the Caribbean	Americas	Nuevo Leon, Guanajuato, Sonora, Chihuahua, Coahuila, Durango, Zacatecas, San Luis Potosi provinces			No	No	No			Km2				2011	9		2011	12				2500000		2500000							73.8228	[{"adm1_code":2033,"adm1_name":"Chihuahua"},{"adm1_code":2034,"adm1_name":"Coahuila"},{"adm1_code":2037,"adm1_name":"Durango"},{"adm1_code":2038,"adm1_name":"Guanajuato"},{"adm1_code":2046,"adm1_name":"Nuevo Leon"},{"adm1_code":2051,"adm1_name":"San Luis Potosi"},{"adm1_code":2053,"adm1_name":"Sonora"},{"adm1_code":2059,"adm1_name":"Zacatecas"}]	2012-01-06	2023-09-25
2011-9363-USA	No	nat-cli-dro-dro	Natural	Climatological	Drought	Drought			USA	United States of America	Northern America	Americas	Texas, Oklahoma, New Mexico, Arizona, Kansas, Louisiana provinces			No	No	No			Km2				2011	1		2011	11									1000000	1354596	8000000	10836768	73.8228	[{"adm1_code":3216,"adm1_name":"Arizona"},{"adm1_code":3230,"adm1_name":"Kansas"},{"adm1_code":3232,"adm1_name":"Louisiana"},{"adm1_code":3245,"adm1_name":"New Mexico"},{"adm1_code":3250,"adm1_name":"Oklahoma"},{"adm1_code":3257,"adm1_name":"Texas"}]	2012-04-05	2023-09-25
2011-9390-TUV	No	nat-cli-dro-dro	Natural	Climatological	Drought	Drought	GLIDE:DR-2011-000176		TUV	Tuvalu	Polynesia	Oceania	Nukulaelae Isl. Funati Islands	La Nina		Yes	No	Yes			Km2				2011	9		2011														73.8228	[{"adm1_code":3103,"adm1_name":"Administrative unit not available"}]	2011-11-09	2023-09-25
2011-9415-TZA	No	nat-cli-dro-dro	Natural	Climatological	Drought	Drought	GLIDE:DR-2011-000145		TZA	United Republic of Tanzania	Sub-Saharan Africa	Africa	Ngorongoro district (Arusha province), Simanjiro district (Manyara province), Same, Rombo, Mwanga districts (Kilimanjaro province)		Food shortage	No	No	No			Km2				2011	8		2012					1000000		1000000							73.8228	[{"adm2_code":190510,"adm2_name":"Ngorongoro"},{"adm2_code":48417,"adm2_name":"Rombo"},{"adm2_code":48418,"adm2_name":"Same"},{"adm2_code":190511,"adm2_name":"Mwanga"},{"adm2_code":48429,"adm2_name":"Simanjiro"}]	2013-03-25	2023-09-25
2011-9524-BFA	No	nat-cli-dro-dro	Natural	Climatological	Drought	Drought			BFA	Burkina Faso	Sub-Saharan Africa	Africa	Sahel, Centre-nord, Est, Centre-ouest and Centre-est provinces		Food shortage	No	Yes	No			Km2				2011	12		2012					2850000		2850000							73.8228	[{"adm1_code":40279,"adm1_name":"Centre-est"},{"adm1_code":40280,"adm1_name":"Centre-nord"},{"adm1_code":40281,"adm1_name":"Centre-ouest"},{"adm1_code":40283,"adm1_name":"Est"},{"adm1_code":40287,"adm1_name":"Sahel"}]	2014-05-05	2023-09-25
2011-9529-NER	No	nat-cli-dro-dro	Natural	Climatological	Drought	Drought			NER	Niger	Sub-Saharan Africa	Africa	Diffa, N'Guigmi districts (Diffa province); Dogondoutchi, Loga districts (Dosso province); Aguie, Guidan Roumji, Madarounfa, Mayahi districts (Maradi province); Bouza, Illela, Birni N'konni, Madaoua districts (Tahoua province); Filingue, Ouallam, Tera, Tillaberi (Tillaberi); Goure, Matamey, Tanout (Zinder)	Dry spells and pests, bad harvests 2010/2011	Food shortage	Yes	No	No			Km2				2011			2012					3000000		3000000							73.8228	[{"adm2_code":22554,"adm2_name":"Diffa"},{"adm2_code":22556,"adm2_name":"N'guigmi"},{"adm2_code":22558,"adm2_name":"Dogondoutchi"},{"adm2_code":22561,"adm2_name":"Loga"},{"adm2_code":22562,"adm2_name":"Aguie"},{"adm2_code":22564,"adm2_name":"Guidan Roumji"},{"adm2_code":22565,"adm2_name":"Madarounfa"},{"adm2_code":22566,"adm2_name":"Mayahi"},{"adm2_code":22571,"adm2_name":"Birni N'konni"},{"adm2_…	2014-05-05	2023-09-25
2011-9560-SEN	No	nat-cli-dro-dro	Natural	Climatological	Drought	Drought	GLIDE:OT-2011-000193		SEN	Senegal	Sub-Saharan Africa	Africa	Kaffrine, Kedougou, Tambacounda, Saint-Louis, Matam, Diourbel, Kolda, Kaolack, Fatick provinces, Louga, Linguere districts (Louga province)	Poor rainy season	Food shortage	Yes	No	No			Km2				2011	12		2013					850000		850000							73.8228	[{"adm1_code":1373,"adm1_name":"Kaolack"},{"adm1_code":1374,"adm1_name":"Kedougou"},{"adm1_code":1375,"adm1_name":"Kolda"},{"adm1_code":1377,"adm1_name":"Tambacounda"},{"adm1_code":1378,"adm1_name":"Kaffrine"},{"adm1_code":47585,"adm1_name":"Diourbel"},{"adm1_code":47586,"adm1_name":"Fatick"},{"adm1_code":47588,"adm1_name":"Matam"},{"adm1_code":47589,"adm1_name":"Saint louis"},{"adm2_code":25336,…	2014-07-29	2023-09-25
2011-9629-LSO	No	nat-cli-dro-dro	Natural	Climatological	Drought	Drought	GLIDE:OT-2012-000155		LSO	Lesotho	Sub-Saharan Africa	Africa	Quthing, Mohale's Hoek, Mafeteng, Maseru, Berea, Leribe, Butha Buthe, Mokhotlong, Thaba-Tseka provinces	Polonged periods of drought follwoed by excessive rains	Food shortage	No	No	No			Km2				2011	12		2012	10				725515		725515							73.8228	[{"adm1_code":1803,"adm1_name":"Berea"},{"adm1_code":1804,"adm1_name":"Butha Buthe"},{"adm1_code":1805,"adm1_name":"Leribe"},{"adm1_code":1806,"adm1_name":"Mafeteng"},{"adm1_code":1807,"adm1_name":"Maseru"},{"adm1_code":1808,"adm1_name":"Mohale's Hoek"},{"adm1_code":1809,"adm1_name":"Mokhotlong"},{"adm1_code":1811,"adm1_name":"Quthing"},{"adm1_code":1812,"adm1_name":"Thaba Tseka"}]	2014-07-29	2023-09-25
2011-9661-MLI	No	nat-cli-dro-dro	Natural	Climatological	Drought	Drought	GLIDE:OT-2011-000205		MLI	Mali	Sub-Saharan Africa	Africa	Kayes, Koulikoro, Mopti, Segou provinces	Insufficient rainfall	Food shortage	Yes	No	No			Km2				2011			2012					3500000		3500000							73.8228	[{"adm1_code":1928,"adm1_name":"Kayes"},{"adm1_code":1930,"adm1_name":"Koulikoro"},{"adm1_code":1931,"adm1_name":"Mopti"},{"adm1_code":1932,"adm1_name":"Segou"}]	2014-05-05	2023-09-25
2011-9662-MRT	No	nat-cli-dro-dro	Natural	Climatological	Drought	Drought	GLIDE:OT-2011-000205		MRT	Mauritania	Sub-Saharan Africa	Africa	Hodh El Chargi, Assaba, Brakna, Gorgol, Hodh El Gharbi, Guidimakha provinces	Lack of rains	Food shortage	Yes	No	Yes			Km2				2011			2012					723000		723000							73.8228	[{"adm1_code":2005,"adm1_name":"Assaba"},{"adm1_code":2006,"adm1_name":"Brakna"},{"adm1_code":2008,"adm1_name":"Gorgol"},{"adm1_code":2009,"adm1_name":"Guidimakha"},{"adm1_code":2010,"adm1_name":"Hodh Ech Chargi"},{"adm1_code":2011,"adm1_name":"Hodh El Gharbi"}]	2014-05-05	2023-09-25
2011-9663-ETH	No	nat-cli-dro-dro	Natural	Climatological	Drought	Drought	GLIDE:OT-2012-000049		ETH	Ethiopia	Sub-Saharan Africa	Africa	Dire Dawa, Gambela, Hareri, Oromia, SNNPR, Somali, Addis Ababa provinces (Southern Ethiopia)	Consecutive seasons of poor rainfall, rapid population growth, sustained high food prices, endemic poverty	Food shortage	No	No	No			Km2				2012			2012					1000000		1000000							75.3504	[{"adm1_code":1227,"adm1_name":"Addis Ababa"},{"adm1_code":1231,"adm1_name":"Dire Dawa"},{"adm1_code":1232,"adm1_name":"Gambela"},{"adm1_code":1233,"adm1_name":"Hareri"},{"adm1_code":1236,"adm1_name":"SNNPR"},{"adm1_code":47678,"adm1_name":"Oromia"},{"adm1_code":47679,"adm1_name":"Somali"}]	2014-04-30	2023-09-25
2011-9663-KEN	No	nat-cli-dro-dro	Natural	Climatological	Drought	Drought	GLIDE:OT-2012-000049		KEN	Kenya	Sub-Saharan Africa	Africa	Wajir, Mandera districts (North Eastern province), Turkana district (Rift Valley province), Tana river district (Coast province), Moyale, Marsabit, Mwingi districts (Eastern province)		Food shortage	Yes	No	No			Km2				2011			2012					3750000		3750000							73.8228	[{"adm2_code":51346,"adm2_name":"Tana River"},{"adm2_code":51352,"adm2_name":"Marsabit"},{"adm2_code":51357,"adm2_name":"Moyale"},{"adm2_code":51358,"adm2_name":"Mwingi"},{"adm2_code":51363,"adm2_name":"Mandera"},{"adm2_code":51364,"adm2_name":"Wajir"},{"adm2_code":51392,"adm2_name":"Turkana"}]	2014-04-30	2023-09-25
2011-9663-SDN	No	nat-cli-dro-dro	Natural	Climatological	Drought	Drought	GLIDE:OT-2012-000049		SDN	Sudan	Northern Africa	Africa	Abyei district (Southern Kordofan province)		Food shortage	No	No	No			Km2				2012			2012					3200000		3200000							75.3504	[{"adm2_code":4151,"adm2_name":"Abyei"}]	2012-06-12	2023-09-25
2011-9663-SOM	No	nat-cli-dro-dro	Natural	Climatological	Drought	Drought	GLIDE:OT-2012-000049		SOM	Somalia	Sub-Saharan Africa	Africa	Bakool, Gedo, Juba, Hiraan provinces		Food shortage	No	No	No			Km2				2012			2012					3000000		3000000							75.3504	[{"adm1_code":2689,"adm1_name":"Bakool"},{"adm1_code":2694,"adm1_name":"Gedo"},{"adm1_code":2695,"adm1_name":"Hiraan"},{"adm1_code":2696,"adm1_name":"Juba Hoose"},{"adm1_code":2698,"adm1_name":"Juba Dhexe"}]	2012-06-12	2023-09-25
2012-9021-PRY	No	nat-cli-dro-dro	Natural	Climatological	Drought	Drought	GLIDE:DR-2012-000011		PRY	Paraguay	Latin America and the Caribbean	Americas	Concepcion, San pedro, Cordillera, Guaira, Caaguazu, Caazapa, Itapua, Misiones, Paraguari, Alto Parana, Central, Neembucu, Amambay, Canindeyu provinces	Environmenatl effectes associated with la Nina lead to disruption of rain patterns	Food shortage	No	No	Yes	132		Km2				2012	1		2012	1				1391900		1391900							75.3504	[{"adm1_code":2312,"adm1_name":"Alto Parana"},{"adm1_code":2313,"adm1_name":"Amambay"},{"adm1_code":2315,"adm1_name":"Caaguazu"},{"adm1_code":2316,"adm1_name":"Caazapa"},{"adm1_code":2317,"adm1_name":"Canindeyu"},{"adm1_code":2318,"adm1_name":"Central"},{"adm1_code":2319,"adm1_name":"Concepcion"},{"adm1_code":2320,"adm1_name":"Cordillera"},{"adm1_code":2321,"adm1_name":"Guaira"},{"adm1_code":2322…	2012-01-31	2023-09-25
2012-9065-AGO	No	nat-cli-dro-dro	Natural	Climatological	Drought	Drought	GLIDE:DR-2012-000092		AGO	Angola	Sub-Saharan Africa	Africa	Bengo, Cuanza Sul, Benguela, Huila, Namibe, Cunene, Moxico, Bie, Huambo, Zaire, Kuando Kubango provinces	Lack of rain	Food shortage	Yes	No	No			Km2				2012	3		2013	5				1833900		1833900							75.3504	[{"adm1_code":398,"adm1_name":"Bengo"},{"adm1_code":399,"adm1_name":"Benguela"},{"adm1_code":400,"adm1_name":"Bie"},{"adm1_code":402,"adm1_name":"Cuando Cubango"},{"adm1_code":403,"adm1_name":"Cuanza Sul"},{"adm1_code":404,"adm1_name":"Cunene"},{"adm1_code":405,"adm1_name":"Huambo"},{"adm1_code":406,"adm1_name":"Huila"},{"adm1_code":412,"adm1_name":"Moxico"},{"adm1_code":413,"adm1_name":"Namibe"}…	2014-07-29	2024-02-06
2012-9109-THA	No	nat-cli-dro-dro	Natural	Climatological	Drought	Drought			THA	Thailand	South-eastern Asia	Asia	Lampang, Kamphaeng Phet, Nan, Phayao, Chiang Mai, Sukhothai (Northern provinces); Nong Khai, Si Sa Ket, Khon Kaen, Maha Sarakham, Udon Thani, Chaiyaphum (NorthEast provinces); Phetchaburi, Kanchanaburi, Prachuap Khiri Khan, Chon Buri, Nakhon Nayok, Suphan Buri, Chanthaburi, Chachoengsao, Trat, Phuket provinces. 17 are in the North, 19 in the Northeast, 5 in the central region, 6 in the East and 1…			No	No	Yes			Km2				2012	4		2012	8				12000000		12000000					1200	1593	75.3504	[{"adm1_code":2851,"adm1_name":"Amnat Charoen"},{"adm1_code":2854,"adm1_name":"Buriram"},{"adm1_code":2855,"adm1_name":"Chachoengsao"},{"adm1_code":2857,"adm1_name":"Chaiyaphum"},{"adm1_code":2858,"adm1_name":"Chanthaburi"},{"adm1_code":2859,"adm1_name":"Chiang Mai"},{"adm1_code":2860,"adm1_name":"Chiang Rai"},{"adm1_code":2861,"adm1_name":"Chonburi"},{"adm1_code":2863,"adm1_name":"Kalasin"},{"ad…	2012-04-25	2024-04-09
2012-9160-TCD	No	nat-cli-dro-dro	Natural	Climatological	Drought	Drought	GLIDE:EO-2012-000001		TCD	Chad	Sub-Saharan Africa	Africa	Kanem, Lac Barl el Gazal, Batha Est, Batha Ouest, Hadjer Lamis, Ouaddai, Salamat provinces	Insufficent rains	Food shortage	No	No	No			Km2				2012	6		2013	2				1600000		1600000							75.3504	[{"adm1_code":875,"adm1_name":"Lac"},{"adm1_code":881,"adm1_name":"Salamat"},{"adm1_code":12904,"adm1_name":"Batha Est"},{"adm1_code":12905,"adm1_name":"Batha Ouest"},{"adm1_code":12912,"adm1_name":"Hadjer Lamis"},{"adm1_code":12914,"adm1_name":"Barl El Gazal"},{"adm1_code":12915,"adm1_name":"Kanem"},{"adm1_code":12927,"adm1_name":"Ouaddai"}]	2013-02-25	2023-09-25
2012-9222-PRK	No	nat-cli-dro-dro	Natural	Climatological	Drought	Drought			PRK	Democratic People's Republic of Korea	Eastern Asia	Asia	Yanggang-do, Chagang-do, Hamgyong-bukto, Hamgyong-namdo, Kangwon-do provinces		Food shortage	No	No	No			Km2				2012	4		2012					3000000		3000000							75.3504	[{"adm1_code":1054,"adm1_name":"Chagang-do"},{"adm1_code":1056,"adm1_name":"Kangwon-do"},{"adm1_code":1058,"adm1_name":"Hamgyong-bukto"},{"adm1_code":1062,"adm1_name":"Hamgyong-namdo"},{"adm1_code":1065,"adm1_name":"Yanggang-do"}]	2012-07-19	2023-09-25
2012-9235-USA	No	nat-cli-dro-dro	Natural	Climatological	Drought	Drought			USA	United States of America	Northern America	Americas	Illinois, Indiana, Iowa, Kansas, Michigan, Minnesota, Missouri, Nebraska, North Dakota, Ohio, South Dakota, Wisconsin provinces		Heat wave	No	No	No			Km2				2012	6		2012														75.3504	[{"adm1_code":3227,"adm1_name":"Illinois"},{"adm1_code":3228,"adm1_name":"Indiana"},{"adm1_code":3229,"adm1_name":"Iowa"},{"adm1_code":3230,"adm1_name":"Kansas"},{"adm1_code":3236,"adm1_name":"Michigan"},{"adm1_code":3237,"adm1_name":"Minnesota"},{"adm1_code":3239,"adm1_name":"Missouri"},{"adm1_code":3241,"adm1_name":"Nebraska"},{"adm1_code":3248,"adm1_name":"North Dakota"},{"adm1_code":3249,"adm…	2012-07-19	2023-09-25
2012-9245-GMB	No	nat-cli-dro-dro	Natural	Climatological	Drought	Drought	GLIDE:OT-2012-000046		GMB	Gambia	Sub-Saharan Africa	Africa	NO DATA: all country selected - North Bank, Lower River (mainly?), Upper River, West Coast, Kanifing Municipal Council, Central River provinces	Late, erratic and unevenly distributed rainbfall during 2011/2012	Crop failure|Food shortage	Yes	No	Yes			Km2				2012	3		2012					428000		428000							75.3504	[{"adm1_code":1285,"adm1_name":"Central River"},{"adm1_code":1287,"adm1_name":"Lower River"},{"adm1_code":1288,"adm1_name":"North Bank"},{"adm1_code":1289,"adm1_name":"Upper River"},{"adm1_code":1290,"adm1_name":"West Coast"},{"adm1_code":112869,"adm1_name":"Kanifing Municipal Council"}]	2012-07-23	2023-09-25
2012-9290-ITA	No	nat-cli-dro-dro	Natural	Climatological	Drought	Drought			ITA	Italy	Southern Europe	Europe	Abruzzi, Basilicata, Calabria, Campania, Emilia-romagna, Friuli-venezia Giulia, Lazio, Liguria, Lombardia, Marche, Molise, Piemonte, Puglia, Sardegna, Sicilia, Toscana, Trentino-alto Adige, Umbria, Valle D'aosta, Veneto provinces		Heat wave	No	No	No			Km2				2012	6	1	2012	10	10										1190000	1579289	75.3504	[{"adm1_code":1616,"adm1_name":"Abruzzi"},{"adm1_code":1617,"adm1_name":"Basilicata"},{"adm1_code":1618,"adm1_name":"Calabria"},{"adm1_code":1619,"adm1_name":"Campania"},{"adm1_code":1620,"adm1_name":"Emilia-romagna"},{"adm1_code":1621,"adm1_name":"Friuli-venezia Giulia"},{"adm1_code":1622,"adm1_name":"Lazio"},{"adm1_code":1623,"adm1_name":"Liguria"},{"adm1_code":1624,"adm1_name":"Lombardia"},{"a…	2013-03-28	2023-09-25
2012-9304-MWI	No	nat-cli-dro-dro	Natural	Climatological	Drought	Drought	GLIDE:OT-2012-000156		MWI	Malawi	Sub-Saharan Africa	Africa	Balaka, Blantyre, Chikwawa, Machinga, Mangochi, Mulanje, Mwanza, Neno, Nsanje, Phalombe, Thyolo, Zomba districts (Southern Region Province), Dedza, Ntcheu, Salima districts (Central Region Province)	Lenthly dry spells overt past 3 years, current high food prices and recent devaluation of the currency	Food shortage	Yes	No	No			Km2				2012	8		2013					1900000		1900000							75.3504	[{"adm2_code":19307,"adm2_name":"Dedza"},{"adm2_code":19313,"adm2_name":"Ntcheu"},{"adm2_code":19315,"adm2_name":"Salima"},{"adm2_code":19321,"adm2_name":"Blantyre"},{"adm2_code":19322,"adm2_name":"Chikwawa"},{"adm2_code":19325,"adm2_name":"Mangochi"},{"adm2_code":19328,"adm2_name":"Nsanje"},{"adm2_code":19329,"adm2_name":"Thyolo"},{"adm2_code":19330,"adm2_name":"Zomba"},{"adm2_code":42174,"adm2_…	2014-07-29	2023-09-25
2012-9355-GTM	No	nat-cli-dro-dro	Natural	Climatological	Drought	Drought			GTM	Guatemala	Latin America and the Caribbean	Americas	Jalapa, El Progreso, Zacapa, Santa Rosa, Guatemala, Sacatepéquez, Solola, Chimaltenango, Baja Verapaz, Quiché, Huehuetenango provinces		Heat wave	No	No	No			Km2				2012	6		2012					266485		266485							75.3504	[{"adm1_code":64821,"adm1_name":"Guatemala"},{"adm1_code":64822,"adm1_name":"El Progreso"},{"adm1_code":64823,"adm1_name":"Sacatepéquez"},{"adm1_code":64824,"adm1_name":"Chimaltenango"},{"adm1_code":64826,"adm1_name":"Santa Rosa"},{"adm1_code":64827,"adm1_name":"Sololá"},{"adm1_code":64833,"adm1_name":"Huehuetenango"},{"adm1_code":64834,"adm1_name":"Quiché"},{"adm1_code":64835,"adm1_name":"Baja V…	2012-09-14	2023-09-25
2012-9379-HND	No	nat-cli-dro-dro	Natural	Climatological	Drought	Drought			HND	Honduras	Latin America and the Caribbean	Americas	Choluteca, Francisco Morazan, Gracias A Dios, La Paz, Olancho, Paraiso, Valle provinces			No	No	No			Km2				2012	9		2012	9				125000		125000							75.3504	[{"adm1_code":1421,"adm1_name":"Choluteca"},{"adm1_code":1426,"adm1_name":"Francisco Morazan"},{"adm1_code":1427,"adm1_name":"Gracias A Dios"},{"adm1_code":1430,"adm1_name":"La Paz"},{"adm1_code":1434,"adm1_name":"Olancho"},{"adm1_code":1435,"adm1_name":"Paraiso"},{"adm1_code":1437,"adm1_name":"Valle"}]	2012-09-21	2023-09-25
2012-9395-RUS	No	nat-cli-dro-dro	Natural	Climatological	Drought	Drought			RUS	Russian Federation	Eastern Europe	Europe	Adygeya Rep., Astrakhanskaya Oblast, Bashkortostan Rep., Belgorodskaya Oblast, Bryanskaya Oblast, Chelyabinskaya Oblast, Kalmykiya Rep., Krasnodarskiy Kray, Kurskaya Oblast, Lipetskaya Oblast, Name Unknown, Orenburgskaya Oblast, Orlovskaya Oblast, Penzenskaya Oblast, Rostovskaya Oblast, Samarskaya Oblast, Saratovskaya Oblast, Stavropolskiy Kray, Tambovskaya Oblast, Ulyanovskaya Oblast, Volgograds…			No	No	No			Km2				2012	6	1	2012	8	31										1140000	1512932	75.3504	[{"adm1_code":2487,"adm1_name":"Adygeya Rep."},{"adm1_code":2493,"adm1_name":"Astrakhanskaya Oblast"},{"adm1_code":2494,"adm1_name":"Bashkortostan Rep."},{"adm1_code":2495,"adm1_name":"Belgorodskaya Oblast"},{"adm1_code":2496,"adm1_name":"Bryanskaya Oblast"},{"adm1_code":2499,"adm1_name":"Chelyabinskaya Oblast"},{"adm1_code":2510,"adm1_name":"Kalmykiya Rep."},{"adm1_code":2524,"adm1_name":"Krasno…	2012-10-23	2023-09-25
2012-9405-LKA	No	nat-cli-dro-dro	Natural	Climatological	Drought	Drought	GLIDE:DR-2012-000177		LKA	Sri Lanka	Southern Asia	Asia	Anuradhapura, Polonnaruwa districts (North Central province), Kurunegala, Puttalam districts (North Western province), Moneragala district (Uva province), Hambantota district (Southern province), Mannar district (Northern province)			No	No	No			Km2				2012	1		2012	11				1800000		1800000							75.3504	[{"adm2_code":25835,"adm2_name":"Anuradhapura"},{"adm2_code":25836,"adm2_name":"Polonnaruwa"},{"adm2_code":25837,"adm2_name":"Kurunegala"},{"adm2_code":25838,"adm2_name":"Puttalam"},{"adm2_code":25841,"adm2_name":"Mannar"},{"adm2_code":25847,"adm2_name":"Hambantota"},{"adm2_code":25850,"adm2_name":"Moneragala"}]	2013-04-09	2023-09-25
2012-9478-MDA	No	nat-cli-dro-dro	Natural	Climatological	Drought	Drought	GLIDE:DR-2012-000199		MDA	Republic of Moldova	Eastern Europe	Europe	Falesti district (Balti province), Vulcanesti district (Cahul province), Chisinau, Criuleni, Ialoveni districts (Chisinau province), Ciadir-Lunga district (Gagauzia province), Basarabeasca district (Lapusna province), Orhei, Rezina, Telenesti districts (Orhei province), Ungheni district (Ungheni province)	Combined impact of poor rainfall and extremely high temperatures		No	No	No			Km2				2012	11		2012					5800		5800							75.3504	[{"adm2_code":41167,"adm2_name":"Falesti"},{"adm2_code":41174,"adm2_name":"Vulcanesti"},{"adm2_code":41176,"adm2_name":"Criuleni"},{"adm2_code":41177,"adm2_name":"Ialoveni"},{"adm2_code":41179,"adm2_name":"Chisinau"},{"adm2_code":41191,"adm2_name":"Ciadir-Lunga"},{"adm2_code":41193,"adm2_name":"Basarabeasca"},{"adm2_code":41197,"adm2_name":"Orhei"},{"adm2_code":41198,"adm2_name":"Rezina"},{"adm2_…	2012-12-19	2023-09-25
2012-9489-USA	No	nat-cli-dro-dro	Natural	Climatological	Drought	Drought			USA	United States of America	Northern America	Americas	Illinois, Indiana, Iowa, Kansas, Michigan, Minnesota, Missouri, Nebraska, North Dakota, Ohio, South Dakota, Wisconsin, Arizona, California, Colorado, Nevada, New Mexico, Oklahoma, Texas, Utah provinces	Severe lack of rainand extreme temperature	Heat wave	No	No	Yes			Km2				2012	6		2012	12									16000000	21234132	20000000	26542664	75.3504	[{"adm1_code":3216,"adm1_name":"Arizona"},{"adm1_code":3218,"adm1_name":"California"},{"adm1_code":3219,"adm1_name":"Colorado"},{"adm1_code":3227,"adm1_name":"Illinois"},{"adm1_code":3228,"adm1_name":"Indiana"},{"adm1_code":3229,"adm1_name":"Iowa"},{"adm1_code":3230,"adm1_name":"Kansas"},{"adm1_code":3236,"adm1_name":"Michigan"},{"adm1_code":3237,"adm1_name":"Minnesota"},{"adm1_code":3239,"adm1_n…	2013-03-08	2023-09-25
2012-9606-UKR	No	nat-cli-dro-dro	Natural	Climatological	Drought	Drought			UKR	Ukraine	Eastern Europe	Europe	Amury city (Odes'ka province)			No	No	No			Km2				2012	4	15	2012	7	31										1690000	2242855	75.3504	[{"adm1_code":3163,"adm1_name":"Odes'ka"}]	2013-03-28	2023-09-25
2012-9607-BRA	No	nat-cli-dro-dro	Natural	Climatological	Drought	Drought			BRA	Brazil	Latin America and the Caribbean	Americas	Minas Gerias, Pernambuco, Bahia provinces			No	No	No			Km2				2012	5		2013	5				4000000		4000000					1460000	1937615	75.3504	[{"adm1_code":669,"adm1_name":"Bahia"},{"adm1_code":677,"adm1_name":"Minas Gerais"},{"adm1_code":681,"adm1_name":"Pernambuco"}]	2013-07-04	2023-09-25
2012-9628-CMR	No	nat-cli-dro-dro	Natural	Climatological	Drought	Drought			CMR	Cameroon	Sub-Saharan Africa	Africa	Nord, Extrème-Nord provinces (Northern regions)			Yes	No	No			Km2				2012	6		2012	12				12000		12000							75.3504	[{"adm1_code":818,"adm1_name":"Extrême - Nord"},{"adm1_code":820,"adm1_name":"Nord"}]	2014-05-05	2023-09-25
2013-9062-CHN	No	nat-cli-dro-dro	Natural	Climatological	Drought	Drought			CHN	China	Eastern Asia	Asia	Yunnan Sheng, Sichuan Sheng, Shaanxi Sheng, Qinghai Sheng, Shanxi Sheng, Gansu Sheng provinces			No	No	No			Km2				2013	1		2013	7				5000000		5000000							76.4541	[{"adm1_code":902,"adm1_name":"Gansu Sheng"},{"adm1_code":919,"adm1_name":"Qinghai Sheng"},{"adm1_code":920,"adm1_name":"Shaanxi Sheng"},{"adm1_code":923,"adm1_name":"Shanxi Sheng"},{"adm1_code":924,"adm1_name":"Sichuan Sheng"},{"adm1_code":929,"adm1_name":"Yunnan Sheng"}]	2014-01-10	2023-09-25
2013-9146-NAM	No	nat-cli-dro-dro	Natural	Climatological	Drought	Drought	GLIDE:DR-2013-000062		NAM	Namibia	Sub-Saharan Africa	Africa	Kavango, Ohangwena, Oshikoto, Kunene provinces	Limited rainfall	Food shortage	Yes	Yes	Yes			Km2				2013	1		2014	1				780000		780000					64000	83710	76.4541	[{"adm1_code":2141,"adm1_name":"Kavango"},{"adm1_code":2143,"adm1_name":"Kunene"},{"adm1_code":2144,"adm1_name":"Ohangwena"},{"adm1_code":2148,"adm1_name":"Oshikoto"}]	2014-07-29	2023-09-25
2013-9150-MHL	No	nat-cli-dro-dro	Natural	Climatological	Drought	Drought	GLIDE:DR-2013-000053		MHL	Marshall Islands	Micronesia	Oceania	North of the capital Majuro, atolls/islands of Namu, Likiep and Mejit	Prolonged dry weather		No	No	Yes			Km2				2013	5		2013	5				6384		6384							76.4541	[{"adm1_code":2002,"adm1_name":"Administrative unit not available"}]	2014-07-29	2023-09-25
2013-9185-PAN	No	nat-cli-dro-dro	Natural	Climatological	Drought	Drought			PAN	Panama	Latin America and the Caribbean	Americas	Coclé, Veraguas, Los santos, Herrera provinces			No	No	Yes			Km2				2013	1		2013	5											200000	261595	76.4541	[{"adm1_code":2282,"adm1_name":"Coclé"},{"adm1_code":2286,"adm1_name":"Herrera"},{"adm1_code":2287,"adm1_name":"Los Santos"},{"adm1_code":93673,"adm1_name":"Veraguas"}]	2013-07-04	2023-09-25
2013-9203-NZL	No	nat-cli-dro-dro	Natural	Climatological	Drought	Drought			NZL	New Zealand	Australia and New Zealand	Oceania	Auckland, Bay of Plenty, East Cape, Hawke's Bay, Northland, Taranaki, Waikato, Wanganui-manawatu, Wellington provinces (North Island)			No	No	No			Km2				2013	1		2013	5											823000	1076462	76.4541	[{"adm1_code":2171,"adm1_name":"Auckland"},{"adm1_code":2172,"adm1_name":"Bay Of Plenty"},{"adm1_code":2174,"adm1_name":"East Cape"},{"adm1_code":2175,"adm1_name":"Hawke's Bay"},{"adm1_code":2177,"adm1_name":"Northland"},{"adm1_code":2180,"adm1_name":"Taranaki"},{"adm1_code":2181,"adm1_name":"Waikato"},{"adm1_code":2182,"adm1_name":"Wanganui-manawatu"},{"adm1_code":2183,"adm1_name":"Wellington"}]	2014-03-20	2023-09-25
2013-9308-ECU	No	nat-cli-dro-dro	Natural	Climatological	Drought	Drought	GLIDE:DR-2013-000069		ECU	Ecuador	Latin America and the Caribbean	Americas	Zapotillo, Celica, Paltas, Macara, Sozoranga districts (Loja province)			No	No	No			Km2				2013	2		2013	6				3165		3165							76.4541	[{"adm2_code":15448,"adm2_name":"Celica"},{"adm2_code":15453,"adm2_name":"Macara"},{"adm2_code":15459,"adm2_name":"Sozoranga"},{"adm2_code":15460,"adm2_name":"Zapotillo"},{"adm2_code":22049,"adm2_name":"Paltas"}]	2014-01-14	2023-09-25
2013-9369-BOL	No	nat-cli-dro-dro	Natural	Climatological	Drought	Drought			BOL	Bolivia (Plurinational State of)	Latin America and the Caribbean	Americas	Tarija, Santa Cruz, Chuquisaca, Cochabamba, Beni, La Paz provinces			No	No	Yes			Km2				2013	1		2013	9				340355		340355							76.4541	[{"adm1_code":40443,"adm1_name":"Beni"},{"adm1_code":40444,"adm1_name":"Chuquisaca"},{"adm1_code":40445,"adm1_name":"Cochabamba"},{"adm1_code":40446,"adm1_name":"La Paz"},{"adm1_code":40449,"adm1_name":"Santa Cruz"},{"adm1_code":40450,"adm1_name":"Tarija"}]	2014-01-14	2023-09-25
2013-9478-ZWE	No	nat-cli-dro-dro	Natural	Climatological	Drought	Drought	GLIDE:OT-2013-000150		ZWE	Zimbabwe	Sub-Saharan Africa	Africa	Manicaland, Masvingo, Matabeleland North, Matabeleland South, Mashonaland Central, Midlands provinces	Slow onset of rainy season followed by severe flooding and then long dry spell, El Nino	Food shortage|Water shortage	Yes	No	Yes			Km2				2013	1		2017	1				4300000		4300000					500000	653987	76.4541	[{"adm1_code":3437,"adm1_name":"Manicaland"},{"adm1_code":3438,"adm1_name":"Mashonaland Central"},{"adm1_code":3441,"adm1_name":"Masvingo"},{"adm1_code":3443,"adm1_name":"Matabeleland South"},{"adm1_code":3444,"adm1_name":"Midlands"},{"adm1_code":69549,"adm1_name":"Matabeleland North"},{"adm1_code":69550,"adm1_name":"Mashonaland East"}]	2015-10-28	2023-09-25
2013-9496-PRY	No	nat-cli-dro-dro	Natural	Climatological	Drought	Drought	GLIDE:DR-2013-000128		PRY	Paraguay	Latin America and the Caribbean	Americas	Presidente Hayes, Boqueron, Alto Paraguay, San Pedro, Concepcion, Amambay, Canindeyu, Alto Parana, Itapua, Cordillera, Guaira, Neembucu, Paraguari, Caazapa, Caaguazu provinces	Rainfall shortages		No	No	Yes			Km2				2013	9		2014	8				75000		75000							76.4541	[{"adm1_code":2311,"adm1_name":"Alto Paraguay"},{"adm1_code":2312,"adm1_name":"Alto Parana"},{"adm1_code":2313,"adm1_name":"Amambay"},{"adm1_code":2314,"adm1_name":"Boqueron"},{"adm1_code":2315,"adm1_name":"Caaguazu"},{"adm1_code":2316,"adm1_name":"Caazapa"},{"adm1_code":2317,"adm1_name":"Canindeyu"},{"adm1_code":2319,"adm1_name":"Concepcion"},{"adm1_code":2320,"adm1_name":"Cordillera"},{"adm1_co…	2014-04-09	2023-09-25
2014-9023-USA	No	nat-cli-dro-dro	Natural	Climatological	Drought	Drought			USA	United States of America	Northern America	Americas	San Joaquin district (California province)			No	No	No			Km2				2014	1		2014	12											2200000	2831607	77.6944	[{"adm2_code":28903,"adm2_name":"San Joaquin"}]	2014-05-09	2023-09-25
2014-9025-BRA	No	nat-cli-dro-dro	Natural	Climatological	Drought	Drought			BRA	Brazil	Latin America and the Caribbean	Americas	Alagoas, Bahia, Ceara, Maranhao, Paraiba, Pernambuco, Piaui, Rio Grande Do Norte, Sergipe provinces	Lack of rain 2012 and 2013, high temperatures		No	No	No			Km2				2014	1		2016	12				27000000		27000000					5000000	6435470	77.6944	[{"adm1_code":666,"adm1_name":"Alagoas"},{"adm1_code":669,"adm1_name":"Bahia"},{"adm1_code":670,"adm1_name":"Ceara"},{"adm1_code":674,"adm1_name":"Maranhao"},{"adm1_code":679,"adm1_name":"Paraiba"},{"adm1_code":681,"adm1_name":"Pernambuco"},{"adm1_code":682,"adm1_name":"Piaui"},{"adm1_code":684,"adm1_name":"Rio Grande Do Norte"},{"adm1_code":690,"adm1_name":"Sergipe"}]	2014-06-11	2023-09-25
2014-9102-HTI	No	nat-cli-dro-dro	Natural	Climatological	Drought	Drought			HTI	Haiti	Latin America and the Caribbean	Americas	Macaya area (Cayes district, Sud province), Nord province	Scarcity of rain	Food shortage	No	No	Yes			Km2				2014	1		2015	7				1000000		1000000					2000	2574	77.6944	[{"adm1_code":1412,"adm1_name":"Nord"},{"adm2_code":17203,"adm2_name":"Cayes"}]	2014-04-11	2023-09-25
2014-9196-BFA	No	nat-cli-dro-dro	Natural	Climatological	Drought	Drought			BFA	Burkina Faso	Sub-Saharan Africa	Africa	Sahel province		Food shortage	No	No	No			Km2				2014	5		2014					4000000		4000000							77.6944	[{"adm1_code":40287,"adm1_name":"Sahel"}]	2014-06-27	2023-09-25
2014-9231-SOM	No	nat-cli-dro-dro	Natural	Climatological	Drought	Drought			SOM	Somalia	Sub-Saharan Africa	Africa	Mogasdischio city (Banadir district, Banadir province), Bakool, Gedo, Juba Dhexe, Hiraan, Shabelle Hoose; Puntland, Bari, Karkaar, Sanaag Sool	Short and poorrainy season	Famine|Food shortage	No	No	No			Km2				2014	7		2017					535624		535624							77.6944	[{"adm1_code":2689,"adm1_name":"Bakool"},{"adm1_code":2690,"adm1_name":"Bari"},{"adm1_code":2694,"adm1_name":"Gedo"},{"adm1_code":2695,"adm1_name":"Hiraan"},{"adm1_code":2697,"adm1_name":"Shabelle Hoose"},{"adm1_code":2698,"adm1_name":"Juba Dhexe"},{"adm1_code":2701,"adm1_name":"Nugaal"},{"adm1_code":2702,"adm1_name":"Sanaag"},{"adm1_code":2703,"adm1_name":"Sool"},{"adm2_code":25672,"adm2_name":"…	2014-07-22	2024-02-06
2014-9265-CHN	No	nat-cli-dro-dro	Natural	Climatological	Drought	Drought			CHN	China	Eastern Asia	Asia	Shandong Sheng, Shaanxi Sheng, Henan Sheng provinces, Nanbu-Nanchong city (Nanchong district, Sichuan Sheng ptovince)			No	No	No			Km2				2014	6		2014	7				226000		226000					1180000	1518771	77.6944	[{"adm1_code":909,"adm1_name":"Henan Sheng"},{"adm1_code":920,"adm1_name":"Shaanxi Sheng"},{"adm1_code":921,"adm1_name":"Shandong Sheng"},{"adm1_code":924,"adm1_name":"Sichuan Sheng"}]	2014-08-28	2023-09-25
2014-9277-GTM	No	nat-cli-dro-dro	Natural	Climatological	Drought	Drought	GLIDE:DR-2015-000150		GTM	Guatemala	Latin America and the Caribbean	Americas	Baja Verapaz, El Progreso, Zacapa, Chiquimula, Jalapa, Jutiapa, Quiché, Huehuetenango, Totonicapán, San Marcos, Retalhuleu, Santa Rosa, Escuintla provinces			No	No	Yes			Km2				2014	8		2016					1300000		1300000					58000	74651	77.6944	[{"adm1_code":64822,"adm1_name":"El Progreso"},{"adm1_code":64825,"adm1_name":"Escuintla"},{"adm1_code":64826,"adm1_name":"Santa Rosa"},{"adm1_code":64828,"adm1_name":"Totonicapán"},{"adm1_code":64831,"adm1_name":"Retalhuleu"},{"adm1_code":64832,"adm1_name":"San Marcos"},{"adm1_code":64833,"adm1_name":"Huehuetenango"},{"adm1_code":64834,"adm1_name":"Quiché"},{"adm1_code":64835,"adm1_name":"Baja V…	2014-09-01	2023-09-25
2014-9332-HND	No	nat-cli-dro-dro	Natural	Climatological	Drought	Drought	GLIDE:DR-2014-000132		HND	Honduras	Latin America and the Caribbean	Americas	San Marcos De Sierra, Camasca districts (Intibuca province), Moroceli, Alauca, Oropoli, Teupasenti districts (Paraiso province), Ocotepeque, Copan, Santa Barbara, Yoro, Comayagua, Olancho, Lempira, La Paz, Valle, Choluteca, Francisco Morazan provinces		Food shortage	No	No	Yes			Km2				2014	4		2015	7				2023000		2023000							77.6944	[{"adm1_code":1421,"adm1_name":"Choluteca"},{"adm1_code":1423,"adm1_name":"Comayagua"},{"adm1_code":1424,"adm1_name":"Copan"},{"adm1_code":1426,"adm1_name":"Francisco Morazan"},{"adm1_code":1430,"adm1_name":"La Paz"},{"adm1_code":1431,"adm1_name":"Lempira"},{"adm1_code":1433,"adm1_name":"Ocotepeque"},{"adm1_code":1434,"adm1_name":"Olancho"},{"adm1_code":1436,"adm1_name":"Santa Barbara"},{"adm1_co…	2014-09-30	2023-09-25
2014-9393-LKA	No	nat-cli-dro-dro	Natural	Climatological	Drought	Drought			LKA	Sri Lanka	Southern Asia	Asia	Mullattivu, Kilinochchi, Mannar, Vavuniya, Jaffna districts (Northern province), Moneragala district (Uva province), Ampara, Batticaloa, Trincomalee districts (Eastern province), Anuradhapura, Polonnaruwa districts (North Central province), Kurunegala, Puttalam districts (North Western province), Hambantota, Galle districts (Southern province)			No	No	No			Km2				2014	1		2014	8				1800000		1800000					25000	32177	77.6944	[{"adm2_code":25832,"adm2_name":"Ampara"},{"adm2_code":25833,"adm2_name":"Batticaloa"},{"adm2_code":25834,"adm2_name":"Trincomalee"},{"adm2_code":25835,"adm2_name":"Anuradhapura"},{"adm2_code":25836,"adm2_name":"Polonnaruwa"},{"adm2_code":25837,"adm2_name":"Kurunegala"},{"adm2_code":25838,"adm2_name":"Puttalam"},{"adm2_code":25839,"adm2_name":"Jaffna"},{"adm2_code":25840,"adm2_name":"Kilinochchi"…	2014-09-23	2023-09-25
2014-9404-KEN	No	nat-cli-dro-dro	Natural	Climatological	Drought	Drought			KEN	Kenya	Sub-Saharan Africa	Africa	Mandera, Wajir districts (North Eastern province) Turkana, Baringo, Samburu districts (Rift Valley province), Marsabit district (Eastern province)			No	No	No			Km2				2014	1		2015	5				1600000		1600000							77.6944	[{"adm2_code":51352,"adm2_name":"Marsabit"},{"adm2_code":51363,"adm2_name":"Mandera"},{"adm2_code":51364,"adm2_name":"Wajir"},{"adm2_code":51377,"adm2_name":"Baringo"},{"adm2_code":51389,"adm2_name":"Samburu"},{"adm2_code":51392,"adm2_name":"Turkana"}]	2014-10-15	2023-09-25
2014-9408-CHN	No	nat-cli-dro-dro	Natural	Climatological	Drought	Drought			CHN	China	Eastern Asia	Asia	Liaoning Sheng, Jilin Sheng, Nei Mongol Zizhiqu provinces			No	No	No			Km2				2014	8		2014	10				27500000		27500000			110000	141580	2500000	3217735	77.6944	[{"adm1_code":915,"adm1_name":"Jilin Sheng"},{"adm1_code":916,"adm1_name":"Liaoning Sheng"},{"adm1_code":917,"adm1_name":"Nei Mongol Zizhiqu"}]	2014-10-15	2023-09-25
2014-9428-THA	No	nat-cli-dro-dro	Natural	Climatological	Drought	Drought			THA	Thailand	South-eastern Asia	Asia	Ang Thong, Bangkok, Buriram, Chachoengsao, Chainat, Chaiyaphum, Chanthaburi, Chiang Mai, Chiang Rai, Chonburi, Chumphon, Kalasin, Kampaeng Phet, Kanchanaburi, Khon Kaen, Krabi, Lampang, Lamphun, Loei, Lopburi, Mae Hong Son, Maha Sarakham, Mukdahan, Nakhon Nayok, Nakhon Pathom, Nakhon Phanom, Nakhon Ratchasima, Nakhon Sawan, Nakhon Si Thammarat, Nan Narathiwat, Nong Khai, Nonthaburi, Pathum Thani,…	Dry conditions		No	No	Yes			Km2				2014	3		2014	3													77.6944	[{"adm1_code":2851,"adm1_name":"Amnat Charoen"},{"adm1_code":2852,"adm1_name":"Ang Thong"},{"adm1_code":2853,"adm1_name":"Bangkok"},{"adm1_code":2854,"adm1_name":"Buriram"},{"adm1_code":2855,"adm1_name":"Chachoengsao"},{"adm1_code":2856,"adm1_name":"Chainat"},{"adm1_code":2857,"adm1_name":"Chaiyaphum"},{"adm1_code":2858,"adm1_name":"Chanthaburi"},{"adm1_code":2859,"adm1_name":"Chiang Mai"},{"adm1…	2014-10-28	2023-09-25
2014-9429-MYS	No	nat-cli-dro-dro	Natural	Climatological	Drought	Drought			MYS	Malaysia	South-eastern Asia	Asia	Kedah, Perak, Perlis, Pulau Pinang, Selangor provinces			No	No	No			Km2				2014	3		2014	3				2200000		2200000							77.6944	[{"adm1_code":1892,"adm1_name":"Kedah"},{"adm1_code":1898,"adm1_name":"Perak"},{"adm1_code":1899,"adm1_name":"Perlis"},{"adm1_code":1900,"adm1_name":"Pulau Pinang"},{"adm1_code":1903,"adm1_name":"Selangor"}]	2014-10-28	2023-09-25
2014-9457-BOL	No	nat-cli-dro-dro	Natural	Climatological	Drought	Drought			BOL	Bolivia (Plurinational State of)	Latin America and the Caribbean	Americas	Santa Cruz province			No	No	Yes			Km2				2014	10		2014	10				51180		51180							77.6944	[{"adm1_code":40449,"adm1_name":"Santa Cruz"}]	2014-11-10	2023-09-25
2014-9469-JAM	No	nat-cli-dro-dro	Natural	Climatological	Drought	Drought			JAM	Jamaica	Latin America and the Caribbean	Americas	Saint Thomas, Saint Mary, Portland, Clarendon, Manchester, Saint Catherine, Saint Andrew And Kingston provinces		Food shortage	No	No	No			Km2				2014	1		2014	11				91545		91545					10000	12871	77.6944	[{"adm1_code":1636,"adm1_name":"Clarendon"},{"adm1_code":1638,"adm1_name":"Manchester"},{"adm1_code":1639,"adm1_name":"Portland"},{"adm1_code":1640,"adm1_name":"Saint Andrew And Kingston"},{"adm1_code":1642,"adm1_name":"Saint Catherine"},{"adm1_code":1645,"adm1_name":"Saint Mary"},{"adm1_code":1646,"adm1_name":"Saint Thomas"}]	2014-12-11	2023-09-25
2014-9533-MDG	No	nat-cli-dro-dro	Natural	Climatological	Drought	Drought			MDG	Madagascar	Sub-Saharan Africa	Africa	Androy, Anosy provinces; Atsimo Andrefana, Menabe provinces (South-West regions)		Famine	No	No	No			Km2				2014	11		2015	2				20000		20000							77.6944	[{"adm1_code":41754,"adm1_name":"Androy"},{"adm1_code":41755,"adm1_name":"Anosy"},{"adm1_code":41756,"adm1_name":"Atsimo Andrefana"},{"adm1_code":41767,"adm1_name":"Menabe"}]	2015-03-05	2023-09-25
2014-9573-SEN	No	nat-cli-dro-dro	Natural	Climatological	Drought	Drought			SEN	Senegal	Sub-Saharan Africa	Africa	Kanel district (Matam province), Podor district (Saint Louis province), Fatick district (Fatick province), Goudomp district (Sedhiou province)	Rainfall deficit	Food shortage	Yes	No	No			Km2				2014	9		2015	4				639702		639702							77.6944	[{"adm2_code":1394,"adm2_name":"Goudomp"},{"adm2_code":25325,"adm2_name":"Fatick"},{"adm2_code":47593,"adm2_name":"Kanel"},{"adm2_code":47598,"adm2_name":"Podor"}]	2015-06-01	2023-09-25
2014-9580-CRI	No	nat-cli-dro-dro	Natural	Climatological	Drought	Drought	GLIDE:DR-2015-000114		CRI	Costa Rica	Latin America and the Caribbean	Americas	Alajuela, Cartago, Guanacaste, Heredia, Limon, Puntarenas, San Jose provinces			No	No	No			Km2				2015	8		2015	8													77.7866	[{"adm1_code":981,"adm1_name":"Alajuela"},{"adm1_code":982,"adm1_name":"Cartago"},{"adm1_code":983,"adm1_name":"Guanacaste"},{"adm1_code":984,"adm1_name":"Heredia"},{"adm1_code":985,"adm1_name":"Limon"},{"adm1_code":986,"adm1_name":"Puntarenas"},{"adm1_code":987,"adm1_name":"San Jose"}]	2015-08-03	2023-09-25
2014-9580-NIC	No	nat-cli-dro-dro	Natural	Climatological	Drought	Drought	GLIDE:DR-2015-000114		NIC	Nicaragua	Latin America and the Caribbean	Americas	Atlantico Norte, Atlantico Sur, Boaco, Carazo, Chinandega, Chontales, Esteli, Granada, Jinotega, Leon, Madriz, Managua, Masaya, Matagalpa, Nueva Segovia, Rio San Juan, Rivas provinces			No	No	No			Km2				2014	8		2015	2				460000		460000							77.6944	[{"adm1_code":2185,"adm1_name":"Atlantico Norte"},{"adm1_code":2186,"adm1_name":"Atlantico Sur"},{"adm1_code":2187,"adm1_name":"Boaco"},{"adm1_code":2188,"adm1_name":"Carazo"},{"adm1_code":2189,"adm1_name":"Chinandega"},{"adm1_code":2190,"adm1_name":"Chontales"},{"adm1_code":2191,"adm1_name":"Esteli"},{"adm1_code":2192,"adm1_name":"Granada"},{"adm1_code":2193,"adm1_name":"Jinotega"},{"adm1_code":…	2015-02-27	2023-09-25
2014-9580-SLV	No	nat-cli-dro-dro	Natural	Climatological	Drought	Drought	GLIDE:DR-2015-000114		SLV	El Salvador	Latin America and the Caribbean	Americas	La Union, San Miguel, Morazan, Usulutan, Ahuachapan, Sonsonate, Santa Ana, Chalatenango provinces			No	No	No			Km2				2015	4		2016	12				700000		700000					100000	128557	77.7866	[{"adm1_code":1184,"adm1_name":"Ahuachapan"},{"adm1_code":1186,"adm1_name":"Chalatenango"},{"adm1_code":1190,"adm1_name":"La Union"},{"adm1_code":1191,"adm1_name":"Morazan"},{"adm1_code":1192,"adm1_name":"San Miguel"},{"adm1_code":1195,"adm1_name":"Santa Ana"},{"adm1_code":1196,"adm1_name":"Sonsonate"},{"adm1_code":1197,"adm1_name":"Usulutan"}]	2016-04-26	2023-09-25
2015-9166-NER	No	nat-cli-dro-dro	Natural	Climatological	Drought	Drought			NER	Niger	Sub-Saharan Africa	Africa	NO DATA: all provinces have been selected: Maradi, Niamey, Tahoua, Tillaberi, Zinder provinces	Climatic conditions and refugees	Food shortage	No	No	No			Km2				2015	4		2017	3				2588128		2588128							77.7866	[{"adm1_code":2205,"adm1_name":"Maradi"},{"adm1_code":2206,"adm1_name":"Niamey"},{"adm1_code":2207,"adm1_name":"Tahoua"},{"adm1_code":2208,"adm1_name":"Tillaberi"},{"adm1_code":2209,"adm1_name":"Zinder"}]	2015-05-20	2023-09-25
2015-9210-USA	No	nat-cli-dro-dro	Natural	Climatological	Drought	Drought			USA	United States of America	Northern America	Americas	California, Nevada, Oregon, Washington, Idaho, Montana, Utah, Arizona provinces			No	No	No			Km2				2015	1		2015	12											4500000	5785060	77.7866	[{"adm1_code":3216,"adm1_name":"Arizona"},{"adm1_code":3218,"adm1_name":"California"},{"adm1_code":3226,"adm1_name":"Idaho"},{"adm1_code":3240,"adm1_name":"Montana"},{"adm1_code":3242,"adm1_name":"Nevada"},{"adm1_code":3251,"adm1_name":"Oregon"},{"adm1_code":3258,"adm1_name":"Utah"},{"adm1_code":3261,"adm1_name":"Washington"}]	2015-06-05	2023-09-25
2015-9257-PRK	No	nat-cli-dro-dro	Natural	Climatological	Drought	Drought			PRK	Democratic People's Republic of Korea	Eastern Asia	Asia	Hwanghae-namdo, Hwanghae-bukto, Hamyong-namdo, P'yongan-bukto, P'yongan-namdo, P'yongyang-si provinces	Lack of rain		No	No	No			Km2				2015	6		2015	7				18000000		18000000							77.7866	[{"adm1_code":1059,"adm1_name":"Hwanghae-bukto"},{"adm1_code":1060,"adm1_name":"P'yongan-bukto"},{"adm1_code":1061,"adm1_name":"P'yongyang-si"},{"adm1_code":1062,"adm1_name":"Hamgyong-namdo"},{"adm1_code":1063,"adm1_name":"Hwanghae-namdo"},{"adm1_code":1064,"adm1_name":"P'yongan-namdo"}]	2015-07-22	2023-09-25
2015-9307-BWA	No	nat-cli-dro-dro	Natural	Climatological	Drought	Drought			BWA	Botswana	Sub-Saharan Africa	Africa	All country	Lack of rain, heat wave		No	No	Yes			Km2				2015	7		2015	12											44000	56565	77.7866	[{"adm1_code":654,"adm1_name":"Central"},{"adm1_code":655,"adm1_name":"Chobe"},{"adm1_code":656,"adm1_name":"Ghanzi"},{"adm1_code":657,"adm1_name":"Kgalagadi"},{"adm1_code":658,"adm1_name":"Kgatleng"},{"adm1_code":659,"adm1_name":"Kweneng"},{"adm1_code":660,"adm1_name":"Ngamiland"},{"adm1_code":661,"adm1_name":"North East"},{"adm1_code":662,"adm1_name":"South-East"},{"adm1_code":663,"adm1_name":"…	2015-08-03	2023-09-25
2015-9328-CHN	No	nat-cli-dro-dro	Natural	Climatological	Drought	Drought			CHN	China	Eastern Asia	Asia	Hebei Sheng, Shanxi Sheng, Nei Mongol Zizhiqu, Liaoning Sheng, Jilin Sheng, Heilongjiang Sheng, Shandong Sheng, Yunnan Sheng, Shaanxi, Ningxia Huizu Zizhiqu provinces			No	No	No			Km2				2015	5		2015	10									444000	570793	2464000	3167642	77.7866	[{"adm1_code":907,"adm1_name":"Hebei Sheng"},{"adm1_code":908,"adm1_name":"Heilongjiang Sheng"},{"adm1_code":915,"adm1_name":"Jilin Sheng"},{"adm1_code":916,"adm1_name":"Liaoning Sheng"},{"adm1_code":917,"adm1_name":"Nei Mongol Zizhiqu"},{"adm1_code":918,"adm1_name":"Ningxia Huizu Zizhiqu"},{"adm1_code":920,"adm1_name":"Shaanxi Sheng"},{"adm1_code":921,"adm1_name":"Shandong Sheng"},{"adm1_code":9…	2015-08-07	2023-09-25
2015-9353-PAN	No	nat-cli-dro-dro	Natural	Climatological	Drought	Drought	GLIDE:DR-2015-000150		PAN	Panama	Latin America and the Caribbean	Americas	Coclé, Colón, Kuna Yala, Herrera, Los Santos, Panamá, Bocas del Toro, Chiriquí, Darién, Emberá, Ngöbe Buglé, Veraguas provinces	El Nino		No	No	Yes			Km2				2015	8		2015	8													77.7866	[{"adm1_code":2282,"adm1_name":"Coclé"},{"adm1_code":2283,"adm1_name":"Colón"},{"adm1_code":2284,"adm1_name":"Kuna Yala"},{"adm1_code":2286,"adm1_name":"Herrera"},{"adm1_code":2287,"adm1_name":"Los Santos"},{"adm1_code":2288,"adm1_name":"Panamá"},{"adm1_code":93668,"adm1_name":"Bocas del Toro"},{"adm1_code":93669,"adm1_name":"Chiriquí"},{"adm1_code":93670,"adm1_name":"Darién"},{"adm1_code":93671,…	2015-08-12	2023-09-25
2015-9364-PHL	No	nat-cli-dro-dro	Natural	Climatological	Drought	Drought			PHL	Philippines	South-eastern Asia	Asia	Isabela district (Region II (Cagayan Valley), Region XIII (Caraga), Autonomous region in Muslim Mindanao (ARMM), Region IX (Zamboanga Peninsula), Region X (Northern Mindanao), Region XI (Davao Region), Region XII (Soccsksargen) provinces (Mindanao Isl.), Region VI (Western Visayas), Region VII (Central Visayas), Region VIII (Eastern Visayas) provinces (Visayas regions)	El Nino		No	No	Yes			Km2				2015	8		2016	4				181687		181687					84399	108501	77.7866	[{"adm1_code":2362,"adm1_name":"Region VI (Western Visayas)"},{"adm1_code":2363,"adm1_name":"Region VII (Central Visayas)"},{"adm1_code":2364,"adm1_name":"Region VIII (Eastern Visayas)"},{"adm1_code":2368,"adm1_name":"Region XIII (Caraga)"},{"adm1_code":67156,"adm1_name":"Autonomous region in Muslim Mindanao (ARMM)"},{"adm1_code":67159,"adm1_name":"Region IX (Zamboanga Peninsula)"},{"adm1_code":6…	2015-08-18	2023-09-25
2015-9372-COL	No	nat-cli-dro-dro	Natural	Climatological	Drought	Drought			COL	Colombia	Latin America and the Caribbean	Americas	Caldas, Tolima, Quindio, Huila, Boyaca, Valle Del Cauca, Santander, Narino, Caqueta, Risaralda, Guajira, Atlantico, Magdalena, Bolivar, Arauca, Casanare provinces	El Nino	Wildfire	No	No	No			Km2				2015	10		2016	2													77.7866	[{"adm1_code":936,"adm1_name":"Arauca"},{"adm1_code":937,"adm1_name":"Atlantico"},{"adm1_code":938,"adm1_name":"Bolivar"},{"adm1_code":939,"adm1_name":"Boyaca"},{"adm1_code":941,"adm1_name":"Caldas"},{"adm1_code":942,"adm1_name":"Caqueta"},{"adm1_code":943,"adm1_name":"Casanare"},{"adm1_code":950,"adm1_name":"Guajira"},{"adm1_code":952,"adm1_name":"Huila"},{"adm1_code":953,"adm1_name":"Magdalena"…	2015-12-16	2023-09-25
2015-9372-CUB	No	nat-cli-dro-dro	Natural	Climatological	Drought	Drought			CUB	Cuba	Latin America and the Caribbean	Americas	Camaguey, Ciego De Avila, Cienfuegos, Ciudad De La Habana, Granma, Guantanamo, Holguin, Isla De La Juventud, La Habana, Las Tunas, Matanzas, Pinar Del Rio, Sancti Spiritus, Santiago De Cuba, Villa Clara provinces	El Nino; long uninterrupted drought combined with heavy unseasonable rains		No	No	No			Km2				2015	5		2015	6				100000		100000							77.7866	[{"adm1_code":1009,"adm1_name":"Camaguey"},{"adm1_code":1010,"adm1_name":"Ciego De Avila"},{"adm1_code":1011,"adm1_name":"Cienfuegos"},{"adm1_code":1012,"adm1_name":"Ciudad De La Habana"},{"adm1_code":1013,"adm1_name":"Granma"},{"adm1_code":1014,"adm1_name":"Guantanamo"},{"adm1_code":1015,"adm1_name":"Holguin"},{"adm1_code":1016,"adm1_name":"Isla De La Juventud"},{"adm1_code":1017,"adm1_name":"La…	2015-08-24	2023-09-25
2015-9373-SDN	No	nat-cli-dro-dro	Natural	Climatological	Drought	Drought			SDN	Sudan	Northern Africa	Africa	Southern Kordofan, Blue Nile provinces		Food shortage	No	No	No			Km2				2015	8		2015	8				800000		800000							77.7866	[{"adm1_code":2749,"adm1_name":"Blue Nile"},{"adm1_code":4150,"adm1_name":"Southern Kordofan"}]	2015-08-24	2023-09-25
2015-9410-PNG	No	nat-cli-dro-dro	Natural	Climatological	Drought	Drought	GLIDE:CW-2015-000116-PNG		PNG	Papua New Guinea	Melanesia	Oceania	Kandep district (Enga province), Sirunki city (Lagaip district, Enga province), Mendi, Ialibu, Pangia districts (Southern Highlands province), Tambul district (Western Highlands province), Menyamya district (Morobe province); Kundiawa, Gembogl, Sinasina(-Yongomugl), Gumine, Chuave, Kerowagi, Karimui (-Nomane) districts (Chimbu province), Henganofi, Goroka (Unggai-Bena) districts (Eastern Highland…	El nino	Cold wave	Yes	No	No			Km2				2015	5		2015	10		24		2520000		2520000					60000	77134	77.7866	[{"adm1_code":2298,"adm1_name":"Manus"},{"adm2_code":37471,"adm2_name":"Goilala"},{"adm2_code":37475,"adm2_name":"Chuave"},{"adm2_code":37476,"adm2_name":"Gembogl"},{"adm2_code":37477,"adm2_name":"Gumine"},{"adm2_code":37478,"adm2_name":"Karimui"},{"adm2_code":37479,"adm2_name":"Kerowagi"},{"adm2_code":37480,"adm2_name":"Kundiawa"},{"adm2_code":37481,"adm2_name":"Sinasina"},{"adm2_code":37482,"ad…	2015-09-09	2023-09-25
2015-9411-IDN	No	nat-cli-dro-dro	Natural	Climatological	Drought	Drought			IDN	Indonesia	South-eastern Asia	Asia	Lani Jaya (Jayawijaya district, Papua province), Puncakjaya district (Papua province)		Cold wave|Food shortage	No	No	No			Km2				2015	7		2015	7		11											77.7866	[{"adm2_code":73686,"adm2_name":"Jayawijaya"},{"adm2_code":73832,"adm2_name":"Puncakjaya"}]	2015-09-10	2023-09-25
2015-9444-MWI	No	nat-cli-dro-dro	Natural	Climatological	Drought	Drought	GLIDE:DR-2015-000136		MWI	Malawi	Sub-Saharan Africa	Africa	23-25 districts affected (almost all the country): All provinces have been selected	Late and erratic start to the rainy season, El Nino	Food shortage	Yes	No	Yes			Km2				2015	10		2017	12				6700000		6700000							77.7866	[{"adm1_code":1888,"adm1_name":"Central Region"},{"adm1_code":1889,"adm1_name":"Northern Region"},{"adm1_code":1890,"adm1_name":"Southern Region"},{"adm1_code":65268,"adm1_name":"Area under National Administration"}]	2015-10-07	2023-09-25
2015-9483-FJI	No	nat-cli-dro-dro	Natural	Climatological	Drought	Drought			FJI	Fiji	Melanesia	Oceania	NO DATA: all country selected	El NIno		No	No	No			Km2				2015	9		2015	10				67000		67000							77.7866	[{"adm1_code":40187,"adm1_name":"Central"},{"adm1_code":40188,"adm1_name":"Eastern"},{"adm1_code":40189,"adm1_name":"Northern"},{"adm1_code":40190,"adm1_name":"Western"}]	2015-10-28	2023-09-25
2015-9483-SLB	No	nat-cli-dro-dro	Natural	Climatological	Drought	Drought			SLB	Solomon Islands	Melanesia	Oceania	Bellona, Rennell, Makira			No	No	No			Km2				2015			2015	12													77.7866	[{"adm1_code":2687,"adm1_name":"Administrative unit not available"}]	2015-12-17	2023-09-25
2015-9483-TON	No	nat-cli-dro-dro	Natural	Climatological	Drought	Drought			TON	Tonga	Polynesia	Oceania	Vava'u, Ha'apai, Tongatapu, Niuafo'ou, Niuatoputapu	El NIno		No	No	Yes			Km2				2015	8		2015	12													77.7866	[{"adm1_code":2976,"adm1_name":"Administrative unit not available"}]	2015-10-28	2023-09-25
2015-9483-WSM	No	nat-cli-dro-dro	Natural	Climatological	Drought	Drought			WSM	Samoa	Polynesia	Oceania	Upolu Isl., Savaii Isl.			No	No	Yes			Km2				2015	6		2015	12													77.7866	[{"adm1_code":2618,"adm1_name":"Administrative unit not available"}]	2015-12-17	2023-09-25
2015-9496-MHL	No	nat-cli-dro-dro	Natural	Climatological	Drought	Drought			MHL	Marshall Islands	Micronesia	Oceania		El NIno, low precipitation		Yes	No	Yes			Km2				2015			2016	5				21000		21000					4900	6299	77.7866	[{"adm2_code":19488,"adm2_name":"Administrative unit not available"}]	2016-12-15	2023-09-25
2015-9500-ZAF	No	nat-cli-dro-dro	Natural	Climatological	Drought	Drought			ZAF	South Africa	Sub-Saharan Africa	Africa	KwaZulu-Natal, Free state, Limpopo, Mpumalanga, North-West, Western Cape provinces	El Nino	Heat wave	No	No	Yes			Km2				2015	1		2017	5				2700000		2700000					250000	321392	77.7866	[{"adm1_code":2707,"adm1_name":"Free State"},{"adm1_code":2714,"adm1_name":"Western Cape"},{"adm1_code":77311,"adm1_name":"KwaZulu-Natal"},{"adm1_code":77312,"adm1_name":"Limpopo"},{"adm1_code":77313,"adm1_name":"Mpumalanga"},{"adm1_code":77314,"adm1_name":"North West"}]	2015-11-16	2023-09-25
2015-9505-NAM	No	nat-cli-dro-dro	Natural	Climatological	Drought	Drought	GLIDE:DR-2015-000130		NAM	Namibia	Sub-Saharan Africa	Africa	Erongo, Hardap, Karas, Kunene provinces (South and Western part of the country)	Low rainfall	Food shortage	No	No	No			Km2				2015	1		2016	3				580000		580000					60000	77134	77.7866	[{"adm1_code":2138,"adm1_name":"Erongo"},{"adm1_code":2139,"adm1_name":"Hardap"},{"adm1_code":2140,"adm1_name":"Karas"},{"adm1_code":2143,"adm1_name":"Kunene"}]	2015-11-16	2023-09-25
2015-9545-ETH	No	nat-cli-dro-dro	Natural	Climatological	Drought	Drought	GLIDE:DR-2015-000109		ETH	Ethiopia	Sub-Saharan Africa	Africa	Somali, Afar, Oromia, Amhara, Nations du Sud provinces	El Nino	Famine	No	No	No			Km2				2015	9		2017	4				10200000		10200000					1400000	1799797	77.7866	[{"adm1_code":1228,"adm1_name":"Afar"},{"adm1_code":47679,"adm1_name":"Somali"}]	2015-12-16	2023-09-25
2015-9574-THA	No	nat-cli-dro-dro	Natural	Climatological	Drought	Drought			THA	Thailand	South-eastern Asia	Asia	42 provinces. 28 provinces in the North and Northeast			No	No	No			Km2				2015	1		2017	5											3300000	4242378	77.7866	[{"adm1_code":2851,"adm1_name":"Amnat Charoen"},{"adm1_code":2852,"adm1_name":"Ang Thong"},{"adm1_code":2853,"adm1_name":"Bangkok"},{"adm1_code":2854,"adm1_name":"Buriram"},{"adm1_code":2855,"adm1_name":"Chachoengsao"},{"adm1_code":2856,"adm1_name":"Chainat"},{"adm1_code":2857,"adm1_name":"Chaiyaphum"},{"adm1_code":2858,"adm1_name":"Chanthaburi"},{"adm1_code":2859,"adm1_name":"Chiang Mai"},{"adm1…	2016-01-22	2024-04-09
2015-9575-GMB	No	nat-cli-dro-dro	Natural	Climatological	Drought	Drought	GLIDE:OT-2015-000021		GMB	Gambia	Sub-Saharan Africa	Africa	NO DATA: all country selected: Central River, North Bank (mainly?), Kanifing Municipal Council, Lower River, Upper River, West Coast provinces		Food shortage	No	No	No			Km2				2015	1		2015	12				63100		63100							77.7866	[{"adm1_code":1285,"adm1_name":"Central River"},{"adm1_code":1287,"adm1_name":"Lower River"},{"adm1_code":1288,"adm1_name":"North Bank"},{"adm1_code":1289,"adm1_name":"Upper River"},{"adm1_code":1290,"adm1_name":"West Coast"},{"adm1_code":112869,"adm1_name":"Kanifing Municipal Council"}]	2016-01-21	2023-09-25
2015-9616-SOM	No	nat-cli-dro-dro	Natural	Climatological	Drought	Drought	GLIDE:DR-2015-000134		SOM	Somalia	Sub-Saharan Africa	Africa	Sanaag, Sool, Togdheer, Woqooyi Galbeed, Awdal provinces (Somaliland region), Bari, Nugaal provinces (Puntland region); Karkaar	El Nino	Food shortage	Yes	No	Yes			Km2				2015	8		2017	5				6700000		6700000							77.7866	[{"adm1_code":2688,"adm1_name":"Awdal"},{"adm1_code":2690,"adm1_name":"Bari"},{"adm1_code":2701,"adm1_name":"Nugaal"},{"adm1_code":2702,"adm1_name":"Sanaag"},{"adm1_code":2703,"adm1_name":"Sool"},{"adm1_code":2704,"adm1_name":"Togdheer"},{"adm1_code":2705,"adm1_name":"Woqooyi Galbeed"}]	2016-03-15	2023-09-25
2015-9617-VNM	No	nat-cli-dro-dro	Natural	Climatological	Drought	Drought	GLIDE:DR-2015-000180		VNM	Viet Nam	South-eastern Asia	Asia	An Giang, Ba Ria-Vung Tau, Ben Tre, Binh Dinh, Binh Duong, Binh Phuoc, Binh Thuan, Can Tho city, Dak Lak, Dak Nong, Dong Nai, Dong Thap, Gia Lai, Hau Giang, Ho Chi Minh City, Khanh Hoa, Kon Tum, Lam Dong, Long An, Ninh Thuan, Phu Yen, Quang Nam, Quang Ngai, Soc Trang, Tay Ninh, Tien Giang, Tra Vinh, Vinh Long provinces	Lack of rainfall, El NIno		Yes	No	No			Km2				2015	12		2017	2				1750000		1750000					6750000	8677591	77.7866	[{"adm1_code":3326,"adm1_name":"An Giang"},{"adm1_code":3327,"adm1_name":"Ba Ria-Vung Tau"},{"adm1_code":3332,"adm1_name":"Ben Tre"},{"adm1_code":3333,"adm1_name":"Binh Dinh"},{"adm1_code":3334,"adm1_name":"Binh Duong"},{"adm1_code":3335,"adm1_name":"Binh Phuoc"},{"adm1_code":3336,"adm1_name":"Binh Thuan"},{"adm1_code":3342,"adm1_name":"Dong Nai"},{"adm1_code":3343,"adm1_name":"Dong Thap"},{"adm1…	2016-03-15	2023-09-25
2015-9618-IND	No	nat-cli-dro-dro	Natural	Climatological	Drought	Drought			IND	India	Southern Asia	Asia	Tamil Nadu, Rajasthan, Jharkhand, Assam, Andhra Pradesh, Himachal Pradesh, Nagaland; Maharashtra, Bihar, Madhya Pradesh, Chhattisgarh, Telangana, Jharkand, Odisha states	Erratic rainfall		No	No	No			Km2				2015	1		2016	12				330000000		330000000			400000	514228	3000000	3856707	77.7866	[{"adm1_code":1485,"adm1_name":"Andhra Pradesh"},{"adm1_code":1487,"adm1_name":"Assam"},{"adm1_code":1493,"adm1_name":"Himachal Pradesh"},{"adm1_code":1498,"adm1_name":"Maharashtra"},{"adm1_code":1503,"adm1_name":"Nagaland"},{"adm1_code":1504,"adm1_name":"Orissa"},{"adm1_code":1506,"adm1_name":"Rajasthan"},{"adm1_code":1508,"adm1_name":"Tamil Nadu"},{"adm1_code":70073,"adm1_name":"Bihar"},{"adm1_…	2016-04-11	2024-04-09
2015-9621-PLW	No	nat-cli-dro-dro	Natural	Climatological	Drought	Drought			PLW	Palau	Micronesia	Oceania		Poor rainfall, El Nino		Yes	No	No			Km2				2015	10		2016	3				14200		14200							77.7866		2021-08-04	2023-09-25
2016-9020-MDG	No	nat-cli-dro-dro	Natural	Climatological	Drought	Drought			MDG	Madagascar	Sub-Saharan Africa	Africa	Ambovombe-Androy, Bekily, Beloha, Tsihombe districts (Androy province), Amboasary-Atsimo, Taolagnaro districts (Anosy province), Ampanihy Ouest, Betioky Atsimo districts (Atsimo Andrefana province)	El Nino	Food shortage	Yes	No	Yes			Km2				2016	1		2017	1				1140000		1140000							78.7679	[{"adm2_code":154531,"adm2_name":"Ambovombe-Androy"},{"adm2_code":154532,"adm2_name":"Bekily"},{"adm2_code":154533,"adm2_name":"Beloha"},{"adm2_code":154534,"adm2_name":"Tsihombe"},{"adm2_code":154535,"adm2_name":"Amboasary-Atsimo"},{"adm2_code":154537,"adm2_name":"Taolagnaro"},{"adm2_code":154538,"adm2_name":"Ampanihy Ouest"},{"adm2_code":154542,"adm2_name":"Betioky Atsimo"}]	2016-02-03	2023-09-25
2016-9050-LSO	No	nat-cli-dro-dro	Natural	Climatological	Drought	Drought	GLIDE:OT-2016-000005		LSO	Lesotho	Sub-Saharan Africa	Africa	Qacha’s Nek, Mokhotlong, Thaba Tseka, Quthing, Mafeteng, Butha Bothe, Berea, Leribe, Maseru, Mohale's Hoek provinces	Lack of rains, El NIno	Food shortage	Yes	No	No			Km2				2016	2		2017	1				709000		709000							78.7679	[{"adm1_code":1803,"adm1_name":"Berea"},{"adm1_code":1804,"adm1_name":"Butha Buthe"},{"adm1_code":1805,"adm1_name":"Leribe"},{"adm1_code":1806,"adm1_name":"Mafeteng"},{"adm1_code":1807,"adm1_name":"Maseru"},{"adm1_code":1808,"adm1_name":"Mohale's Hoek"},{"adm1_code":1809,"adm1_name":"Mokhotlong"},{"adm1_code":1810,"adm1_name":"Qacha's Nek"},{"adm1_code":1811,"adm1_name":"Quthing"},{"adm1_code":18…	2016-02-29	2023-09-25
2016-9052-HTI	No	nat-cli-dro-dro	Natural	Climatological	Drought	Drought			HTI	Haiti	Latin America and the Caribbean	Americas	Corail, Anse-D'Ainsault, Jeremie districts (Grande Anse province), Chardonnieres, Coteaux, Aquin, Cayes, Port-Salut districts (Sud province), Anse-A-Veau, Baraderes, Miragoane districts (Nippes province), Gonave, Leogane districts (Ouest province), Belle Anse, Jacmel, Bainet districts (Sud Est province), Croix-des-Bouquets district (Ouest province), Lascahobas, Ceca La Source, Hinche, Mirebalais …	Lack of rain	Food shortage	No	No	No			Km2				2016	1		2017	2				3600000		3600000					84000	106642	78.7679	[{"adm2_code":17167,"adm2_name":"Gros Morne"},{"adm2_code":17168,"adm2_name":"Gonaives"},{"adm2_code":17169,"adm2_name":"Marmelade"},{"adm2_code":17170,"adm2_name":"Saint-Marc"},{"adm2_code":17171,"adm2_name":"Ceca La Source"},{"adm2_code":17172,"adm2_name":"Hinche"},{"adm2_code":17173,"adm2_name":"Lascahobas"},{"adm2_code":17174,"adm2_name":"Mirebalais"},{"adm2_code":17188,"adm2_name":"Grande Ri…	2016-03-15	2023-09-25
2016-9065-SSD	No	nat-cli-dro-dro	Natural	Climatological	Drought	Drought			SSD	South Sudan	Sub-Saharan Africa	Africa	Western Bahr El Ghazal, Northern Bahr El Ghazal, Warab, Unity, Upper Nile, Jonglei, El Buheyrat, Western Equatoria, Central Equatoria, Eastern Equatoria provinces		Famine	No	No	No			Km2				2016	2		2016	11				3600000		3600000							78.7679	[{"adm1_code":2746,"adm1_name":"El Buheyrat"},{"adm1_code":2747,"adm1_name":"Unity"},{"adm1_code":2748,"adm1_name":"Central Equatoria"},{"adm1_code":2750,"adm1_name":"Eastern Equatoria"},{"adm1_code":2751,"adm1_name":"Jonglei"},{"adm1_code":2754,"adm1_name":"Northern Bahr El Ghazal"},{"adm1_code":2765,"adm1_name":"Warab"},{"adm1_code":2766,"adm1_name":"Western Bahr El Ghazal"},{"adm1_code":2768,"…	2016-03-15	2023-09-25
2016-9119-TLS	No	nat-cli-dro-dro	Natural	Climatological	Drought	Drought			TLS	Timor-Leste	South-eastern Asia	Asia	Baucau, Lautem, Viqueque provinces	Lack of rain, El Nino		No	No	No			Km2				2016	4		2016	4				120000		120000							78.7679	[{"adm1_code":2959,"adm1_name":"Baucau"},{"adm1_code":2964,"adm1_name":"Lautem"},{"adm1_code":2969,"adm1_name":"Viqueque"}]	2016-04-20	2023-09-25
2016-9122-MOZ	No	nat-cli-dro-dro	Natural	Climatological	Drought	Drought			MOZ	Mozambique	Sub-Saharan Africa	Africa	Magude, Manhiça districts (Maputo province), Massingir, Chibuto, Mabalane districts (Gaza province), Funhaloro, Panda, Govuro districts (Inhambane province), Sofala, Tete		Food shortage	Yes	No	No			Km2				2016	1		2017	1				2300000		2300000							78.7679	[{"adm1_code":2120,"adm1_name":"Sofala"},{"adm1_code":2121,"adm1_name":"Tete"},{"adm2_code":21850,"adm2_name":"Chibuto"},{"adm2_code":21855,"adm2_name":"Mabalane"},{"adm2_code":21858,"adm2_name":"Massingir"},{"adm2_code":21860,"adm2_name":"Funhalouro"},{"adm2_code":21861,"adm2_name":"Govuro"},{"adm2_code":21869,"adm2_name":"Panda"},{"adm2_code":21883,"adm2_name":"Magude"},{"adm2_code":41375,"adm2…	2016-04-29	2023-09-25
2016-9225-KHM	No	nat-cli-dro-dro	Natural	Climatological	Drought	Drought			KHM	Cambodia	South-eastern Asia	Asia	Banteay Meanchey, Battambang, Pursat, Kampong Speu provinces		Water shortage	No	No	No			Km2				2016	5		2016	5				2500000		2500000							78.7679	[{"adm1_code":791,"adm1_name":"Banteay Meanchey"},{"adm1_code":792,"adm1_name":"Battambang"},{"adm1_code":795,"adm1_name":"Kampong Speu"},{"adm1_code":809,"adm1_name":"Pursat"}]	2016-07-07	2023-09-25
2016-9249-PRY	No	nat-cli-dro-dro	Natural	Climatological	Drought	Drought			PRY	Paraguay	Latin America and the Caribbean	Americas	Alto Paraguay, Boqueron, Presidente Hayes provinces (Chaco region)			No	No	No			Km2				2016	7		2016	8													78.7679	[{"adm1_code":2311,"adm1_name":"Alto Paraguay"},{"adm1_code":2314,"adm1_name":"Boqueron"},{"adm1_code":2326,"adm1_name":"Presidente Hayes"}]	2016-08-01	2023-09-25
2016-9291-SWZ	No	nat-cli-dro-dro	Natural	Climatological	Drought	Drought			SWZ	Eswatini	Sub-Saharan Africa	Africa	Whole country: Hhohho, Lubombo, Manzini, Shiselweni provinces	El Nino		Yes	No	Yes			Km2				2016	2		2017	2				492000		492000							78.7679	[{"adm1_code":2782,"adm1_name":"Hhohho"},{"adm1_code":2783,"adm1_name":"Lubombo"},{"adm1_code":2784,"adm1_name":"Manzini"},{"adm1_code":2785,"adm1_name":"Shiselweni"}]	2016-08-16	2023-09-25
2016-9369-CHN	No	nat-cli-dro-dro	Natural	Climatological	Drought	Drought			CHN	China	Eastern Asia	Asia	Jilin Sheng, Heilongjiang Sheng, Shanxi Sheng, Gansu Sheng, Ningxia Huizu Zizhiqu, Nei Mongol Zizhiqu provinces	High temperature and reduced rainfall	Heat wave|Water shortage	No	No	No			Km2				2016	6		2016	8				10000000		10000000			1100000	1396508	3000000	3808657	78.7679	[{"adm1_code":902,"adm1_name":"Gansu Sheng"},{"adm1_code":908,"adm1_name":"Heilongjiang Sheng"},{"adm1_code":915,"adm1_name":"Jilin Sheng"},{"adm1_code":917,"adm1_name":"Nei Mongol Zizhiqu"},{"adm1_code":918,"adm1_name":"Ningxia Huizu Zizhiqu"},{"adm1_code":923,"adm1_name":"Shanxi Sheng"}]	2016-11-17	2023-09-25
2016-9435-BOL	No	nat-cli-dro-dro	Natural	Climatological	Drought	Drought			BOL	Bolivia (Plurinational State of)	Latin America and the Caribbean	Americas	Oruro, Cochabamba, Beni provinces		Water shortage	No	No	Yes			Km2				2016	3		2016	12				665000		665000					450000	571299	78.7679	[{"adm1_code":40443,"adm1_name":"Beni"},{"adm1_code":40445,"adm1_name":"Cochabamba"},{"adm1_code":40447,"adm1_name":"Oruro"}]	2016-11-23	2023-09-25
2016-9452-KEN	No	nat-cli-dro-dro	Natural	Climatological	Drought	Drought	GLIDE:DR-2016-000118		KEN	Kenya	Sub-Saharan Africa	Africa	Kilifi, Kwale, Tana River, Taita Taveta districts (Coast province), Wajir, Mandera districts (North Eastern province), Marsabit, Makueni, Kitui districts (Eastern province), Samburu district (Rift Valley province), Lamu, Baringo, West Poko, Garissa, Tana river, Isiolo, Laikipia, Turkana, Taita Tavetan Makueni, Narok, Embu (Mbeere), Meru, Tharaka Nithi, Nyeri	Poor performance in the long-rain time period	Food shortage	No	No	Yes			Km2				2016	6		2018	1				3400000		3400000							78.7679		2016-11-28	2023-09-25
2016-9495-FSM	No	nat-cli-dro-dro	Natural	Climatological	Drought	Drought			FSM	Micronesia (Federated States of)	Micronesia	Oceania	Yap, Chuuk regions			No	No	Yes			Km2				2016			2016	5				100000		100000							78.7679	[{"adm2_code":21438,"adm2_name":"Administrative unit not available"}]	2016-12-15	2023-09-25
2016-9529-LKA	No	nat-cli-dro-dro	Natural	Climatological	Drought	Drought			LKA	Sri Lanka	Southern Asia	Asia	Batticaloa District (Eastern province)			No	No	No			Km2				2016	10		2017	5				900000		900000					20000	25391	78.7679		2017-01-23	2023-09-25
2017-9088-ZWE	No	nat-cli-dro-dro	Natural	Climatological	Drought	Drought			ZWE	Zimbabwe	Sub-Saharan Africa	Africa		Erratic rainfall and prolonged drought conditions exacerbated by El Niño disrupted the 2015/2016	Famine	Yes	No	No			Km2				2017	2		2020	3				6900000		6900000							80.4458		2019-03-06	2023-09-25
2017-9206-CHN	No	nat-cli-dro-dro	Natural	Climatological	Drought	Drought			CHN	China	Eastern Asia	Asia	Northeast China, North China Plain, Inner Mongolia, Hebei, Liaoning	Lack of rain, dry conditions.		No	No	Yes			Km2				2017	4		2017	6				2000000		2000000					122000	151655	80.4458	[{"adm1_code":899,"adm1_name":"Beijing Shi"},{"adm1_code":907,"adm1_name":"Hebei Sheng"},{"adm1_code":908,"adm1_name":"Heilongjiang Sheng"},{"adm1_code":915,"adm1_name":"Jilin Sheng"},{"adm1_code":916,"adm1_name":"Liaoning Sheng"},{"adm1_code":917,"adm1_name":"Nei Mongol Zizhiqu"},{"adm1_code":920,"adm1_name":"Shaanxi Sheng"},{"adm1_code":926,"adm1_name":"Tianjin Shi"}]	2017-06-26	2024-04-09
2017-9207-AGO	No	nat-cli-dro-dro	Natural	Climatological	Drought	Drought			AGO	Angola	Sub-Saharan Africa	Africa	Seven provinces in the South (Cunene, Huila, Namibe, Benguela, Cuando Cubango, Cuanza Sul and Huambo)		Food shortage	No	No	No			Km2				2017	5		2017	6				1420000		1420000							80.4458	[{"adm1_code":399,"adm1_name":"Benguela"},{"adm1_code":402,"adm1_name":"Cuando Cubango"},{"adm1_code":403,"adm1_name":"Cuanza Sul"},{"adm1_code":404,"adm1_name":"Cunene"},{"adm1_code":405,"adm1_name":"Huambo"},{"adm1_code":406,"adm1_name":"Huila"},{"adm1_code":413,"adm1_name":"Namibe"}]	2017-06-26	2023-09-25
2017-9208-NER	No	nat-cli-dro-dro	Natural	Climatological	Drought	Drought	GLIDE:OT-2017-000117		NER	Niger	Sub-Saharan Africa	Africa	Bosso, Diffa, Goudoumaria, Mainé-Soroa, N’Gourti, Loga, Ouallam, Bani-Bangou, Abala, Mayahi, Guidan-Roumji, Tanout, Kaniche		Food shortage	No	No	No			Km2				2017	5		2017	6				1131300		1131300							80.4458	[{"adm2_code":22554,"adm2_name":"Diffa"},{"adm2_code":22555,"adm2_name":"Maine-soroa"},{"adm2_code":22556,"adm2_name":"N'guigmi"},{"adm2_code":22561,"adm2_name":"Loga"},{"adm2_code":22564,"adm2_name":"Guidan Roumji"},{"adm2_code":22566,"adm2_name":"Mayahi"},{"adm2_code":22578,"adm2_name":"Filingue"},{"adm2_code":22580,"adm2_name":"Ouallam"},{"adm2_code":22586,"adm2_name":"Matamey"},{"adm2_code":2…	2017-06-26	2023-09-25
2017-9211-ZAF	No	nat-cli-dro-dro	Natural	Climatological	Drought	Drought			ZAF	South Africa	Sub-Saharan Africa	Africa	Cap town, Cap occidental, Cap oriental, North Cap.			No	No	Yes			Km2				2017	5		2018	6											1200000	1491688	80.4458	[{"adm1_code":2714,"adm1_name":"Western Cape"},{"adm1_code":77310,"adm1_name":"Eastern Cape"},{"adm1_code":77315,"adm1_name":"Northern Cape"}]	2017-06-27	2023-09-25
2017-9273-PRK	No	nat-cli-dro-dro	Natural	Climatological	Drought	Drought			PRK	Democratic People's Republic of Korea	Eastern Asia	Asia	South Hwanghae, North Hwanghae Provinces, Nampo city			No	No	No			Km2				2017	1		2017	7													80.4458	[{"adm1_code":1059,"adm1_name":"Hwanghae-bukto"},{"adm1_code":1063,"adm1_name":"Hwanghae-namdo"}]	2017-07-18	2023-09-25
2017-9296-ITA	No	nat-cli-dro-dro	Natural	Climatological	Drought	Drought			ITA	Italy	Southern Europe	Europe	Calabria, Abruzzo, Campania, Tuscany, Emilia Romagna (Parma, Piacenza ), Puglia, Sardinia, Lazio, Lombardy, Umbria, Marche, Sicily, Piemonte (Alessandria, Asti, Cuneo), Trentino-South Tyrol (Val di Non, Val Sun, Valsugana)			No	No	No			Km2				2017	7		2017	7											2300000	2859069	80.4458	[{"adm1_code":1616,"adm1_name":"Abruzzi"},{"adm1_code":1618,"adm1_name":"Calabria"},{"adm1_code":1619,"adm1_name":"Campania"},{"adm1_code":1620,"adm1_name":"Emilia-romagna"},{"adm1_code":1622,"adm1_name":"Lazio"},{"adm1_code":1624,"adm1_name":"Lombardia"},{"adm1_code":1625,"adm1_name":"Marche"},{"adm1_code":1627,"adm1_name":"Piemonte"},{"adm1_code":1628,"adm1_name":"Puglia"},{"adm1_code":1629,"ad…	2017-07-31	2023-09-25
2017-9342-TCD	No	nat-cli-dro-dro	Natural	Climatological	Drought	Drought	GLIDE:OT-2017-000114		TCD	Chad	Sub-Saharan Africa	Africa	Chari Baguimi, Guera, Lac, Kanem, Wadi Fira		Food shortage	No	No	No			Km2				2017	3		2017	5				1886800		1886800							80.4458	[{"adm1_code":870,"adm1_name":"Biltine"},{"adm1_code":873,"adm1_name":"Guera"},{"adm1_code":875,"adm1_name":"Lac"},{"adm1_code":12910,"adm1_name":"Baguirmi"},{"adm1_code":12915,"adm1_name":"Kanem"}]	2017-08-17	2023-09-25
2017-9343-MRT	No	nat-cli-dro-dro	Natural	Climatological	Drought	Drought	GLIDE:OT-2017-000112		MRT	Mauritania	Sub-Saharan Africa	Africa	Brakna, Gorgol, Guidimakha	Lack of rain	Food shortage	Yes	No	No			Km2				2017	4		2017	8				3893774		3893774							80.4458	[{"adm1_code":2006,"adm1_name":"Brakna"},{"adm1_code":2008,"adm1_name":"Gorgol"},{"adm1_code":2009,"adm1_name":"Guidimakha"}]	2017-08-17	2023-09-25
2017-9468-MDG	No	nat-cli-dro-dro	Natural	Climatological	Drought	Drought			MDG	Madagascar	Sub-Saharan Africa	Africa	South, South East		Food shortage	Yes	No	No			Km2				2017	1		2018	12				1260000		1260000							80.4458		2019-01-03	2023-09-25
2017-9550-USA	No	nat-cli-dro-dro	Natural	Climatological	Drought	Drought			USA	United States of America	Northern America	Americas	Upper Midwest, Northern Rockies and parts of the West; North Dakota, South Dakota and Montana.			No	No	No			Km2				2017	3	1	2017	12	31								1900000	2361839	2500000	3107683	80.4458	[{"adm1_code":3216,"adm1_name":"Arizona"},{"adm1_code":3218,"adm1_name":"California"},{"adm1_code":3219,"adm1_name":"Colorado"},{"adm1_code":3226,"adm1_name":"Idaho"},{"adm1_code":3229,"adm1_name":"Iowa"},{"adm1_code":3236,"adm1_name":"Michigan"},{"adm1_code":3237,"adm1_name":"Minnesota"},{"adm1_code":3240,"adm1_name":"Montana"},{"adm1_code":3242,"adm1_name":"Nevada"},{"adm1_code":3243,"adm1_name…	2018-03-05	2023-09-25
2017-9580-CPV	No	nat-cli-dro-dro	Natural	Climatological	Drought	Drought			CPV	Cabo Verde	Sub-Saharan Africa	Africa		Lack if rainfall	Food shortage	Yes	No	No			Km2				2017	11		2017	12				70000		70000							80.4458		2021-08-03	2023-09-25
2018-9075-ARG	No	nat-cli-dro-dro	Natural	Climatological	Drought	Drought			ARG	Argentina	Latin America and the Caribbean	Americas	Buenos Aires, Cordoba, Santa Fe, Pampa, Santiago del Estero provinces			No	No	No			Km2				2018	1		2018	3											3400000	4125679	82.4107	[{"adm1_code":429,"adm1_name":"Buenos Aires"},{"adm1_code":434,"adm1_name":"Cordoba"},{"adm1_code":439,"adm1_name":"La Pampa"},{"adm1_code":449,"adm1_name":"Santa Fe"},{"adm1_code":450,"adm1_name":"Santiago Del Estero"}]	2018-03-01	2023-09-25
2018-9103-URY	No	nat-cli-dro-dro	Natural	Climatological	Drought	Drought	GLIDE:DR-2018-000033		URY	Uruguay	Latin America and the Caribbean	Americas	Tacuarembó, Salto, Durazno, Artigas, Paysandú, Rivera, Río Negro, Florida, Treinta y Tres, Maldonado, Cerro Largo, Colonia	Lack of rain, La Nina		No	No	Yes			Km2				2018	1		2023	1				75000		75000					500000	606718	82.4107	[{"adm1_code":3265,"adm1_name":"Artigas"},{"adm1_code":3267,"adm1_name":"Cerro Largo"},{"adm1_code":3268,"adm1_name":"Colonia"},{"adm1_code":3269,"adm1_name":"Durazno"},{"adm1_code":3271,"adm1_name":"Florida"},{"adm1_code":3273,"adm1_name":"Maldonado"},{"adm1_code":3275,"adm1_name":"Paysandu"},{"adm1_code":3276,"adm1_name":"Rio Negro"},{"adm1_code":3277,"adm1_name":"Rivera"},{"adm1_code":3279,"ad…	2018-04-03	2023-09-25
2018-9187-LTU	No	nat-cli-dro-dro	Natural	Climatological	Drought	Drought			LTU	Lithuania	Northern Europe	Europe				No	No	Yes			Km2				2018	5		2018	6													82.4107		2018-07-10	2023-09-25
2018-9187-POL	No	nat-cli-dro-dro	Natural	Climatological	Drought	Drought			POL	Poland	Eastern Europe	Europe				No	No	No			Km2				2018	6		2018	7													82.4107		2018-07-10	2023-09-25
2018-9191-NAM	No	nat-cli-dro-dro	Natural	Climatological	Drought	Drought			NAM	Namibia	Sub-Saharan Africa	Africa	Hardap, Kavango East, Khomas, Kunene, Ohangewna, Omusati, Omaheke, Zambezi		Food shortage	Yes	Yes	Yes			Km2				2018	10		2020	12				556000		556000							82.4107	[{"adm1_code":2137,"adm1_name":"Caprivi"},{"adm1_code":2139,"adm1_name":"Hardap"},{"adm1_code":2141,"adm1_name":"Kavango"},{"adm1_code":2142,"adm1_name":"Khomas"},{"adm1_code":2143,"adm1_name":"Kunene"},{"adm1_code":2144,"adm1_name":"Ohangwena"},{"adm1_code":2145,"adm1_name":"Omaheke"},{"adm1_code":2146,"adm1_name":"Omusati"}]	2019-05-08	2023-09-25
2018-9258-AUS	No	nat-cli-dro-dro	Natural	Climatological	Drought	Drought			AUS	Australia	Australia and New Zealand	Oceania	New South Wales, Victoria , Queensland	Lack of rainfall and anomalous warmth		No	No	No			Km2				2018	1		2018	8											1200000	1456122	82.4107	[{"adm1_code":470,"adm1_name":"New South Wales"},{"adm1_code":473,"adm1_name":"Queensland"},{"adm1_code":476,"adm1_name":"Victoria"}]	2018-08-08	2023-09-25
2018-9277-CRI	No	nat-cli-dro-dro	Natural	Climatological	Drought	Drought			CRI	Costa Rica	Latin America and the Caribbean	Americas		El NIno		No	No	No			Km2				2019	3		2019	3													83.9042	[{"adm1_code":983,"adm1_name":"Guanacaste"},{"adm1_code":986,"adm1_name":"Puntarenas"},{"adm1_code":987,"adm1_name":"San Jose"}]	2019-03-18	2023-09-25
2018-9277-GTM	No	nat-cli-dro-dro	Natural	Climatological	Drought	Drought			GTM	Guatemala	Latin America and the Caribbean	Americas				No	No	No			Km2				2018	6		2019	3				1500000		1500000					44669	54203	82.4107		2018-08-09	2023-09-25
2018-9277-HND	No	nat-cli-dro-dro	Natural	Climatological	Drought	Drought			HND	Honduras	Latin America and the Caribbean	Americas		El Nino		No	No	No			Km2				2018	6		2019	3				360000		360000							82.4107		2018-08-09	2023-09-25
2018-9277-NIC	No	nat-cli-dro-dro	Natural	Climatological	Drought	Drought			NIC	Nicaragua	Latin America and the Caribbean	Americas		El Nino		No	No	No			Km2				2018	6		2019	3				300000		300000							82.4107	[{"adm1_code":2187,"adm1_name":"Boaco"},{"adm1_code":2188,"adm1_name":"Carazo"},{"adm1_code":2189,"adm1_name":"Chinandega"},{"adm1_code":2190,"adm1_name":"Chontales"},{"adm1_code":2191,"adm1_name":"Esteli"},{"adm1_code":2193,"adm1_name":"Jinotega"},{"adm1_code":2194,"adm1_name":"Leon"},{"adm1_code":2195,"adm1_name":"Madriz"},{"adm1_code":2196,"adm1_name":"Managua"},{"adm1_code":2197,"adm1_name":"…	2018-08-20	2023-09-25
2018-9277-PAN	No	nat-cli-dro-dro	Natural	Climatological	Drought	Drought			PAN	Panama	Latin America and the Caribbean	Americas		El NIno		No	No	No			Km2				2018	6		2019	3											72000	87367	82.4107		2018-08-09	2023-09-25
2018-9277-SLV	No	nat-cli-dro-dro	Natural	Climatological	Drought	Drought			SLV	El Salvador	Latin America and the Caribbean	Americas	San Vicente, Usulutan and San Miguel zones	Lack of rain, El NIno	Heat wave	No	No	No			Km2				2018	6		2019	3				386610		386610					37000	44897	82.4107	[{"adm1_code":1192,"adm1_name":"San Miguel"},{"adm1_code":1194,"adm1_name":"San Vicente"},{"adm1_code":1197,"adm1_name":"Usulutan"}]	2018-08-08	2023-09-25
2018-9278-AFG	No	nat-cli-dro-dro	Natural	Climatological	Drought	Drought	GLIDE:DR-2018-000052		AFG	Afghanistan	Southern Asia	Asia	Badghis, Daykundi, Hirat, Ghor, Daykundi, Badakhshan, Farah, Helmand, Kandahar, Zabul, Nangarhar		Food shortage	No	No	Yes			Km2				2018	4		2019	7				13500000		13500000							82.4107	[{"adm1_code":273,"adm1_name":"Badghis"},{"adm1_code":277,"adm1_name":"Farah"},{"adm1_code":280,"adm1_name":"Ghor"},{"adm1_code":282,"adm1_name":"Hirat"},{"adm1_code":285,"adm1_name":"Kandahar"},{"adm1_code":292,"adm1_name":"Nangarhar"},{"adm1_code":303,"adm1_name":"Zabul"},{"adm1_code":99878,"adm1_name":"Daykundi"}]	2018-08-09	2023-09-25
2018-9372-IND	No	nat-cli-dro-dro	Natural	Climatological	Drought	Drought			IND	India	Southern Asia	Asia	Karnataka, Maharashtra states	Por rainfall		No	No	No			Km2				2018	9		2019	6				8200000		8200000					1100000	1334779	82.4107	[{"adm1_code":1494,"adm1_name":"Karnataka"},{"adm1_code":1498,"adm1_name":"Maharashtra"}]	2018-10-11	2023-09-25
2018-9469-MRT	No	nat-cli-dro-dro	Natural	Climatological	Drought	Drought	GLIDE:DR-2018-000063		MRT	Mauritania	Sub-Saharan Africa	Africa		Irregular seasonal rainfall in 2017		Yes	No	No			Km2				2018	3		2019	12				350600		350600							82.4107	[{"adm2_code":19494,"adm2_name":"Barkeol"},{"adm2_code":19503,"adm2_name":"Maghta Lahjar"},{"adm2_code":19508,"adm2_name":"Monguel"}]	2019-01-03	2023-09-25
2018-9476-USA	No	nat-cli-dro-dro	Natural	Climatological	Drought	Drought			USA	United States of America	Northern America	Americas	Nationwide			No	No	No			Km2				2018	1		2018	12											3000000	3640305	82.4107	[{"adm1_code":3214,"adm1_name":"Alabama"},{"adm1_code":3216,"adm1_name":"Arizona"},{"adm1_code":3217,"adm1_name":"Arkansas"},{"adm1_code":3218,"adm1_name":"California"},{"adm1_code":3219,"adm1_name":"Colorado"},{"adm1_code":3220,"adm1_name":"Connecticut"},{"adm1_code":3221,"adm1_name":"Delaware"},{"adm1_code":3222,"adm1_name":"District of Columbia"},{"adm1_code":3223,"adm1_name":"Florida"},{"adm1…	2019-02-22	2023-09-25
2018-9491-SEN	No	nat-cli-dro-dro	Natural	Climatological	Drought	Drought			SEN	Senegal	Sub-Saharan Africa	Africa	Northern regions		Food shortage	Yes	No	No			Km2				2018	4		2021	12				320000		320000							82.4107		2021-08-03	2023-09-25
2019-9023-PAK	No	nat-cli-dro-dro	Natural	Climatological	Drought	Drought	GLIDE:DR-2018-000428		PAK	Pakistan	Southern Asia	Asia	Thatta, Dadu, Sanghar, Tharparkar, Umerkot, Kambar Shadadkot, Jamshoro, Badin distrcits (Sindh province ); Pishin, Killa Abdullah, Noshki, Chaghi, Kharan, Washuk, Panjgur, Kech, Jhal Magsi, Awaran, Zhob, Jaffarabad, Barkhan, Quetta, Killah Saifullah, Kohlu, Naseerabad, Kachhi districts (Balochistan province)	El Nino and the decrease in the amount of rainfall during monsoon season	Food shortage	Yes	No	No			Km2				2019	1		2019	12		77		4680912		4680912							83.9042	[{"adm2_code":23614,"adm2_name":"Chagai District"},{"adm2_code":23619,"adm2_name":"Kharan District"},{"adm2_code":23621,"adm2_name":"Kohlu District"},{"adm2_code":23625,"adm2_name":"Panjgur District"},{"adm2_code":23627,"adm2_name":"Quetta District"},{"adm2_code":40289,"adm2_name":"Awaran District"},{"adm2_code":40290,"adm2_name":"Barkhan District"},{"adm2_code":40291,"adm2_name":"Bolan District"…	2019-01-25	2023-09-25
2019-9076-PRK	No	nat-cli-dro-dro	Natural	Climatological	Drought	Drought	GLIDE:DR-2019-000042		PRK	Democratic People's Republic of Korea	Eastern Asia	Asia		Prolonged dry spells, with erratic high temperatures and floods,	Food shortage	No	No	Yes			Km2				2019	1		2019	2				10100000		10100000							83.9042		2019-03-05	2023-09-25
2019-9109-SOM	No	nat-cli-dro-dro	Natural	Climatological	Drought	Drought			SOM	Somalia	Sub-Saharan Africa	Africa	Awdal, Woqooyi Galbeed, Togdheer, Sanaag, Sool, Nugaal, Bari regions	Dry conditions	Food shortage	No	No	No			Km2				2019	2		2019	10				1500000		1500000							83.9042	[{"adm1_code":2688,"adm1_name":"Awdal"},{"adm1_code":2702,"adm1_name":"Sanaag"},{"adm1_code":2703,"adm1_name":"Sool"},{"adm1_code":2704,"adm1_name":"Togdheer"},{"adm1_code":2705,"adm1_name":"Woqooyi Galbeed"}]	2019-03-13	2023-09-25
2019-9137-PHL	No	nat-cli-dro-dro	Natural	Climatological	Drought	Drought			PHL	Philippines	South-eastern Asia	Asia	MIMAROPA Region, Region IX, Region XII, BARMM, Metro Manilla	El Nino		No	No	Yes			Km2				2019	3		2019	4				16000		16000					25600	30511	83.9042	[{"adm1_code":67156,"adm1_name":"Autonomous region in Muslim Mindanao (ARMM)"},{"adm1_code":67159,"adm1_name":"Region IX (Zamboanga Peninsula)"},{"adm1_code":67162,"adm1_name":"Region XII (Soccsksargen)"},{"adm2_code":24210,"adm2_name":"Metropolitan Manila"},{"adm2_code":24230,"adm2_name":"Marinduque"},{"adm2_code":24231,"adm2_name":"Mindoro Occidental"},{"adm2_code":24232,"adm2_name":"Mindoro Or…	2019-04-01	2023-09-25
2019-9145-KEN	No	nat-cli-dro-dro	Natural	Climatological	Drought	Drought	GLIDE:DR-2019-000024		KEN	Kenya	Sub-Saharan Africa	Africa	West Pokot, Tharaka Nithi, Samburu, Nyeri (Kieni), Marsabit, Mandera, Lamu, Laikipia, Kitui, Kilifi, Isiolo, Garissa, Embu, Baringo, Turkana, Wajir	Two consecutive poor rainy seasons	Food shortage	Yes	No	No			Km2				2019	1		2019	9				2600000		2600000							83.9042	[{"adm2_code":51338,"adm2_name":"Nyeri"},{"adm2_code":51340,"adm2_name":"Kilifi"},{"adm2_code":51342,"adm2_name":"Lamu"},{"adm2_code":51347,"adm2_name":"Embu"},{"adm2_code":51348,"adm2_name":"Isiolo"},{"adm2_code":51349,"adm2_name":"Kitui"},{"adm2_code":51352,"adm2_name":"Marsabit"},{"adm2_code":51359,"adm2_name":"Tharaka"},{"adm2_code":51361,"adm2_name":"Garissa"},{"adm2_code":51363,"adm2_name":…	2019-04-11	2023-09-25
2019-9359-LAO	No	nat-cli-dro-dro	Natural	Climatological	Drought	Drought	GLIDE:DR-2020-000017		LAO	Lao People's Democratic Republic	South-eastern Asia	Asia				No	No	No			Km2				2019	7		2019	7													83.9042		2019-07-23	2023-09-25
2019-9359-THA	No	nat-cli-dro-dro	Natural	Climatological	Drought	Drought	GLIDE:DR-2020-000017		THA	Thailand	South-eastern Asia	Asia	North, Northeastern, Central Plains			No	No	Yes			Km2				2019	7		2020	2													83.9042	[{"adm1_code":2851,"adm1_name":"Amnat Charoen"},{"adm1_code":2852,"adm1_name":"Ang Thong"},{"adm1_code":2853,"adm1_name":"Bangkok"},{"adm1_code":2854,"adm1_name":"Buriram"},{"adm1_code":2855,"adm1_name":"Chachoengsao"},{"adm1_code":2856,"adm1_name":"Chainat"},{"adm1_code":2857,"adm1_name":"Chaiyaphum"},{"adm1_code":2858,"adm1_name":"Chanthaburi"},{"adm1_code":2859,"adm1_name":"Chiang Mai"},{"adm1…	2019-07-23	2024-04-10
2019-9359-VNM	No	nat-cli-dro-dro	Natural	Climatological	Drought	Drought	GLIDE:DR-2020-000017		VNM	Viet Nam	South-eastern Asia	Asia	Long An, Tien Giang, Ben Tre, Dong Thap, Vinh Long, Tra Vinh, Soc Trang, An Giang, Kien Giang, Hau Giang, Bac Lieu, Ca Mau, Can Tho city			No	No	No			Km2				2019	7		2020	2				685558		685558							83.9042	[{"adm1_code":3326,"adm1_name":"An Giang"},{"adm1_code":3330,"adm1_name":"Bac Lieu"},{"adm1_code":3332,"adm1_name":"Ben Tre"},{"adm1_code":3339,"adm1_name":"Ca Mau"},{"adm1_code":3343,"adm1_name":"Dong Thap"},{"adm1_code":3356,"adm1_name":"Kien Giang"},{"adm1_code":3362,"adm1_name":"Long An"},{"adm1_code":3377,"adm1_name":"Soc Trang"},{"adm1_code":3384,"adm1_name":"Tien Giang"},{"adm1_code":3386,…	2019-07-23	2023-09-25
2019-9389-LKA	No	nat-cli-dro-dro	Natural	Climatological	Drought	Drought			LKA	Sri Lanka	Southern Asia	Asia	North, North-Western, North-Central, Uva and Eastern Provinces			No	No	No			Km2				2019	8		2020	3				222091		222091							83.9042	[{"adm1_code":2737,"adm1_name":"Eastern"},{"adm1_code":2738,"adm1_name":"North Central"},{"adm1_code":2739,"adm1_name":"North Western"},{"adm1_code":2740,"adm1_name":"Northern"},{"adm1_code":2743,"adm1_name":"Uva"}]	2019-08-20	2023-09-25
2019-9598-ZAF	No	nat-cli-dro-dro	Natural	Climatological	Drought	Drought			ZAF	South Africa	Sub-Saharan Africa	Africa				No	No	No			Km2				2019	1	1	2019	12	31			750000		750000					135000	160898	83.9042		2019-12-06	2023-09-25
2019-9619-BWA	No	nat-cli-dro-dro	Natural	Climatological	Drought	Drought			BWA	Botswana	Sub-Saharan Africa	Africa	Botswana’s Okavango Delta		Food shortage	No	No	Yes			Km2				2019			2019	12				38000		38000							83.9042	[{"adm1_code":660,"adm1_name":"Ngamiland"}]	2019-12-13	2023-09-25
2019-9619-LSO	No	nat-cli-dro-dro	Natural	Climatological	Drought	Drought			LSO	Lesotho	Sub-Saharan Africa	Africa				No	No	Yes			Km2				2019			2019	12				433000		433000							83.9042		2019-12-13	2023-09-25
2019-9619-SWZ	No	nat-cli-dro-dro	Natural	Climatological	Drought	Drought			SWZ	Eswatini	Sub-Saharan Africa	Africa	Shiselweni, Lubombo and Hhohho regions			No	No	No			Km2				2019			2019	12				232000		232000							83.9042	[{"adm1_code":2782,"adm1_name":"Hhohho"},{"adm1_code":2783,"adm1_name":"Lubombo"},{"adm1_code":2785,"adm1_name":"Shiselweni"}]	2019-12-13	2023-09-25
2019-9666-ARG	No	nat-cli-dro-dro	Natural	Climatological	Drought	Drought	GLIDE:DR-2020-000031		ARG	Argentina	Latin America and the Caribbean	Americas	San Martín, Rivadavia, Oran departments (Salta province)			No	No	Yes			Km2				2019			2021	12		8	32	35000		35032							83.9042	[{"adm2_code":4773,"adm2_name":"General Jose de San Martin"},{"adm2_code":4781,"adm2_name":"Oran"},{"adm2_code":4783,"adm2_name":"Rivadavia"}]	2020-03-03	2023-09-25
2019-9667-ZMB	No	nat-cli-dro-dro	Natural	Climatological	Drought	Drought	GLIDE:OT-2019-000132		ZMB	Zambia	Sub-Saharan Africa	Africa	Southern, Western and parts of Lusaka, Eastern and Central provinces		Food shortage	No	No	No			Km2				2019			2020	12				1430000		1430000							83.9042	[{"adm1_code":3426,"adm1_name":"Central"},{"adm1_code":3428,"adm1_name":"Eastern"},{"adm1_code":3430,"adm1_name":"Lusaka"},{"adm1_code":3433,"adm1_name":"Southern"},{"adm1_code":3434,"adm1_name":"Western"}]	2021-03-22	2024-04-10
2020-9206-AGO	No	nat-cli-dro-dro	Natural	Climatological	Drought	Drought	GLIDE:DR-2021-000149		AGO	Angola	Sub-Saharan Africa	Africa	Cunene, Huila, Namibe, Cuanza Sul, Benguela, Huambo	Strong dry spell	Food shortage	Yes	No	No			Km2				2020	12		2022	2				1643316		1643316							84.9392	[{"adm1_code":399,"adm1_name":"Benguela"},{"adm1_code":403,"adm1_name":"Cuanza Sul"},{"adm1_code":404,"adm1_name":"Cunene"},{"adm1_code":405,"adm1_name":"Huambo"},{"adm1_code":406,"adm1_name":"Huila"},{"adm1_code":413,"adm1_name":"Namibe"}]	2021-04-13	2024-02-28
2020-9235-BFA	No	nat-cli-dro-dro	Natural	Climatological	Drought	Drought			BFA	Burkina Faso	Sub-Saharan Africa	Africa			Food shortage	No	No	No			Km2				2020			2020	6				2900000		2900000							84.9392	[{"adm1_code":40276,"adm1_name":"Boucle Du Mouhoun"},{"adm1_code":40277,"adm1_name":"Cascades"},{"adm1_code":40278,"adm1_name":"Centre"},{"adm1_code":40279,"adm1_name":"Centre-est"},{"adm1_code":40280,"adm1_name":"Centre-nord"},{"adm1_code":40281,"adm1_name":"Centre-ouest"},{"adm1_code":40282,"adm1_name":"Centre-sud"},{"adm1_code":40283,"adm1_name":"Est"},{"adm1_code":40284,"adm1_name":"Hauts-bas…	2020-06-10	2023-09-25
2020-9396-LSO	No	nat-cli-dro-dro	Natural	Climatological	Drought	Drought			LSO	Lesotho	Sub-Saharan Africa	Africa		Prolonged dry spells and negative economic impacts of COVID-19	Food shortage	No	No	No			Km2				2020	9		2022	12				766000		766000							84.9392		2020-09-07	2023-09-25
2020-9424-MDG	No	nat-cli-dro-dro	Natural	Climatological	Drought	Drought	GLIDE:DR-2020-000231		MDG	Madagascar	Sub-Saharan Africa	Africa	Betioky, Ampanihy, Tuléar II, Amboasary and Bekily districts, Anosy, Androy, Atsimo Andrefana.	Insufficient rainfall	Famine|Food shortage	No	No	No			Km2				2020	1		2024	2				1680000		1680000							84.9392	[{"adm2_code":154532,"adm2_name":"Bekily"},{"adm2_code":154535,"adm2_name":"Amboasary-Atsimo"},{"adm2_code":154538,"adm2_name":"Ampanihy Ouest"},{"adm2_code":154542,"adm2_name":"Betioky Atsimo"},{"adm2_code":154546,"adm2_name":"Toliary-II"}]	2020-10-14	2024-02-08
2020-9538-MRT	No	nat-cli-dro-dro	Natural	Climatological	Drought	Drought	GLIDE:DR-2020-000167|GLIDE:OT-2022-000240		MRT	Mauritania	Sub-Saharan Africa	Africa	Tagant, Guidimakha, Assaba, Gorgol, Hodh El Charghi Adrar, Brakna, Hodh Chargui, Hodh Ech Chargi and Hodh El Gharbi		Food shortage	No	No	No			Km2				2020	6		2022	11				1400000		1400000							84.9392	[{"adm1_code":2004,"adm1_name":"Adrar"},{"adm1_code":2005,"adm1_name":"Assaba"},{"adm1_code":2006,"adm1_name":"Brakna"},{"adm1_code":2008,"adm1_name":"Gorgol"},{"adm1_code":2009,"adm1_name":"Guidimakha"},{"adm1_code":2010,"adm1_name":"Hodh Ech Chargi"},{"adm1_code":2011,"adm1_name":"Hodh El Gharbi"},{"adm1_code":2014,"adm1_name":"Tagant"}]	2020-12-09	2023-09-25
2020-9569-MLI	No	nat-cli-dro-dro	Natural	Climatological	Drought	Drought			MLI	Mali	Sub-Saharan Africa	Africa	Ménaka, Gao, Mopti, Kidal, Koulikoro and Ségou		Food shortage	No	No	No			Km2				2020			2020	12				6800000		6800000							84.9392	[{"adm1_code":1927,"adm1_name":"Gao"},{"adm1_code":1930,"adm1_name":"Koulikoro"},{"adm1_code":1931,"adm1_name":"Mopti"},{"adm1_code":1932,"adm1_name":"Segou"}]	2020-12-23	2023-09-25
2020-9570-NER	No	nat-cli-dro-dro	Natural	Climatological	Drought	Drought			NER	Niger	Sub-Saharan Africa	Africa	Diffa, Tahoua, Zinder, Maradi, Agadez, Tillabéri regions		Food shortage	No	No	No			Km2				2020			2020	12	23			3700000		3700000							84.9392	[{"adm1_code":2202,"adm1_name":"Agadez"},{"adm1_code":2203,"adm1_name":"Diffa"},{"adm1_code":2205,"adm1_name":"Maradi"},{"adm1_code":2207,"adm1_name":"Tahoua"},{"adm1_code":2208,"adm1_name":"Tillaberi"},{"adm1_code":2209,"adm1_name":"Zinder"}]	2020-12-23	2023-09-25
2020-9582-BRA	No	nat-cli-dro-dro	Natural	Climatological	Drought	Drought			BRA	Brazil	Latin America and the Caribbean	Americas	Rio Grande Do Sul, Santa Catarina			No	No	No			Km2				2020	1		2020	12											3000000	3531938	84.9392	[{"adm1_code":685,"adm1_name":"Rio Grande Do Sul"},{"adm1_code":688,"adm1_name":"Santa Catarina"}]	2021-01-07	2023-09-25
2020-9585-USA	No	nat-cli-dro-dro	Natural	Climatological	Drought	Drought			USA	United States of America	Northern America	Americas	West and central states		Heat wave	No	No	No			Km2				2020	1		2020	12		45									4500000	5297907	84.9392	[{"adm1_code":3214,"adm1_name":"Alabama"},{"adm1_code":3215,"adm1_name":"Alaska"},{"adm1_code":3216,"adm1_name":"Arizona"},{"adm1_code":3217,"adm1_name":"Arkansas"},{"adm1_code":3218,"adm1_name":"California"},{"adm1_code":3219,"adm1_name":"Colorado"},{"adm1_code":3225,"adm1_name":"Hawaii"},{"adm1_code":3226,"adm1_name":"Idaho"},{"adm1_code":3227,"adm1_name":"Illinois"},{"adm1_code":3228,"adm1_nam…	2021-01-13	2023-09-25
2020-9586-MOZ	No	nat-cli-dro-dro	Natural	Climatological	Drought	Drought			MOZ	Mozambique	Sub-Saharan Africa	Africa			Food shortage	No	No	No			Km2				2020	10		2020	12				2700000		2700000							84.9392		2021-01-19	2023-09-25
2020-9609-KEN	No	nat-cli-dro-dro	Natural	Climatological	Drought	Drought	GLIDE:DR-2021-000054|GLIDE:DR-2021-000111		KEN	Kenya	Sub-Saharan Africa	Africa	Marsabit, Mandera, Garissa, Wajir, Kilifi, Tana River, Makueni, Lamu, Samburu, Kitui, Isiolo and Laikipia	Lack of rains	Food shortage	Yes	No	No			Km2				2020	12		2022	12				4500000		4500000					250000	294328	84.9392	[{"adm2_code":51340,"adm2_name":"Kilifi"},{"adm2_code":51342,"adm2_name":"Lamu"},{"adm2_code":51346,"adm2_name":"Tana River"},{"adm2_code":51348,"adm2_name":"Isiolo"},{"adm2_code":51349,"adm2_name":"Kitui"},{"adm2_code":51351,"adm2_name":"Makueni"},{"adm2_code":51352,"adm2_name":"Marsabit"},{"adm2_code":51361,"adm2_name":"Garissa"},{"adm2_code":51363,"adm2_name":"Mandera"},{"adm2_code":51364,"adm…	2021-03-16	2023-09-25
2020-9609-SOM	No	nat-cli-dro-dro	Natural	Climatological	Drought	Drought	GLIDE:DR-2021-000054|GLIDE:DR-2021-000111		SOM	Somalia	Sub-Saharan Africa	Africa	Gedo; Las Anod / Hudun and Taleb (Sool), Eilafwen (Sanaag), Odwein and Ainabo (Togdheer), Luqbaya / Zeila (Awdal) Somaliland state; Goldogo (Mudug); Ishkushuban (Bari), Puntland state; Nugaal; Galmudug, Jubaland, Puntland and South West states		Famine	Yes	No	Yes			Km2				2021	3		2022	12				7100000		7100000					993000	1116615	88.9295	[{"adm1_code":2689,"adm1_name":"Bakool"},{"adm1_code":2690,"adm1_name":"Bari"},{"adm1_code":2691,"adm1_name":"Bay"},{"adm1_code":2693,"adm1_name":"Galgaduud"},{"adm1_code":2694,"adm1_name":"Gedo"},{"adm1_code":2696,"adm1_name":"Juba Hoose"},{"adm1_code":2697,"adm1_name":"Shabelle Hoose"},{"adm1_code":2698,"adm1_name":"Juba Dhexe"},{"adm1_code":2700,"adm1_name":"Mudug"},{"adm1_code":2701,"adm1_nam…	2021-03-16	2024-04-23
2021-9078-CHN	No	nat-cli-dro-dro	Natural	Climatological	Drought	Drought			CHN	China	Eastern Asia	Asia	Guangxi, Hunan, Yunnan, Shaanxi, Gansu, Ningxia, Fujian provinces	Below-average precipitation		No	No	No			Km2				2021	1	1	2021	12	31										3100000	3485908	88.9295	[{"adm1_code":901,"adm1_name":"Fujian Sheng"},{"adm1_code":902,"adm1_name":"Gansu Sheng"},{"adm1_code":904,"adm1_name":"Guangxi Zhuangzu Zizhiqu"},{"adm1_code":912,"adm1_name":"Hunan Sheng"},{"adm1_code":918,"adm1_name":"Ningxia Huizu Zizhiqu"},{"adm1_code":920,"adm1_name":"Shaanxi Sheng"},{"adm1_code":929,"adm1_name":"Yunnan Sheng"}]	2021-02-10	2023-09-25
2021-9116-AFG	No	nat-cli-dro-dro	Natural	Climatological	Drought	Drought	GLIDE:DR-2021-000022		AFG	Afghanistan	Southern Asia	Asia	Badghis, Badakhshan, Baghlan, Balkh, Takhar, Jawzjan, Sar-i-Pul, Samangan, Faryab, Kunduz, Herat	Low rain- and snowfall, La nina	Food shortage	No	No	Yes			Km2				2021	1		2023	5				11000000		11000000							88.9295	[{"adm1_code":272,"adm1_name":"Badakhshan"},{"adm1_code":273,"adm1_name":"Badghis"},{"adm1_code":274,"adm1_name":"Baghlan"},{"adm1_code":275,"adm1_name":"Balkh"},{"adm1_code":278,"adm1_name":"Faryab"},{"adm1_code":282,"adm1_name":"Hirat"},{"adm1_code":283,"adm1_name":"Jawzjan"},{"adm1_code":289,"adm1_name":"Kunduz"},{"adm1_code":298,"adm1_name":"Samangan"},{"adm1_code":299,"adm1_name":"Sar-e-Pul"…	2021-03-02	2023-09-25
2021-9148-ZAF	No	nat-cli-dro-dro	Natural	Climatological	Drought	Drought			ZAF	South Africa	Sub-Saharan Africa	Africa			Food shortage	No	No	No			Km2				2021	3		2021	3				12000000		12000000							88.9295		2021-03-16	2023-09-25
2021-9359-MOZ	No	nat-cli-dro-dro	Natural	Climatological	Drought	Drought			MOZ	Mozambique	Sub-Saharan Africa	Africa	Cabo Delgado, Niassa and Nampula provinces			No	No	No			Km2				2021	6		2022	11				1562771		1562771							88.9295	[{"adm1_code":2112,"adm1_name":"Cabo Delgado"},{"adm1_code":2118,"adm1_name":"Nampula"},{"adm1_code":2119,"adm1_name":"Niassa"}]	2021-06-28	2023-09-25
2021-9459-KAZ	No	nat-cli-dro-dro	Natural	Climatological	Drought	Drought	GLIDE:DR-2021-000085		KAZ	Kazakhstan	Central Asia	Asia	Mangistau, Turkestan and Kyzylorda regions		Heat wave	No	No	No			Km2				2021	6		2021	7				71000		71000							88.9295	[{"adm1_code":1721,"adm1_name":"Kyzylordinskaya"},{"adm1_code":1724,"adm1_name":"Mangistauskaya"},{"adm1_code":1728,"adm1_name":"Yujno-kazachstanskaya"}]	2021-07-29	2023-09-25
2021-9510-IRN	No	nat-cli-dro-dro	Natural	Climatological	Drought	Drought	GLIDE:DR-2021-000089		IRN	Iran (Islamic Republic of)	Southern Asia	Asia	Sistan and Baluchestan, South Khorasan, Kerman, Hormozgan, Khuzestan, Isfahan, Khorasan Razavi			No	No	No			Km2				2021			2022	8				4900000		4900000							88.9295	[{"adm1_code":1543,"adm1_name":"Esfahan"},{"adm1_code":1547,"adm1_name":"Khorasan"},{"adm1_code":1548,"adm1_name":"Hormozgan"},{"adm1_code":1550,"adm1_name":"Kerman"},{"adm1_code":1551,"adm1_name":"Khuzestan"},{"adm1_code":1559,"adm1_name":"Sistan-o baluchestan"}]	2021-08-13	2024-04-23
2021-9546-ETH	No	nat-cli-dro-dro	Natural	Climatological	Drought	Drought	GLIDE:DR-2021-000121		ETH	Ethiopia	Sub-Saharan Africa	Africa	Tigray, Afar and Amhara		Food shortage	Yes	No	No			Km2				2021	5		2022	2				6800000		6800000							88.9295	[{"adm1_code":1228,"adm1_name":"Afar"},{"adm1_code":1229,"adm1_name":"Amhara"},{"adm1_code":1237,"adm1_name":"Tigray"}]	2021-08-27	2023-09-25
2021-9547-TUV	No	nat-cli-dro-dro	Natural	Climatological	Drought	Drought	GLIDE:DR-2021-000120		TUV	Tuvalu	Polynesia	Oceania	Funafuti with Nukufetau (central); Nanumea, Nanumaga, Niutao, Nui, Vaitupu (northern)			No	No	No			Km2				2021	1		2021	6				10204		10204							88.9295	[{"adm1_code":3103,"adm1_name":"Administrative unit not available"}]	2021-08-27	2023-09-25
2021-9548-IRQ	No	nat-cli-dro-dro	Natural	Climatological	Drought	Drought	GLIDE:DR-2021-000119		IRQ	Iraq	Western Asia	Asia			Heat wave	No	No	No			Km2				2021	1		2023	8				7000000		7000000							88.9295		2021-08-27	2023-09-25
2021-9548-SYR	No	nat-cli-dro-dro	Natural	Climatological	Drought	Drought	GLIDE:DR-2021-000119		SYR	Syrian Arab Republic	Western Asia	Asia	Hasakah, Aleppo, Raqqa, Deir-ez-Zor, Homs	Poor precipitation, abnormally high air temperatures	Food shortage	No	No	No			Km2				2021	1		2022	7				5500000		5500000							88.9295	[{"adm1_code":2834,"adm1_name":"Aleppo"},{"adm1_code":2839,"adm1_name":"Dayr_Az_Zor"},{"adm1_code":2841,"adm1_name":"Hassakeh"},{"adm1_code":2842,"adm1_name":"Homs"},{"adm1_code":2845,"adm1_name":"Raqqa"}]	2021-08-27	2023-09-25
2021-9569-BRA	No	nat-cli-dro-dro	Natural	Climatological	Drought	Drought			BRA	Brazil	Latin America and the Caribbean	Americas	Paraná River region			No	No	Yes			Km2				2021	1		2021	12											3000000	3373459	88.9295	[{"adm1_code":680,"adm1_name":"Parana"}]	2021-09-14	2023-09-25
2021-9639-SSD	No	nat-cli-dro-dro	Natural	Climatological	Drought	Drought	GLIDE:DR-2021-000065		SSD	South Sudan	Sub-Saharan Africa	Africa	Aweil South (Northern Bahr el Gazzal State), Aweil East (Northern Bahr el Gazzal State), Gogrial West (Warrap State); Tonj South (Warrap State):		Food shortage	No	No	No			Km2				2021			2022	11				7723670		7723670							88.9295	[{"adm2_code":37077,"adm2_name":"Aweil"},{"adm2_code":37127,"adm2_name":"Gogrial"},{"adm2_code":37129,"adm2_name":"Tonj"}]	2021-09-29	2023-09-25
2021-9786-ZWE	No	nat-cli-dro-dro	Natural	Climatological	Drought	Drought	GLIDE:DR-2021-000168		ZWE	Zimbabwe	Sub-Saharan Africa	Africa	Matabeleland South, Manicaland, Masvingo,	Covid 19 pandemic, crop pests, food insecurity, and livestock diseases	Food shortage	No	No	No			Km2				2021	8		2022	2				167500		167500							88.9295	[{"adm1_code":3437,"adm1_name":"Manicaland"},{"adm1_code":3441,"adm1_name":"Masvingo"},{"adm1_code":3443,"adm1_name":"Matabeleland South"}]	2021-12-08	2023-09-25
2021-9787-ZMB	No	nat-cli-dro-dro	Natural	Climatological	Drought	Drought	GLIDE:DR-2021-000170		ZMB	Zambia	Sub-Saharan Africa	Africa	Southern, Western, Central, Copper Belt, Eastern, Luapula, Lusaka, Muchinga, North western and Northern provinces		Food shortage	No	No	No			Km2				2021	7		2022	9				1580000		1580000							88.9295	[{"adm1_code":3426,"adm1_name":"Central"},{"adm1_code":3427,"adm1_name":"Copperbelt"},{"adm1_code":3428,"adm1_name":"Eastern"},{"adm1_code":3429,"adm1_name":"Luapula"},{"adm1_code":3430,"adm1_name":"Lusaka"},{"adm1_code":3431,"adm1_name":"North-Western"},{"adm1_code":3432,"adm1_name":"Northern"},{"adm1_code":3433,"adm1_name":"Southern"},{"adm1_code":3434,"adm1_name":"Western"}]	2021-12-08	2023-09-25
2021-9846-USA	No	nat-cli-dro-dro	Natural	Climatological	Drought	Drought			USA	United States of America	Northern America	Americas	Nationwide			No	No	No			Km2				2021	1	1	2021	12	31										9000000	10120377	88.9295	[{"adm1_code":3214,"adm1_name":"Alabama"},{"adm1_code":3216,"adm1_name":"Arizona"},{"adm1_code":3217,"adm1_name":"Arkansas"},{"adm1_code":3218,"adm1_name":"California"},{"adm1_code":3219,"adm1_name":"Colorado"},{"adm1_code":3220,"adm1_name":"Connecticut"},{"adm1_code":3221,"adm1_name":"Delaware"},{"adm1_code":3222,"adm1_name":"District of Columbia"},{"adm1_code":3223,"adm1_name":"Florida"},{"adm1…	2022-01-25	2024-04-23
2021-9848-TZA	No	nat-cli-dro-dro	Natural	Climatological	Drought	Drought	GLIDE:DR-2022-000112		TZA	United Republic of Tanzania	Sub-Saharan Africa	Africa	Handeni, Longido, Mkinga, and Monduli	Prolonged periods of dry spells	Food shortage	No	No	No			Km2				2021	11		2022	12				2100000		2100000							88.9295	[{"adm2_code":115037,"adm2_name":"Monduli"},{"adm2_code":115121,"adm2_name":"Longido"},{"adm2_code":115085,"adm2_name":"Handeni"},{"adm2_code":115105,"adm2_name":"Mkinga"},{"adm2_code":115110,"adm2_name":"Handeni Township Authority"}]	2022-04-20	2024-04-23
2022-9123-MHL	No	nat-cli-dro-dro	Natural	Climatological	Drought	Drought	GLIDE:DR-2022-000176		MHL	Marshall Islands	Micronesia	Oceania	Aur, Ailinglaplap, Ailuk, Jabot, Jaluit, Lae, Lib, Likiep, Maloelap, Mejit, Mejjato/Ebadon, Namdrik, Namu, Utrok, Ujae, Wotho, Wotje			No	No	No			Km2				2022	1		2022	3				4480		4480							96.0463		2022-03-02	2023-09-26
2022-9174-ETH	No	nat-cli-dro-dro	Natural	Climatological	Drought	Drought	GLIDE:DR-2022-000168		ETH	Ethiopia	Sub-Saharan Africa	Africa	Somali region and Oromia (Boran and Moyale zones), SNNP, South-West	La NIna		No	No	No			Km2				2022			2023	2				24100000		24100000					640000	666345	96.0463	[{"adm1_code":1236,"adm1_name":"SNNPR"},{"adm1_code":47679,"adm1_name":"Somali"}]	2022-03-25	2023-09-26
2022-9209-USA	No	nat-cli-dro-dro	Natural	Climatological	Drought	Drought			USA	United States of America	Northern America	Americas	Nation wide; Arizona, Nevada, California, Oregon and Texas		Heat wave	No	No	No			Km2				2022	1		2022	12		136									22000000	22905609	96.0463	[{"adm1_code":3216,"adm1_name":"Arizona"},{"adm1_code":3218,"adm1_name":"California"},{"adm1_code":3242,"adm1_name":"Nevada"},{"adm1_code":3251,"adm1_name":"Oregon"},{"adm1_code":3257,"adm1_name":"Texas"}]	2022-04-14	2023-09-26
2022-9211-BRA	No	nat-cli-dro-dro	Natural	Climatological	Drought	Drought			BRA	Brazil	Latin America and the Caribbean	Americas				No	No	No			Km2				2022	1		2022	12											4000000	4164656	96.0463		2022-04-14	2023-09-26
2022-9252-CPV	No	nat-cli-dro-dro	Natural	Climatological	Drought	Drought	GLIDE:CE-2022-000200		CPV	Cabo Verde	Sub-Saharan Africa	Africa	Ribeira Grande de Santiago, Santa Cruz, Sao Domingos (Island of Santiago ); and Porto Novo (Santo Antao island)		Food shortage	Yes	No	Yes			Km2				2022			2022	4				46093		46093							96.0463	[{"adm1_code":848,"adm1_name":"Santiago"},{"adm1_code":849,"adm1_name":"Santo Antao"}]	2022-04-29	2024-02-28
2022-9254-NER	No	nat-cli-dro-dro	Natural	Climatological	Drought	Drought	GLIDE:OT-2022-000263		NER	Niger	Sub-Saharan Africa	Africa	Agadez, Diffa, Tillaberi, Tahoua, Maradi		Food shortage	No	No	No			Km2				2022			2022	5				4400000		4400000							96.0463	[{"adm1_code":2202,"adm1_name":"Agadez"},{"adm1_code":2203,"adm1_name":"Diffa"},{"adm1_code":2205,"adm1_name":"Maradi"},{"adm1_code":2207,"adm1_name":"Tahoua"},{"adm1_code":2208,"adm1_name":"Tillaberi"}]	2022-05-02	2023-09-26
2022-9335-TCD	No	nat-cli-dro-dro	Natural	Climatological	Drought	Drought			TCD	Chad	Sub-Saharan Africa	Africa	Bahr El Gazal (Nord, Ouest, Sud), Batha (Est, Ouest), Fitri, Fada, Mourtcha, Kanem, Wadi-Bissam, Mamdi, Assoungha, Djourouf Al Ahmar, Ouara, Aboudeia, Haraze Mangueigne, Abdi, Kimiti, Tibesti (Est, Ouest)		Food shortage	No	No	Yes			Km2				2022	6		2022	8				2135362		2135362							96.0463		2022-06-02	2023-09-26
2022-9370-DJI	No	nat-cli-dro-dro	Natural	Climatological	Drought	Drought	GLIDE:DR-2022-000238		DJI	Djibouti	Sub-Saharan Africa	Africa	Ali Sabieh, Arta, Dikhil, Obock and Tadjoura	Ongoing drought and compounding regional and international shocks	Food shortage	No	No	No			Km2				2022	6		2022	7				192168		192168							96.0463	[{"adm1_code":1093,"adm1_name":"Ali Sabieh"},{"adm1_code":1094,"adm1_name":"Dikhil"},{"adm1_code":1096,"adm1_name":"Obock"},{"adm1_code":1097,"adm1_name":"Tadjourah"}]	2022-06-29	2023-09-26
2022-9405-FRA	No	nat-cli-dro-dro	Natural	Climatological	Drought	Drought			FRA	France	Western Europe	Europe		Lack of rains		No	No	No			Km2				2022	7		2022	8													96.0463		2022-08-09	2023-09-26
2022-9405-GBR	No	nat-cli-dro-dro	Natural	Climatological	Drought	Drought			GBR	United Kingdom of Great Britain and Northern Ireland	Northern Europe	Europe				No	No	Yes			Km2				2022	4		2022	8													96.0463		2022-08-19	2023-09-26
2022-9405-ITA	No	nat-cli-dro-dro	Natural	Climatological	Drought	Drought			ITA	Italy	Southern Europe	Europe	Émilie-Romagne, Frioul-Vénétie Julienne, Lombardie, Vénétie et dans le Piémont	Lack of rain		No	No	Yes			Km2				2022	6		2022	12													96.0463		2022-07-05	2023-09-26
2022-9405-PRT	No	nat-cli-dro-dro	Natural	Climatological	Drought	Drought			PRT	Portugal	Southern Europe	Europe			Heat wave	No	No	No			Km2				2022	7		2023	6													96.0463		2022-08-09	2023-09-26
2022-9436-UGA	No	nat-cli-dro-dro	Natural	Climatological	Drought	Drought			UGA	Uganda	Sub-Saharan Africa	Africa	Napak, Kaabong, Kotido, Moroto districts (Karamoja)		Famine	No	No	No			Km2				2022	7		2022	12		2465		518000		518000							96.0463	[{"adm1_code":765,"adm1_name":"Kotido"},{"adm1_code":772,"adm1_name":"Moroto"},{"adm1_code":775,"adm1_name":"Napak"},{"adm1_code":47074,"adm1_name":"Kaabong"}]	2022-07-19	2023-09-26
2022-9524-CHN	No	nat-cli-dro-dro	Natural	Climatological	Drought	Drought			CHN	China	Eastern Asia	Asia	Chongqing, Hubei, Jiangxi, Tibet, Sichuan, Hunan, Anhui	High temperatures and lack of rainfall	Heat wave	No	No	No			Km2				2022	1		2022	12				6100000		6100000					7600000	7912847	96.0463	[{"adm1_code":898,"adm1_name":"Anhui Sheng"},{"adm1_code":900,"adm1_name":"Chongqing Shi"},{"adm1_code":911,"adm1_name":"Hubei Sheng"},{"adm1_code":912,"adm1_name":"Hunan Sheng"},{"adm1_code":914,"adm1_name":"Jiangxi Sheng"},{"adm1_code":924,"adm1_name":"Sichuan Sheng"}]	2022-08-19	2023-09-26
2022-9781-BFA	No	nat-cli-dro-dro	Natural	Climatological	Drought	Drought			BFA	Burkina Faso	Sub-Saharan Africa	Africa				No	No	No			Km2				2022			2022	11				3500928		3500928							96.0463		2022-11-29	2023-09-26
2022-9782-CMR	No	nat-cli-dro-dro	Natural	Climatological	Drought	Drought			CMR	Cameroon	Sub-Saharan Africa	Africa				No	No	No			Km2				2022			2022	11				2389127		2389127							96.0463		2022-11-29	2023-09-26
2022-9783-CAF	No	nat-cli-dro-dro	Natural	Climatological	Drought	Drought			CAF	Central African Republic	Sub-Saharan Africa	Africa				No	No	No			Km2				2022			2022	11				2221692		2221692							96.0463		2022-11-29	2023-09-26
2022-9784-COD	No	nat-cli-dro-dro	Natural	Climatological	Drought	Drought			COD	Democratic Republic of the Congo	Sub-Saharan Africa	Africa				No	No	No			Km2				2022			2022	11				25972806		25972806							96.0463		2022-11-29	2023-09-26
2022-9785-MWI	No	nat-cli-dro-dro	Natural	Climatological	Drought	Drought			MWI	Malawi	Sub-Saharan Africa	Africa				No	No	No			Km2				2022			2022	11				2678193		2678193							96.0463		2022-11-29	2023-09-26
2022-9786-MLI	No	nat-cli-dro-dro	Natural	Climatological	Drought	Drought			MLI	Mali	Sub-Saharan Africa	Africa				No	No	No			Km2				2022			2022	11				1735753		1735753							96.0463		2022-11-29	2023-09-26
2022-9787-NGA	No	nat-cli-dro-dro	Natural	Climatological	Drought	Drought			NGA	Nigeria	Sub-Saharan Africa	Africa				No	No	No			Km2				2022			2022	11				19110398		19110398							96.0463		2022-11-29	2023-09-26
2022-9788-SDN	No	nat-cli-dro-dro	Natural	Climatological	Drought	Drought			SDN	Sudan	Northern Africa	Africa				No	No	No			Km2				2022			2022	11				11839300		11839300							96.0463		2022-11-29	2023-09-26
2022-9863-URY	No	nat-cli-dro-dro	Natural	Climatological	Drought	Drought	GLIDE:DR-2023-000010		URY	Uruguay	Latin America and the Caribbean	Americas	Cerro Largo, Florida, Lavalleja, San Jose, Tacuarembo	Lack of rainfall recorded since September 2022		No	No	Yes			Km2				2022	10		2023	4				409115		409115							96.0463	[{"adm1_code":3267,"adm1_name":"Cerro Largo"},{"adm1_code":3271,"adm1_name":"Florida"},{"adm1_code":3272,"adm1_name":"Lavalleja"},{"adm1_code":3280,"adm1_name":"San Jose"},{"adm1_code":3282,"adm1_name":"Tacuarembo"}]	2023-04-19	2023-09-26
2023-9167-HND	No	nat-cli-dro-dro	Natural	Climatological	Drought	Drought			HND	Honduras	Latin America and the Caribbean	Americas	Choculeta, Sabanagrande, Tegulcipalga, Jacaleapa, Lepaguare, Catacamas, Yoro, Flores, La Lima, Sana Rosa de Copan, Ocotepeque, La Esperanza	El Nino		No	No	No			Km2				2023	1		2023	7				10300		10300							100	[{"adm1_code":1420,"adm1_name":"Atlantida"},{"adm1_code":1421,"adm1_name":"Choluteca"},{"adm1_code":1433,"adm1_name":"Ocotepeque"},{"adm1_code":1438,"adm1_name":"Yoro"},{"adm2_code":17287,"adm2_name":"La Lima"},{"adm2_code":17313,"adm2_name":"Sabanagrande"},{"adm2_code":17335,"adm2_name":"La Esperanza"},{"adm2_code":17413,"adm2_name":"Catacamas"},{"adm2_code":17439,"adm2_name":"Jacaleapa"}]	2023-03-23	2023-09-26
2023-9234-ESP	No	nat-cli-dro-dro	Natural	Climatological	Drought	Drought			ESP	Spain	Southern Europe	Europe	Catalognia, Andalusia, Asturias		Heat wave|Water shortage|Wildfire	No	No	Yes			Km2				2023	1		2024	2				26000		26000			300000	300000	2400000	2400000	100	[{"adm1_code":2716,"adm1_name":"Andalucía"},{"adm1_code":2718,"adm1_name":"Principado de Asturias"},{"adm1_code":2724,"adm1_name":"Cataluña/Catalunya"}]	2023-04-19	2024-02-09
2023-9234-ITA	No	nat-cli-dro-dro	Natural	Climatological	Drought	Drought			ITA	Italy	Southern Europe	Europe	Sicile, Sardaigne		Fire|Pollution	No	No	Yes			Km2				2023			2024														100		2024-02-26	2024-03-12
2023-9494-IDN	No	nat-cli-dro-dro	Natural	Climatological	Drought	Drought	GLIDE:DR-2023-000154		IDN	Indonesia	South-eastern Asia	Asia	Nangroe Aceh Darussalam, Sumatera Utara, Sumatera Barat, Riau, Jambi, Sumatera Selatan, Bengkulu, Lampung, Bangka Belitung, Kepulauan-riau, Dki Jakarta, Jawa Barat, Jawa Tengah, Daerah Istimewa Yogyakarta, Jawa Timur, Banten, Bali, Nusatenggara Barat, Nusatenggara Timur, Kalimantan Barat, Kalimantan Tengah, Kalimantan Selatan, Kalimantan Timur, Sulawesi Utara, Sulawesi Tengah, Sulawesi Selatan, S…	El Nino		No	No	No			Km2				2023	6		2023	12				18750000		18750000							100	[{"adm1_code":73617,"adm1_name":"Papua"}]	2023-08-02	2024-03-27
2023-9589-URY	No	nat-cli-dro-dro	Natural	Climatological	Drought	Drought	GLIDE:DR-2023-000010		URY	Uruguay	Latin America and the Caribbean	Americas	Cerro Largo, Florida, Lavalleja, San Jose, Tacuarembo	La nina, lack of rainfall since September 2022		No	No	Yes		3623	Km2				2023	1		2023	11				409115		409115							100		2023-09-05	2023-12-08
2023-9651-BRA	No	nat-cli-dro-dro	Natural	Climatological	Drought	Drought			BRA	Brazil	Latin America and the Caribbean	Americas	Amazonas state			No	No	Yes			Km2				2023	3	1	2023	12	31			608000		608000					2500000	2500000	100		2023-10-11	2024-01-26
2023-9706-BOL	No	nat-cli-dro-dro	Natural	Climatological	Drought	Drought	GLIDE:DR-2023-000191		BOL	Bolivia (Plurinational State of)	Latin America and the Caribbean	Americas	Cochabamba, Chuquisaca, La Paz, Oruro, Santa Cruz	El Nino	Heat wave	No	No	Yes			Km2				2023	9		2023	12				1948056		1948056							100		2023-11-03	2023-12-21
2023-9868-USA	No	nat-cli-dro-dro	Natural	Climatological	Drought	Drought			USA	United States of America	Northern America	Americas	Texas, Louisiana, Oklahoma, Kansas, Illinois, Missouri, Nebraska, Washington, Oregon, Montana		Heat wave	No	No	No			Km2				2023	4	1	2023	9	30	247									14500000	14500000	100		2024-01-17	2024-02-27
2023-9872-CHN	No	nat-cli-dro-dro	Natural	Climatological	Drought	Drought			CHN	China	Eastern Asia	Asia				No	No	No			Km2				2023	1	1	2023	12	31										2700000	2700000	100		2024-02-12	2024-03-04
2023-9873-FSM	No	nat-cli-dro-dro	Natural	Climatological	Drought	Drought	GLIDE:DR-2023-000130		FSM	Micronesia (Federated States of)	Micronesia	Oceania	Chuuk, Kosrae, Pohnpei, Yap	El Nino		No	No	Yes			Km2				2023	9		2024	3				113000		113000							100		2024-02-13	2024-04-03

## Sheet: Analysis
Row Labels	Count of Country	Sum of Total Affected	Sum of Total Damage ('000 US$)
1994	13	95015000	13995200
1995	6	10871994	112800
1996	6	3342000	1742400
1997	18	8573300	1515100
1998	20	14054335	513200
1999	23	99037545	9347000
2000	27	81225415	3655165
2001	22	32081154	36400
2002	25	377694935	7871475
2003	14	67732075	691000
2004	11	17971500	2991275
2005	20	29550990	462120
2006	9	23857000	3135573
2007	11	5278144	706000
2008	16	34068000	234000
2009	18	86295500	3628700
2010	17	49372978	3884700
2011	17	30423194	8142000
2012	21	35563085	25481200
2013	9	10504904	1587000
2014	18	70447051	10975000
2015	29	383685115	22017299
2016	14	29526000	3554000
2017	12	18561874	6122000
2018	16	25548210	9353669
2019	16	22722593	160600
2020	11	26089316	7750000
2021	17	67515145	16093000
2022	23	107353415	34240000
2023	9	21751471	22100000
Grand Total	488	1885713238	222097876
Row Labels	Count of Country	Sum of Total Affected	Sum of Total Damage ('000 US$)
1994	13	95015000	13995200
Bolivia (Plurinational State of)	1	50000	0
Brazil	1	0	0
Cambodia	1	5000000	100000
China	2	88690000	13755200
Costa Rica	1	0	1000
El Salvador	1	0	1000
Guatemala	1	0	10000
Honduras	1	0	10000
Kenya	1	1200000	0
New Zealand	1	0	100000
Nicaragua	1	75000	16000
Puerto Rico	1	0	2000
1995	6	10871994	112800
Burkina Faso	1	75590	0
China	1	9060000	12800
Mexico	1	0	100000
Namibia	1	163200	0
South Africa	1	300000	0
Zambia	1	1273204	0
1996	6	3342000	1742400
Djibouti	1	100000	0
India	1	0	542400
Mexico	1	0	1200000
Rwanda	1	82000	0
Sudan	1	160000	0
United Republic of Tanzania	1	3000000	0
1997	18	8573300	1515100
Angola	1	105000	0
Chad	1	356000	0
China	1	0	169100
Ecuador	1	34000	0
Ethiopia	1	986200	0
France	1	0	10000
Guyana	1	607200	29000
Honduras	1	0	0
Indonesia	1	1065000	88000
Italy	1	0	800000
Kenya	1	1600000	0
Mauritania	1	21400	0
Nicaragua	1	290000	2000
Niger	1	8500	0
Papua New Guinea	1	500000	0
Portugal	1	0	10000
Solomon Islands	1	0	0
Viet Nam	1	3000000	407000
1998	20	14054335	513200
Brazil	1	10000000	122000
Burkina Faso	1	20700	0
Cabo Verde	1	10000	0
Colombia	1	100000	0
Costa Rica	1	0	23000
Cuba	1	820000	180000
El Salvador	1	0	170000
Ethiopia	1	0	15600
Fiji	1	263455	0
Guinea	1	0	0
Iraq	1	0	0
Malaysia	1	5000	0
Micronesia (Federated States of)	1	28800	0
Mozambique	1	0	0
Namibia	1	25000	1000
Philippines	1	2600000	0
Russian Federation	1	0	0
Solomon Islands	1	380	0
Uganda	1	126000	1600
Zimbabwe	1	55000	0
1999	23	99037545	9347000
Burundi	1	650000	0
China	1	19000000	0
Eritrea	1	2300000	0
Ethiopia	1	4900000	0
Iran (Islamic Republic of)	1	37000000	3300000
Israel	1	0	75000
Jordan	1	180000	0
Kenya	1	23000000	0
Kiribati	1	84000	0
Lao People's Democratic Republic	1	20000	0
Mauritius	1	0	175000
Mexico	1	65000	100000
Morocco	1	275000	900000
Pakistan	1	2200000	247000
Paraguay	1	40000	0
Rwanda	1	894545	0
Spain	1	0	3200000
Syrian Arab Republic	1	329000	0
Thailand	1	6000000	0
Uganda	1	700000	0
United States of America	1	0	1100000
Uruguay	1	0	250000
Viet Nam	1	1400000	0
2000	27	81225415	3655165
Afghanistan	1	2580000	50
Armenia	1	297000	100000
Azerbaijan	1	0	100000
Bolivia (Plurinational State of)	1	20000	0
Bosnia and Herzegovina	1	0	158000
Bulgaria	1	0	0
China	3	20000000	796115
Cuba	1	0	0
Cyprus	1	0	0
Georgia	1	696000	200000
Honduras	1	1125	0
India	1	50000000	588000
Jamaica	1	0	6000
Jordan	1	150000	0
Madagascar	1	231290	0
Mongolia	1	450000	0
Nicaragua	1	0	0
Republic of Moldova	1	0	0
Romania	1	0	500000
Somalia	1	1200000	0
Sudan	1	2000000	0
Tajikistan	1	3000000	57000
United States of America	2	0	1100000
Uzbekistan	1	600000	50000
2001	22	32081154	36400
Angola	1	0	0
Brazil	1	1000000	0
Burkina Faso	1	0	0
Cambodia	1	300000	0
Cameroon	1	0	0
Chad	1	800000	0
China	2	16330000	0
Djibouti	1	100000	0
El Salvador	1	400000	22400
Eswatini	1	970000	0
Guatemala	1	113596	14000
Honduras	1	195000	0
Mali	1	0	0
Mauritania	1	1000000	0
Mozambique	1	100000	0
Namibia	1	0	0
Nicaragua	1	188000	0
Niger	1	3584558	0
Republic of Korea	1	0	0
Sri Lanka	1	1000000	0
Zimbabwe	1	6000000	0
2002	25	377694935	7871475
Australia	1	0	2000000
Brazil	1	0	0
Cabo Verde	1	30000	0
Cambodia	1	650000	38000
China	3	64560000	1210000
Gambia	1	0	0
Guinea-Bissau	1	100000	0
Honduras	1	220000	0
India	1	300000000	910722
Italy	1	0	0
Lesotho	1	500000	0
Madagascar	1	600000	0
Malawi	1	2829435	0
Mexico	1	0	210000
Mozambique	1	600000	0
Namibia	1	345000	0
Peru	1	21500	0
Philippines	1	0	453
Senegal	1	284000	0
Thailand	1	5000000	2300
Uganda	1	655000	0
United States of America	1	0	3300000
Viet Nam	1	1300000	200000
2003	14	67732075	691000
Argentina	1	0	120000
Bosnia and Herzegovina	1	62575	140000
Burundi	1	0	0
China	2	51000000	0
Croatia	1	0	330000
Ethiopia	1	12600000	0
Haiti	1	35000	0
Hungary	1	0	100000
Indonesia	1	15000	1000
Mozambique	1	119500	0
Russian Federation	1	1000000	0
Rwanda	1	1000000	0
United Republic of Tanzania	1	1900000	0
2004	11	17971500	2991275
Angola	1	25000	0
Bolivia (Plurinational State of)	1	55000	0
Brazil	1	0	1650000
Cuba	1	0	3139
Honduras	1	137500	0
Kenya	1	2300000	0
Peru	1	0	0
Portugal	1	0	1338136
Somalia	1	200000	0
South Africa	1	15000000	0
United Republic of Tanzania	1	254000	0
2005	20	29550990	462120
Brazil	1	0	0
Burundi	1	2150000	0
Cambodia	1	600000	0
Cameroon	1	0	0
China	2	7774000	0
Djibouti	1	150000	0
Ethiopia	1	2600000	0
Kenya	1	3500000	0
Madagascar	1	14000	0
Malawi	1	5100000	0
Mali	1	1000000	0
Mozambique	1	1400000	0
Niger	1	3000000	0
Paraguay	1	52990	0
Somalia	1	0	0
Thailand	1	0	420000
Uganda	1	600000	0
Viet Nam	1	410000	42120
Zambia	1	1200000	0
2006	9	23857000	3135573
Afghanistan	1	1900000	0
Australia	1	0	0
China	1	18000000	2910000
Guinea-Bissau	1	32000	0
Lithuania	1	0	225573
Mali	1	25000	0
Nepal	1	200000	0
Peru	1	0	0
United Republic of Tanzania	1	3700000	0
2007	11	5278144	706000
Brazil	1	1000000	0
Djibouti	1	42750	0
Eswatini	1	410000	0
Lesotho	1	475000	0
Malawi	1	520000	0
Mozambique	1	520000	0
Philippines	1	0	0
Republic of Moldova	1	210394	406000
Timor-Leste	1	0	0
United States of America	1	0	300000
Zimbabwe	1	2100000	0
2008	16	34068000	234000
Afghanistan	1	280000	0
Bolivia (Plurinational State of)	1	27500	0
Burundi	1	82500	0
China	1	3700000	234000
Djibouti	1	340000	0
Eritrea	1	1700000	0
Ethiopia	1	6400000	0
Kenya	1	3800000	0
Madagascar	1	720000	0
Mozambique	1	500000	0
Paraguay	1	18000	0
Somalia	1	3300000	0
Syrian Arab Republic	1	1300000	0
Tajikistan	1	800000	0
Thailand	1	10000000	0
Uganda	1	1100000	0
2009	18	86295500	3628700
Argentina	1	0	0
Bangladesh	1	0	0
Burundi	1	180000	0
Chad	1	2400000	0
China	2	60160000	3600000
Ecuador	1	107500	1700
El Salvador	1	0	27000
Ethiopia	1	6200000	0
Guatemala	1	2500000	0
Honduras	1	45000	0
India	1	0	0
Kyrgyzstan	1	2000000	0
Nepal	1	303000	0
Niger	1	7900000	0
Paraguay	1	200000	0
South Sudan	1	4300000	0
Venezuela (Bolivarian Republic of)	1	0	0
2010	17	49372978	3884700
Barbados	1	0	0
Bolivia (Plurinational State of)	1	62500	100000
Brazil	1	62000	0
China	1	35000000	2370000
Djibouti	1	200258	0
Grenada	1	0	0
Guyana	1	0	14700
Mali	1	600000	0
Mauritania	1	838000	0
Mozambique	1	460000	0
Russian Federation	1	0	1400000
Saint Lucia	1	0	0
Saint Vincent and the Grenadines	1	0	0
Somalia	1	4000000	0
Thailand	1	6482602	0
Trinidad and Tobago	1	0	0
Zimbabwe	1	1667618	0
2011	17	30423194	8142000
Afghanistan	1	1750000	142000
Burkina Faso	1	2850000	0
Burundi	1	0	0
Ethiopia	1	4805679	0
Kenya	2	8050000	0
Lesotho	1	725515	0
Mali	1	3500000	0
Mauritania	1	723000	0
Mexico	1	2500000	0
Niger	1	3000000	0
Senegal	1	850000	0
Thailand	1	0	0
Tuvalu	1	0	0
Uganda	1	669000	0
United Republic of Tanzania	1	1000000	0
United States of America	1	0	8000000
2012	21	35563085	25481200
Angola	1	1833900	0
Brazil	1	4000000	1460000
Cameroon	1	12000	0
Chad	1	1600000	0
Democratic People's Republic of Korea	1	3000000	0
Ethiopia	1	1000000	0
Gambia	1	428000	0
Guatemala	1	266485	0
Honduras	1	125000	0
Italy	1	0	1190000
Malawi	1	1900000	0
Paraguay	1	1391900	0
Republic of Moldova	1	5800	0
Russian Federation	1	0	1140000
Somalia	1	3000000	0
Sri Lanka	1	1800000	0
Sudan	1	3200000	0
Thailand	1	12000000	1200
Ukraine	1	0	1690000
United States of America	2	0	20000000
2013	9	10504904	1587000
Bolivia (Plurinational State of)	1	340355	0
China	1	5000000	0
Ecuador	1	3165	0
Marshall Islands	1	6384	0
Namibia	1	780000	64000
New Zealand	1	0	823000
Panama	1	0	200000
Paraguay	1	75000	0
Zimbabwe	1	4300000	500000
2014	18	70447051	10975000
Bolivia (Plurinational State of)	1	51180	0
Brazil	1	27000000	5000000
Burkina Faso	1	4000000	0
China	2	27726000	3680000
Guatemala	1	1300000	58000
Haiti	1	1000000	2000
Honduras	1	2023000	0
Jamaica	1	91545	10000
Kenya	1	1600000	0
Madagascar	1	20000	0
Malaysia	1	2200000	0
Nicaragua	1	460000	0
Senegal	1	639702	0
Somalia	1	535624	0
Sri Lanka	1	1800000	25000
Thailand	1	0	0
United States of America	1	0	2200000
2015	29	383685115	22017299
Botswana	1	0	44000
China	1	0	2464000
Colombia	1	0	0
Costa Rica	1	0	0
Cuba	1	100000	0
Democratic People's Republic of Korea	1	18000000	0
El Salvador	1	700000	100000
Ethiopia	1	10200000	1400000
Fiji	1	67000	0
Gambia	1	63100	0
India	1	330000000	3000000
Indonesia	1	0	0
Malawi	1	6700000	0
Marshall Islands	1	21000	4900
Namibia	1	580000	60000
Niger	1	2588128	0
Palau	1	14200	0
Panama	1	0	0
Papua New Guinea	1	2520000	60000
Philippines	1	181687	84399
Samoa	1	0	0
Solomon Islands	1	0	0
Somalia	1	6700000	0
South Africa	1	2700000	250000
Sudan	1	800000	0
Thailand	1	0	3300000
Tonga	1	0	0
United States of America	1	0	4500000
Viet Nam	1	1750000	6750000
2016	14	29526000	3554000
Bolivia (Plurinational State of)	1	665000	450000
Cambodia	1	2500000	0
China	1	10000000	3000000
Eswatini	1	492000	0
Haiti	1	3600000	84000
Kenya	1	3400000	0
Lesotho	1	709000	0
Madagascar	1	1140000	0
Micronesia (Federated States of)	1	100000	0
Mozambique	1	2300000	0
Paraguay	1	0	0
South Sudan	1	3600000	0
Sri Lanka	1	900000	20000
Timor-Leste	1	120000	0
2017	12	18561874	6122000
Angola	1	1420000	0
Cabo Verde	1	70000	0
Chad	1	1886800	0
China	1	2000000	122000
Democratic People's Republic of Korea	1	0	0
Italy	1	0	2300000
Madagascar	1	1260000	0
Mauritania	1	3893774	0
Niger	1	1131300	0
South Africa	1	0	1200000
United States of America	1	0	2500000
Zimbabwe	1	6900000	0
2018	16	25548210	9353669
Afghanistan	1	13500000	0
Argentina	1	0	3400000
Australia	1	0	1200000
El Salvador	1	386610	37000
Guatemala	1	1500000	44669
Honduras	1	360000	0
India	1	8200000	1100000
Lithuania	1	0	0
Mauritania	1	350600	0
Namibia	1	556000	0
Nicaragua	1	300000	0
Panama	1	0	72000
Poland	1	0	0
Senegal	1	320000	0
United States of America	1	0	3000000
Uruguay	1	75000	500000
2019	16	22722593	160600
Argentina	1	35032	0
Botswana	1	38000	0
Costa Rica	1	0	0
Democratic People's Republic of Korea	1	10100000	0
Eswatini	1	232000	0
Kenya	1	2600000	0
Lao People's Democratic Republic	1	0	0
Lesotho	1	433000	0
Pakistan	1	4680912	0
Philippines	1	16000	25600
Somalia	1	1500000	0
South Africa	1	750000	135000
Sri Lanka	1	222091	0
Thailand	1	0	0
Viet Nam	1	685558	0
Zambia	1	1430000	0
2020	11	26089316	7750000
Angola	1	1643316	0
Brazil	1	0	3000000
Burkina Faso	1	2900000	0
Kenya	1	4500000	250000
Lesotho	1	766000	0
Madagascar	1	1680000	0
Mali	1	6800000	0
Mauritania	1	1400000	0
Mozambique	1	2700000	0
Niger	1	3700000	0
United States of America	1	0	4500000
2021	17	67515145	16093000
Afghanistan	1	11000000	0
Brazil	1	0	3000000
China	1	0	3100000
Ethiopia	1	6800000	0
Iran (Islamic Republic of)	1	4900000	0
Iraq	1	7000000	0
Kazakhstan	1	71000	0
Mozambique	1	1562771	0
Somalia	1	7100000	993000
South Africa	1	12000000	0
South Sudan	1	7723670	0
Syrian Arab Republic	1	5500000	0
Tuvalu	1	10204	0
United Republic of Tanzania	1	2100000	0
United States of America	1	0	9000000
Zambia	1	1580000	0
Zimbabwe	1	167500	0
2022	23	107353415	34240000
Brazil	1	0	4000000
Burkina Faso	1	3500928	0
Cabo Verde	1	46093	0
Cameroon	1	2389127	0
Central African Republic	1	2221692	0
Chad	1	2135362	0
China	1	6100000	7600000
Democratic Republic of the Congo	1	25972806	0
Djibouti	1	192168	0
Ethiopia	1	24100000	640000
France	1	0	0
Italy	1	0	0
Malawi	1	2678193	0
Mali	1	1735753	0
Marshall Islands	1	4480	0
Niger	1	4400000	0
Nigeria	1	19110398	0
Portugal	1	0	0
Sudan	1	11839300	0
Uganda	1	518000	0
United Kingdom of Great Britain and Northern Ireland	1	0	0
United States of America	1	0	22000000
Uruguay	1	409115	0
2023	9	21751471	22100000
Bolivia (Plurinational State of)	1	1948056	0
Brazil	1	608000	2500000
China	1	0	2700000
Honduras	1	10300	0
Indonesia	1	18750000	0
Italy	1	0	0
Spain	1	26000	2400000
United States of America	1	0	14500000
Uruguay	1	409115	0
Grand Total	488	1885713238	222097876

## Sheet: Paper info
Supplementary Material 1
Paper Title: An evaluation on the alignment of drought policy and planning guidelines with the contemporary disaster risk reduction agenda
Author: Ilyas Masih
Author's Affiliation: IHE Delft Institute for Water Education, Westvest 7, P.O. Box 3015, 2601 DA, Delft, the Netherlands
Correspondence to: Ilyas Masih (i.masih@un-ihe.org)
